# Supplementary material for: Nitroepoxide ring opening with thionucleophiles in water: synthesis of α-xanthyl ketones, β-keto sulfones and β-keto sulfonic acids
Source: Royal Society of Chemistry journal article supplement (doi:10.1039/d0ob00941e), 2020-01-01
Supplement: d0ob00941e1.pdf [file d0ob00941e1.pdf]

*Supporting Information*

**Nitroepoxide ring opening with thionucleophiles in water: Synthesis  
of  $\alpha$ -xanthyl ketones,  $\beta$ -ketosulfones and  $\beta$ -ketosulfonic acids**

**Elham Badali, Hossein Rahimzadeh, Ali Sharifi, Azizollah Habibi, Azim Ziyaei  
Halimehjani\***

*Faculty of Chemistry, Kharazmi University, P. O. Box 15719-14911, 49 Mofateh St., Tehran,  
Iran.*

*E-mail: ziyaei@khu.ac.ir*

| <b>Content</b>                                                      | <b>Pages</b> |
|---------------------------------------------------------------------|--------------|
| Experimental procedures and characterization data for all compounds | 2-10         |
| Copies of $^1\text{H}$ and $^{13}\text{C}$ NMR spectra              | 11-30        |
| References                                                          | 40           |

## Experimental

**General.** All chemicals and solvents were obtained from commercial sources and used as received. Nitroepoxides were prepared according to the literature.<sup>1</sup> <sup>1</sup>H and <sup>13</sup>C NMR spectra were recorded on a Bruker AMX 300 MHz spectrometers referenced to internal Me<sub>4</sub>Si at 0.00 ppm. Reaction monitoring was carried out by thin-layer chromatography using TLC silica gel 60 F254 plates. Elemental analyses were conducted with a Perkin Elmer 2004 Series II CHN analyzer. High-resolution mass spectra (HRMS) were recorded on a THERMO SCIENTIFIC Advantage and a THERMO SCIENTIFIC Exactive instrument with ESI-/APCI-Source.

### *General procedure for the synthesis of $\alpha$ -xantyl ketones **3a-o***

To a solution of xanthate (0.6 mmol) in H<sub>2</sub>O (3 mL), nitroepoxide (0.5 mmol) was added and the mixture was stirred at 70 °C for 5 h. In the end, the product was extracted with EtOAc (3 × 10 mL). The organic extracts were combined, washed with water (2×10 mL), dried with anhydrous Na<sub>2</sub>SO<sub>4</sub>, and evaporated under reduced pressure to give the crude product. Purification was carried out by column chromatography (SiO<sub>2</sub>; EtOAc/petroleum ether, 1/8).

### *General procedure for the synthesis of $\beta$ -keto sulfones **4a-g** and $\beta$ -keto sulfonic acids **5a-g***

Sodium aryl sulfinate/Sodium bisulfite (1.0 mmol) was added to a suspension of nitroepoxide (1.0 mmol) in H<sub>2</sub>O (5 mL) and the mixture was stirred at 60 °C for 6h. The solvent was evaporated under reduced pressure to give a precipitate. The precipitate was dissolved in EtOAc and again filtered to remove the inorganic salts. The filtrate was evaporated under reduced pressure and the residue was washed with petroleum ether to remove unreacted nitroepoxide to afford the pure product.

## Characterization data for all products

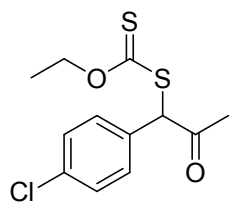

*S*-(1-(4-chlorophenyl)-2-oxopropyl) *O*-ethyl carbonodithioate (**3a**)<sup>2</sup>: Yellow viscous oil; (137 mg, yield 95%); <sup>1</sup>H NMR (300 MHz, CDCl<sub>3</sub>) δ 7.37-7.27 (m, 4H), 5.61 (s, 1H), 4.64 (q, *J* = 7.7 Hz, 2H), 2.28 (s, 3H), 1.42 (t, *J* = 7.1 Hz, 3H) ppm; <sup>13</sup>C NMR (75 MHz, CDCl<sub>3</sub>) δ 212.1, 200.9, 134.9, 131.4, 130.3, 129.4, 70.6, 63.7, 28.7, 13.6 ppm.

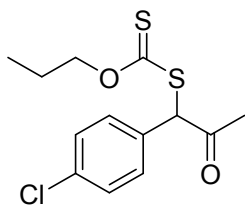

*S*-(1-(4-chlorophenyl)-2-oxopropyl) *O*-propyl carbonodithioate (**3b**): Pale yellow viscous oil; (136 mg, yield 90%); <sup>1</sup>H NMR (300 MHz, CDCl<sub>3</sub>) δ 7.36-7.28 (m, 4H), 5.61 (s, 1H), 4.50 (t, *J* = 6.7 Hz, 2H), 2.28 (s, 3H), 1.84-1.76 (m, 2H), 1.01-0.96 (t, *J* = 7.4 Hz, 3H) ppm; <sup>13</sup>C NMR (75 MHz, CDCl<sub>3</sub>) δ 212.4, 200.9, 134.9, 131.4, 130.4, 129.4, 76.2, 63.8, 28.8, 21.6, 10.3 ppm; HRMS (ESI<sup>-</sup>) calculated for C<sub>13</sub>H<sub>14</sub>ClO<sub>2</sub>S<sub>2</sub> [M-H]<sup>-</sup> 301.0124; found: 301.0129.

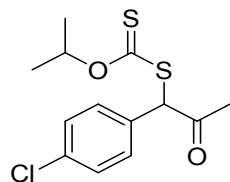

*S*-(1-(4-chlorophenyl)-2-oxopropyl) *O*-isopropyl carbonodithioate (**3c**): Yellow oil; (136 mg, yield 90%); <sup>1</sup>H NMR (300 MHz, CDCl<sub>3</sub>) δ 7.36-7.28 (m, 4H), 5.69 (m, 1H), 5.59 (s, 1H), 2.28 (s, 3H), 1.36-1.38 (d, *J* = 6.2 Hz, 6H) ppm; <sup>13</sup>C NMR (75 MHz, CDCl<sub>3</sub>) δ 211.3, 201.0, 134.8, 131.4, 130.3, 129.3, 78.8, 63.4, 28.7, 21.2, 21.1 ppm; HRMS (ESI<sup>-</sup>) calculated for C<sub>13</sub>H<sub>14</sub>ClO<sub>2</sub>S<sub>2</sub> [M-H]<sup>-</sup> 301.0124; found: 301.0128.

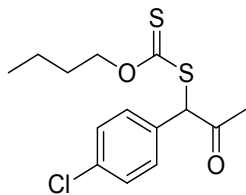

*O*-butyl *S*-(1-(4-chlorophenyl)-2-oxopropyl) carbonodithioate (**3d**): yellow viscous oil; (147 mg, yield 93%); <sup>1</sup>H NMR (300 MHz, CDCl<sub>3</sub>) δ 7.36-7.27 (m, 4H), 5.60 (s, 1H), 4.57 (t, *J* = 6.6 Hz, 2H), 2.28 (s, 3H), 1.80-1.70 (m, 2H), 1.45-1.37 (m, 2H), 0.97-0.92 (t, *J* = 7.3 Hz, 3H) ppm; <sup>13</sup>C NMR (75 MHz, CDCl<sub>3</sub>) δ 212.4, 200.9, 134.9, 131.4, 130.3, 129.4, 74.6, 63.8, 30.1, 28.8, 19.0, 13.6 ppm; HRMS (ESI<sup>-</sup>) calculated for C<sub>14</sub>H<sub>16</sub>ClO<sub>2</sub>S<sub>2</sub> [M-H]<sup>-</sup> 315.0280; found: 315.0287.

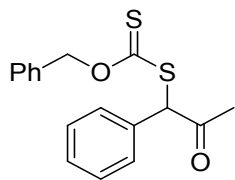

*O*-benzyl *S*-(2-oxo-1-phenylpropyl) carbonodithioate (**3e**): Yellow viscous oil, (145 mg, yield 92%);  $^1\text{H}$  NMR (300 MHz,  $\text{CDCl}_3$ )  $\delta$  7.41-7.23 (m, 10H), 5.57 (s, 1H), 5.55 (s, 2H), 2.18 (s, 3H) ppm;  $^{13}\text{C}$  NMR (75 MHz,  $\text{CDCl}_3$ )  $\delta$  211.7, 200.8, 134.9, 133.9, 131.2, 130.4, 129.4, 128.9, 128.7, 75.9, 63.7, 28.7 ppm; Anal calcd for  $\text{C}_{17}\text{H}_{16}\text{O}_2\text{S}_2$ : C, 64.53; H, 5.10; Found: C, 64.12; H, 5.19.

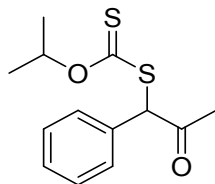

*O*-isopropyl *S*-(2-oxo-1-phenylpropyl) carbonodithioate (**3f**): Yellow viscous oil, (123 mg, yield 92%);  $^1\text{H}$  NMR (300 MHz,  $\text{CDCl}_3$ )  $\delta$  7.37-7.27 (m, 5H), 5.69 (m, 1H), 5.60 (s, 1H) 2.28 (s, 3H), 1.38-1.35 (d,  $J = 6.3$  Hz, 6H) ppm;  $^{13}\text{C}$  NMR (75 MHz,  $\text{CDCl}_3$ )  $\delta$  211.8, 201.3, 132.6, 129.2, 128.9, 128.7, 78.6, 64.2, 28.6, 21.2, 21.1 ppm; HRMS (ESI $^+$ ) calculated for  $\text{C}_{13}\text{H}_{17}\text{O}_2\text{S}_2$   $[\text{M}+\text{H}]^+$  269.0670; found: 269.0660.

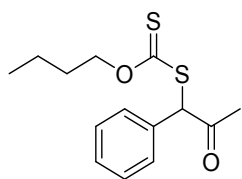

*O*-butyl *S*-(2-oxo-1-phenylpropyl) carbonodithioate (**3g**): Yellow viscous oil; (125 mg, yield 89%);  $^1\text{H}$  NMR (300 MHz,  $\text{CDCl}_3$ )  $\delta$  7.39-7.33 (m, 5H), 5.62 (s, 1H), 4.57 (t,  $J = 6.5$  Hz, 2H), 2.28 (s, 3H), 1.78-1.73 (m, 2H), 1.45-1.38 (m, 2H), 0.98 (t,  $J = 7.3$  Hz, 3H) ppm;  $^{13}\text{C}$  NMR (75 MHz,  $\text{CDCl}_3$ )  $\delta$  212.8, 201.3, 132.5, 129.2, 129.0, 128.8, 74.4, 64.5, 30.1, 28.7, 19.0, 13.6 ppm; HRMS (ESI $^+$ ) calculated for  $\text{C}_{14}\text{H}_{19}\text{O}_2\text{S}_2$   $[\text{M}+\text{H}]^+$  283.0826; found: 283.0820.

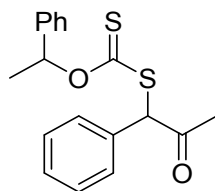

*S*-(2-oxo-1-phenylpropyl) *O*-(1-phenylethyl) carbonodithioate (**3h**): Yellow viscous oil, (143 mg, yield 87%);  $^1\text{H}$  NMR for a diastereomer (300 MHz,  $\text{CDCl}_3$ )  $\delta$  7.39-7.30 (m, 10H), 6.57 (m, 1H), 5.61 (s, 1H), 2.25 (ds, 3H), 1.69 (d,  $J = 6.7$  Hz, 3H) ppm;  $^{13}\text{C}$  NMR (75 MHz,  $\text{CDCl}_3$ )  $\delta$  211.7, 201.3, 139.9, 132.8, 129.2, 129.0, 128.8, 128.5, 128.3, 126.5, 82.2, 64.5, 28.7, 21.5 ppm; HRMS (ESI $^+$ ) calculated for  $\text{C}_{18}\text{H}_{19}\text{O}_2\text{S}_2$   $[\text{M}+\text{H}]^+$  331.0826; found: 331.0816.

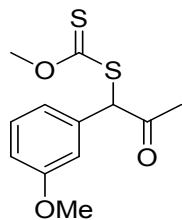

*S*-(1-(3-methoxyphenyl)-2-oxopropyl) *O*-methyl carbonodithioate (**3i**): Yellow viscous oil, (120 mg, yield 89%);  $^1\text{H NMR}$  (300 MHz,  $\text{CDCl}_3$ )  $\delta$  7.31-7.25 (m, 1H), 6.94- 6.86 (m, 3H), 5.59 (s, 1H), 4.15 (s, 3H), 3.80 (s, 3H), 2.28 (s, 3H) ppm;  $^{13}\text{C NMR}$  (75 MHz,  $\text{CDCl}_3$ )  $\delta$  213.7, 201.1, 160.1, 133.7, 130.2, 121.3, 114.6, 114.4, 64.8, 60.4, 55.2, 28.8 ppm; Anal. calcd for  $\text{C}_{12}\text{H}_{14}\text{O}_3\text{S}_2$ : C, 53.31; H, 5.22; Found: C, 53.27; H, 5.14.

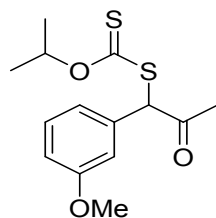

*O*-isopropyl *S*-(1-(3-methoxyphenyl)-2-oxopropyl) carbonodithioate (**3j**): yellow viscous oil, (124 mg, yield: 83%);  $^1\text{H NMR}$  (300 MHz, Chloroform-*d*)  $\delta$  7.27 (m, 1H), 6.94-6.86 (m, 3H), 5.70 (m, 1H), 5.57 (s, 1H), 3.80 (s, 3H), 2.28 (s, 3H), 1.38 (d,  $J = 6.2$  Hz, 6H) ppm;  $^{13}\text{C NMR}$  (75 MHz,  $\text{CDCl}_3$ )  $\delta$  211.9, 201.2, 160.0, 133.8, 130.2, 121.3, 114.6, 114.3, 78.6, 64.2, 55.3, 28.7, 21.2 ppm; HRMS (ESI $^+$ ) calculated for  $\text{C}_{14}\text{H}_{18}\text{NaO}_3\text{S}_2$  [ $\text{M}+\text{Na}$ ] $^+$  321.0595; found: 321.0598.

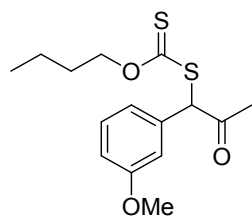

*O*-butyl *S*-(1-(3-methoxyphenyl)-2-oxopropyl) carbonodithioate (**3k**): Yellow viscous oil, (133 mg, yield 85%);  $^1\text{H NMR}$  (300 MHz,  $\text{CDCl}_3$ )  $\delta$  7.28 (m, 1H), 6.94-6.86 (m, 3H), 5.59 (s, 1H), 4.56 (t,  $J = 6.6$  Hz, 2H), 3.80 (s, 3H), 2.28 (s, 3H), 1.79-1.73 (m, 2H), 1.46-1.39 (m, 2H), 0.95 (t,  $J = 7.3$  Hz, 3H) ppm;  $^{13}\text{C NMR}$  (75 MHz,  $\text{CDCl}_3$ )  $\delta$  212.9, 201.2, 160.0, 133.8, 130.2, 121.3, 114.6, 114.3, 74.4, 64.5, 55.3, 30.1, 28.7, 19.0, 13.6 ppm; HRMS (ESI $^+$ ) calculated for  $\text{C}_{15}\text{H}_{20}\text{NaO}_3\text{S}_2$  [ $\text{M}+\text{Na}$ ] $^+$  335.0752; found: 335.0745.

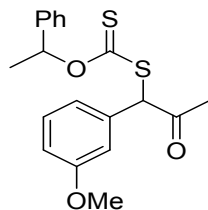

*S*-(1-(3-methoxyphenyl)-2-oxopropyl) *O*-(1-phenylethyl) carbonodithioate (**3l**): Yellow viscous oil, (144 mg, yield 80%); The product was obtained as a 1:1 mixture of diastereomers; spectroscopic for one of the diastereomers:  $^1\text{H NMR}$  (300 MHz,  $\text{CDCl}_3$ )  $\delta$  7.37-7.22 (m, 6H), 6.92-6.85(m, 4H), 6.57 (q,  $J = 6.6$  Hz 1H), 5.55 (s, 1H), 3.79 (s, 3H), 2.5 (s, 3H), 1.66 (d,  $J = 6.6$  Hz, 3H) ppm;  $^{13}\text{C NMR}$  (75 MHz,  $\text{CDCl}_3$ )  $\delta$  211.7, 201.1, 160.1, 139.9, 134.1,

130.2, 128.5, 128.3, 126.5, 121.3, 114.6, 114.3, 82.2, 64.4, 55.3, 28.7, 21.5 ppm; Anal. calcd for C<sub>19</sub>H<sub>20</sub>NaO<sub>3</sub>S<sub>2</sub> 383.0752; 383.0755

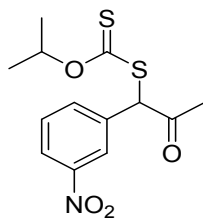

*O*-isopropyl *S*-(1-(3-nitrophenyl)-2-oxopropyl) carbonodithioate (**3m**): Yellow viscous oil; (141 mg, yield 90%); <sup>1</sup>H NMR (300 MHz, CDCl<sub>3</sub>) δ 8.27- 8.19 (m, 2H), 7.72-7.69 (m, 1H), 7.57 (t, *J* = 7.9 Hz, 1H), 5.76 (s, 1H), 5.70 (m, 1H), 2.35 (s, 3H), 1.40-1.36 (d, *J* = 6.3 Hz, 6H) ppm; <sup>13</sup>C NMR (75 MHz, CDCl<sub>3</sub>) δ 210.3, 200.4, 148.4, 136.0, 135.0, 129.9, 124.2, 123.6, 79.5, 63.2, 28.9, 21.2 ppm; HRMS (ESI<sup>+</sup>) calculated for C<sub>13</sub>H<sub>16</sub>O<sub>4</sub>NS<sub>2</sub> [M+H]<sup>+</sup> 314.0521; found: 314.0513.

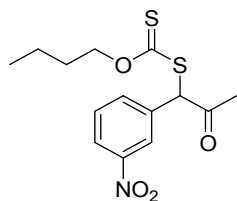

*O*-butyl *S*-(1-(3-nitrophenyl)-2-oxopropyl) carbonodithioate (**3n**): Yellow viscous oil, (140 mg, yield 86%); <sup>1</sup>H NMR (300 MHz, CDCl<sub>3</sub>) δ 8.26 (t, *J* = 1.9 Hz, 1H), 8.23-8.19 (m, 1H), 7.72-7.69 (m, 1H), 7.56 (t, *J* = 7.9 Hz, 1H), 5.77 (s, 1H), 4.56 (t, *J* = 6.7 Hz, 2H), 2.34 (s, 3H), 1.81-1.71 (m, 2H), 1.44-1.37 (m, 2H), 0.94 (t, *J* = 7.4 Hz, 3H) ppm; <sup>13</sup>C NMR (75 MHz, CDCl<sub>3</sub>) δ 211.3, 200.4, 148.4, 135.9, 135.0, 129.9, 124.2, 123.6, 75.0, 63.5, 30.1, 28.9, 19.0, 13.6 ppm; HRMS (ESI<sup>-</sup>) calculated for C<sub>14</sub>H<sub>16</sub>O<sub>4</sub>NS<sub>2</sub> [M-H]<sup>-</sup> 326.0521; found: 326.0526.

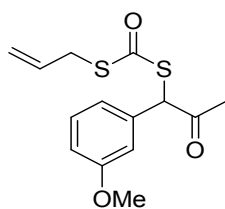

*S*-allyl *S*-(1-(3-methoxyphenyl)-2-oxopropyl) carbonodithioate (**3o**): Pale yellow viscous oil, (112 mg, yield 76%); <sup>1</sup>H NMR (300 MHz, CDCl<sub>3</sub>) δ 7.30-7.24 (m, 1H), 6.91-6.81 (m, 3H), 5.85-5.76 (m, 1H), 5.47 (s, 1H), 5.30-5.12 (m, 2H), 3.80 (s, 3H), 3.62 (dd, *J* = 6.7, 2.2 Hz, 2H), 2.24 (s, 3H) ppm; <sup>13</sup>C NMR (75 MHz, CDCl<sub>3</sub>) δ 201.1, 188.0, 160.1, 134.6, 132.2, 130.3, 121.1, 118.8, 114.5, 114.1, 59.6, 55.3, 33.4, 28.1 ppm; HRMS (ESI<sup>+</sup>) calculated for C<sub>14</sub>H<sub>17</sub>O<sub>3</sub>S<sub>2</sub> [M+H]<sup>+</sup> 297.0619; found: 297.0613.

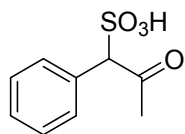

2-Oxo-1-phenylpropane-1-sulfonic acid (**4a**); Cream powder (197 mg, 92%); mp 128-130 °C; <sup>1</sup>H NMR (300 MHz, DMSO-*d*<sub>6</sub>) δ (ppm) 7.51-7.20 (m, 5H), 4.93 (s, 1H), 2.32 (s, 3H,

CH<sub>3</sub>) ppm; <sup>13</sup>C NMR (75 MHz, DMSO-*d*<sub>6</sub>) δ 202.1, 134.7, 129.9, 127.4, 126.8, 77.3, 30.2 ppm; HRMS (ESI<sup>-</sup>) calculated for C<sub>9</sub>H<sub>9</sub>O<sub>4</sub>S [M-H]<sup>-</sup> 213.0222; found: 213.0227.

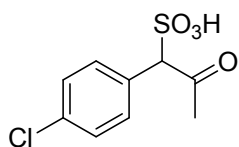

*1-(4-Chlorophenyl)-2-oxopropane-1-sulfonic acid (4b)*: White powder (153 mg, 62%); mp 235 °C (decomposed); <sup>1</sup>H NMR (300 MHz, D<sub>2</sub>O) δ 7.49-7.41, 5.41 (brs, 1H), 2.36 (s, 3H) ppm; <sup>13</sup>C NMR (75 MHz, D<sub>2</sub>O) δ 204.6, 134.3, 131.2, 129.6, 128.7, 74.5, 30.2 ppm; HRMS (ESI<sup>-</sup>) calculated for C<sub>9</sub>H<sub>8</sub>ClO<sub>4</sub>S [M-H]<sup>-</sup> 246.9832; found: 246.9837.

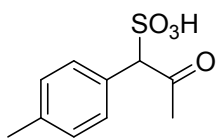

*2-Oxo-1-(p-tolyl)propane-1-sulfonic acid (4c)*: White powder (166 mg, 73%); mp 229 °C (decomposed); <sup>1</sup>H NMR (300 MHz, DMSO-*d*<sub>6</sub>) δ 7.37 (d, *J* = 7.8 Hz, 2H), 7.05 (d, *J* = 7.6 Hz, 2H), 4.81 (s, 1H), 2.29 (s, 3H), 2.25 (s, 3H) ppm; <sup>13</sup>C NMR (75 MHz, DMSO-*d*<sub>6</sub>) δ 202.2, 135.7, 131.9, 129.7, 127.9, 77.3, 29.9, 20.7 ppm; HRMS (ESI<sup>-</sup>) calculated for C<sub>10</sub>H<sub>11</sub>O<sub>4</sub>S [M-H]<sup>-</sup> 227.0378; found: 227.0385.

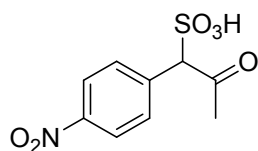

*1-(4-Nitrophenyl)-2-oxopropane-1-sulfonic acid (4d)*: Pale yellow powder (225 mg, 87%); mp 190 °C (decomposed); <sup>1</sup>H NMR (300 MHz, D<sub>2</sub>O) δ 8.13 (d, *J* = 8.5 Hz, 2H), 7.77 (d, *J* = 8.8 Hz, 2H), 5.31 (s, 1H), 2.40 (s, 3H) ppm; <sup>13</sup>C NMR (75 MHz, DMSO-*d*<sub>6</sub>) δ 200.8, 146.3, 142.8, 131.3, 122.2, 76.4, 30.9 ppm; HRMS (ESI<sup>-</sup>) calculated for C<sub>9</sub>H<sub>8</sub>NO<sub>6</sub>S [M-H]<sup>-</sup> 258.0072; found: 258.0078.

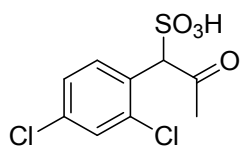

*1-(2,4-Dichlorophenyl)-2-oxopropane-1-sulfonic acid (4e)*: White powder (256 mg, 91%); mp 210-212 °C; <sup>1</sup>H NMR (300 MHz, D<sub>2</sub>O) δ 7.69 (d, *J* = 8.2 Hz, 1H), 7.60 (s, 1H), 7.40 (d, *J* = 8.2 Hz, 1H), 5.89 (s, 1H), 2.37 (s, 3H) ppm; <sup>13</sup>C NMR (75 MHz, D<sub>2</sub>O) δ 203.4, 134.9, 134.5, 130.9, 129.0, 127.4, 127.0, 70.4, 29.8 ppm; HRMS (ESI<sup>-</sup>) calcd for C<sub>9</sub>H<sub>7</sub>Cl<sub>2</sub>O<sub>4</sub>S [M-H]<sup>-</sup> 280.9442; found: 280.9448.

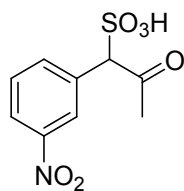

*1-(3-Nitrophenyl)-2-oxopropane-1-sulfonic acid (4f)*: Yellow powder (194 mg, 75%); mp 134-136 °C; <sup>1</sup>H NMR (300 MHz, CDCl<sub>3</sub>) δ 8.44 (s, 1H), 8.10 (dd, *J* = 8.2, 2.4 Hz, 1H),

7.88 (d,  $J = 7.5$  Hz, 1H), 7.54 (t,  $J = 8.0$  Hz, 1H), 5.35 (s, 1H), 2.40 (s, 3H) ppm;  $^{13}\text{C}$  NMR (75 MHz,  $\text{DMSO-}d_6$ )  $\delta$  201.2, 147.1, 137.2, 135.4, 128.6, 124.8, 121.6, 75.7, 31.0 ppm; HRMS (ESI<sup>-</sup>) calculated for  $\text{C}_9\text{H}_8\text{NO}_6\text{S}$  [ $\text{M-H}$ ]<sup>-</sup> 258.0072; found: 258.0076.

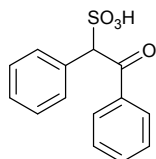

*2-oxo-1,2-diphenylethane-1-sulfonic acid* (**4g**): White solid (198 mg, 72%); mp 124-127 °C;  $^1\text{H}$  NMR (500 MHz,  $\text{DMSO-}d_6$ )  $\delta$  8.0 (2H, dd,  $J = 8.5, 1.6$  Hz, 2H), 7.57-7.53 (m, 1H), 7.46-7.40 (m, 4H), 7.32-7.29 (m, 2H), 7.24-7.21 (m, 1H), 6.07 (s, 1H), 6.03 (s, 1H) ppm;  $^{13}\text{C}$  NMR (125 MHz,  $\text{DMSO-}d_6$ )  $\delta$  199.1, 139.7, 134.7, 133.2, 128.8, 128.6, 128.4, 127.7, 127.2, 75.6 ppm; HRMS (ESI<sup>-</sup>) calculated for  $\text{C}_{14}\text{H}_{11}\text{O}_4\text{S}$  [ $\text{M-H}$ ]<sup>-</sup> 275.0387; found: 275.0378.

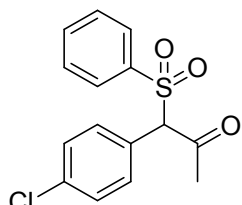

*1-(4-Chlorophenyl)-1-(phenylsulfonyl)propan-2-one* (**5a**): White powder (175 mg, 57%); mp 114-115 °C;  $^1\text{H}$  NMR (300 MHz,  $\text{CDCl}_3$ )  $\delta$  7.59 (d,  $J = 7.6$  Hz, 2H), 7.43-7.26 (m, 7H), 5.24 (s, 1H), 2.38 (s, 3H) ppm;  $^{13}\text{C}$  NMR (75 MHz,  $\text{CDCl}_3$ )  $\delta$  197.8, 136.7, 134.0, 130.3, 129.7, 129.6, 128.7, 128.5, 127.9, 80.2, 31.6 ppm; Anal. calcd for  $\text{C}_{15}\text{H}_{13}\text{ClO}_3\text{S}$ : C, 58.35; H, 4.24; Found: C, 58.06; H, 4.18.

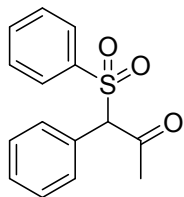

*1-Phenyl-1-(phenylsulfonyl)propan-2-one* (**5b**): White powder (214 mg, 78%); mp 111-112 °C;  $^1\text{H}$  NMR (300 MHz,  $\text{CDCl}_3$ )  $\delta$  7.61-7.56 (m, 3H), 7.43-7.23 (m, 7H), 5.25 (s, 1H), 2.49 (s, 3H) ppm;  $^{13}\text{C}$  NMR (75 MHz,  $\text{CDCl}_3$ )  $\delta$  197.8, 136.6, 134.0, 130.3, 129.7, 129.6, 128.7, 128.5, 127.8, 80.1, 31.6 ppm; HRMS (ESI<sup>+</sup>) calculated for  $\text{C}_{15}\text{H}_{18}\text{NO}_3\text{S}$  [ $\text{M}+\text{NH}_4$ ]<sup>+</sup> 292.1007; found: 292.1001.

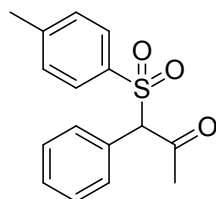

*1-Phenyl-1-tosylpropan-2-one* (**5c**): White powder (219 mg, 76%); mp 148-150 °C;  $^1\text{H}$  NMR (300 MHz,  $\text{CDCl}_3$ )  $\delta$  7.46 (d,  $J = 8.2$  Hz, 2H), 7.37-7.25 (m, 5H), 7.21 (d,  $J = 9.3$



Hz, 2H), 5.22 (s, 1H), 2.46 (s, 3H), 2.41 (s, 3H) ppm;  $^{13}\text{C}$  NMR (75 MHz,  $\text{CDCl}_3$ )  $\delta$  198.0, 145.1, 133.7, 130.3, 129.7, 129.5, 129.2, 128.7, 128.0, 80.2, 31.6, 21.6 ppm; HRMS (ESI<sup>+</sup>) calculated for  $\text{C}_{16}\text{H}_{20}\text{NO}_3\text{S}$  [ $\text{M}+\text{NH}_4$ ]<sup>+</sup> 306.1164; found: 306.1157.

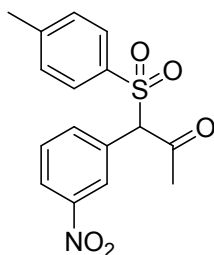

*1-(3-Nitrophenyl)-1-tosylpropan-2-one (5d)*: White powder (240 mg, 72%); mp 148-150 °C;  $^1\text{H}$  NMR (300 MHz,  $\text{DMSO}-d_6$ )  $\delta$  8.24-8.21 (m, 2H), 7.75 (d,  $J = 7.4$  Hz, 1H), 7.63 (t,  $J = 7.6$  Hz, 1H), 7.51 (d,  $J = 8.0$  Hz, 2H), 7.37 (d,  $J = 7.8$  Hz, 2H), 6.50 (s, 1H), 2.36 (s, 3H), 2.27 (s, 3H) ppm;  $^{13}\text{C}$  NMR (75 MHz,  $\text{DMSO}-d_6$ )  $\delta$  197.9, 147.5, 145.4, 137.1, 133.9, 130.6, 129.9, 129.7, 128.9, 125.2, 124.0, 76.1, 32.2, 21.1 ppm; HRMS (ESI<sup>-</sup>) calculated for  $\text{C}_{16}\text{H}_{14}\text{NO}_5\text{S}$  [ $\text{M}-\text{H}$ ]<sup>-</sup> 332.0593; found: 332.0598.

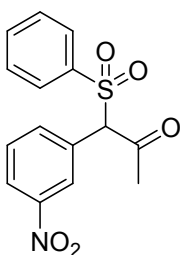

*1-(3-Nitrophenyl)-1-(phenylsulfonyl)propan-2-one (5e)*: Grey powder (239 mg, 75%); mp 139-140 °C;  $^1\text{H}$  NMR (300 MHz,  $\text{CDCl}_3$ )  $\delta$  8.24 (d,  $J = 7.9$  Hz, 1H), 8.03 (s, 1H), 7.79 (d,  $J = 7.5$  Hz, 1H), 7.67-7.46 (m, 6H), 5.34 (s, 1H), 2.41 (s, 3H) ppm;  $^{13}\text{C}$  NMR (75 MHz,  $\text{CDCl}_3$ )  $\delta$  196.0, 148.1, 136.3, 135.8, 135.6, 134.8, 130.0, 129.6, 129.0, 125.4, 124.3, 78.9, 32.6; HRMS (ESI<sup>-</sup>) calculated for  $\text{C}_{15}\text{H}_{12}\text{NO}_5\text{S}$  [ $\text{M}-\text{H}$ ]<sup>-</sup> 318.0436; found: 318.0442.

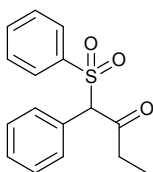

*1-phenyl-1-(phenylsulfonyl)butan-2-one (5f)*: White solid (173 mg, 60%); mp 97-100 °C;  $^1\text{H}$  NMR (400 MHz,  $\text{CDCl}_3$ )  $\delta$  7.39-7.26 (m, 5H), 5.09 (s, 1H), 3.93 (brs, 1H), 2.43-2.27 (m, 2H), 1.00 (t,  $J = 7.3$  Hz, 3H) ppm;  $^{13}\text{C}$  NMR (100 MHz,  $\text{CDCl}_3$ )  $\delta$  200.8, 136.7, 134.0, 130.3, 130.0, 129.6, 128.7, 128.5, 128.2, 79.6, 38.2, 7.6 ppm; HRMS (ESI) calculated for  $\text{C}_{16}\text{H}_{16}\text{NaO}_3\text{S}$  [ $\text{M}+\text{Na}$ ]<sup>+</sup> 311.0718; found: 311.0712.

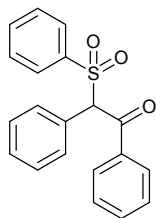

*1,2-diphenyl-2-(phenylsulfonyl)ethan-1-one (5g)*: White solid (233 mg, 70%); mp 117-120 °C (lit.<sup>3</sup>118-120 °C); <sup>1</sup>H NMR (400 MHz, CDCl<sub>3</sub>) δ 7.89-7.85 (m, 2H), 7.66-7.52 (m, 4H), 7.44-7.26 (m, 9H), 6.13 (s, 1H) ppm; <sup>13</sup>C NMR (100 MHz, CDCl<sub>3</sub>) δ 190.7, 136.9, 136.2, 134.0, 133.9, 130.5, 130.4, 129.7, 129.0, 128.9, 128.8, 128.6, 128.4, 76.3 ppm.

rahimzade.57.fid  
Ex-17

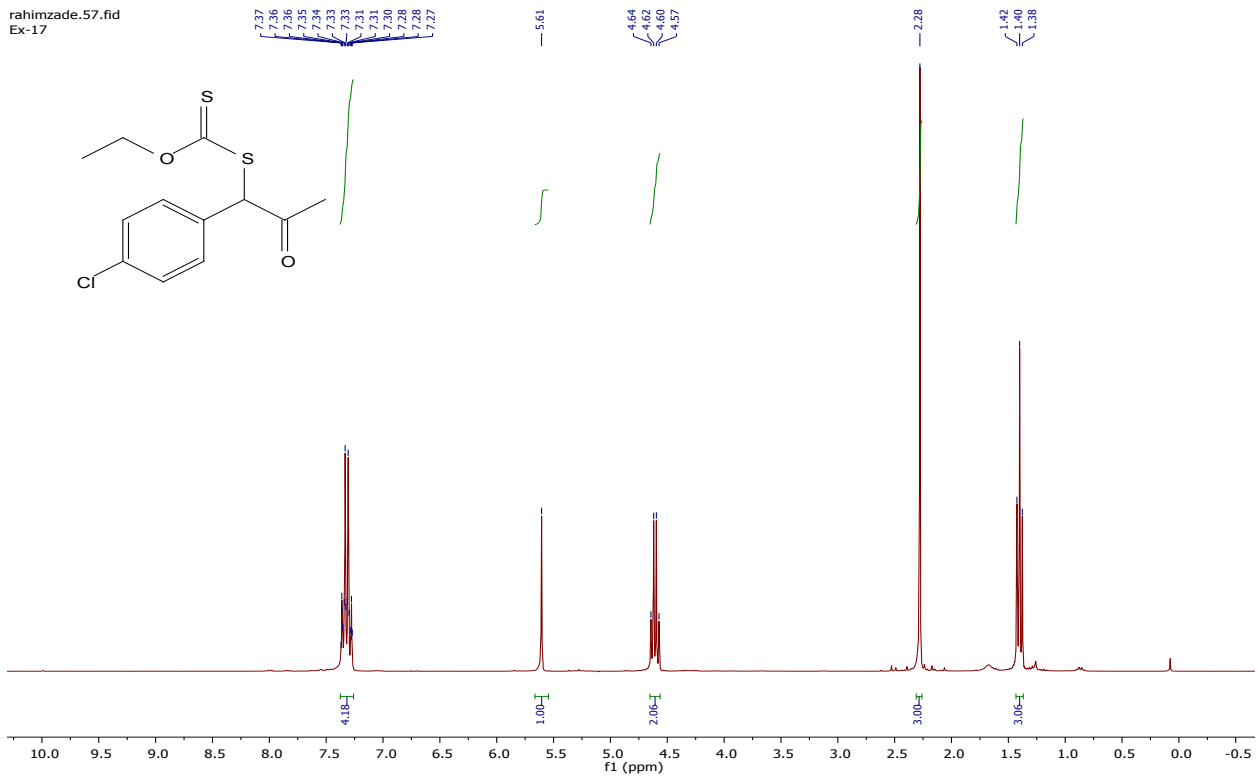

rahimzade.58.fid  
Ex-17

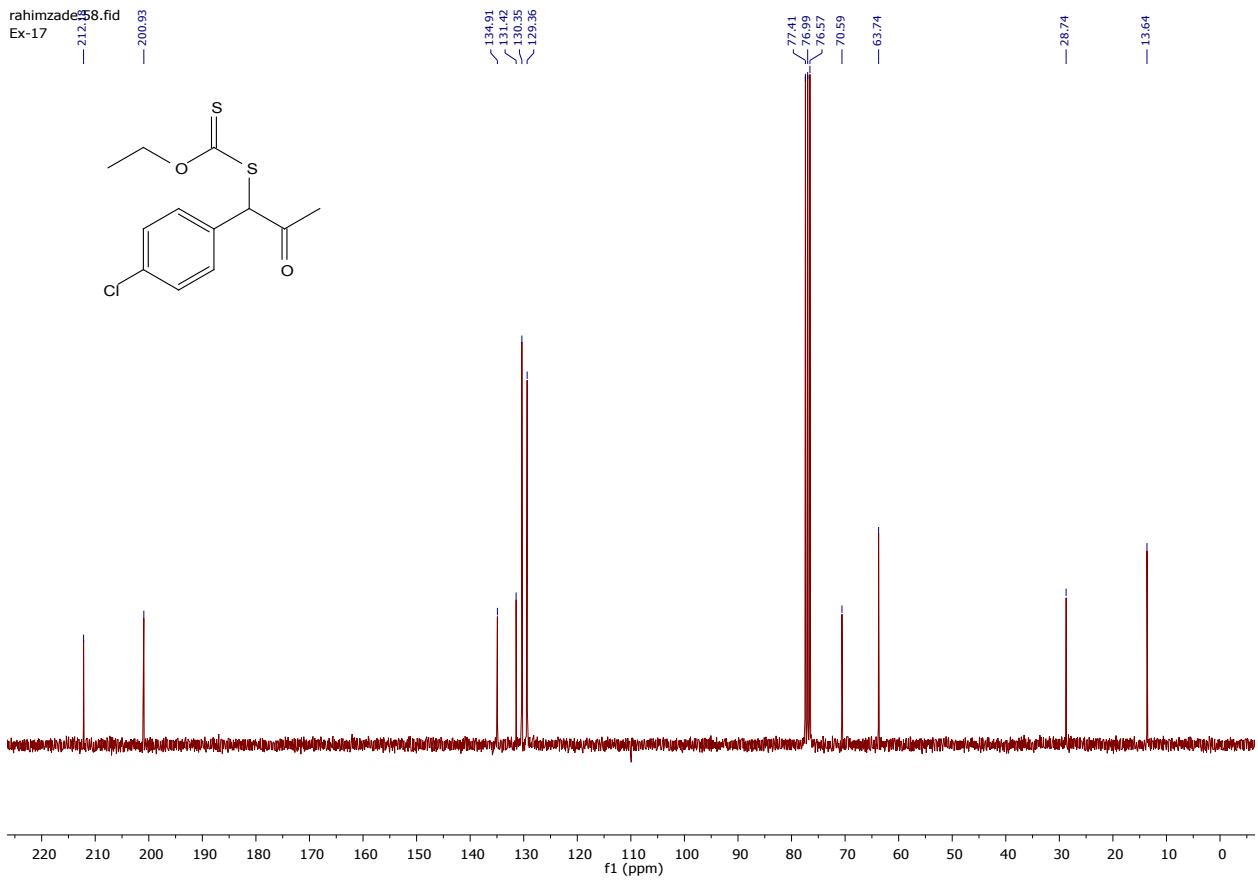

rahimzade\_49.fid  
EB1

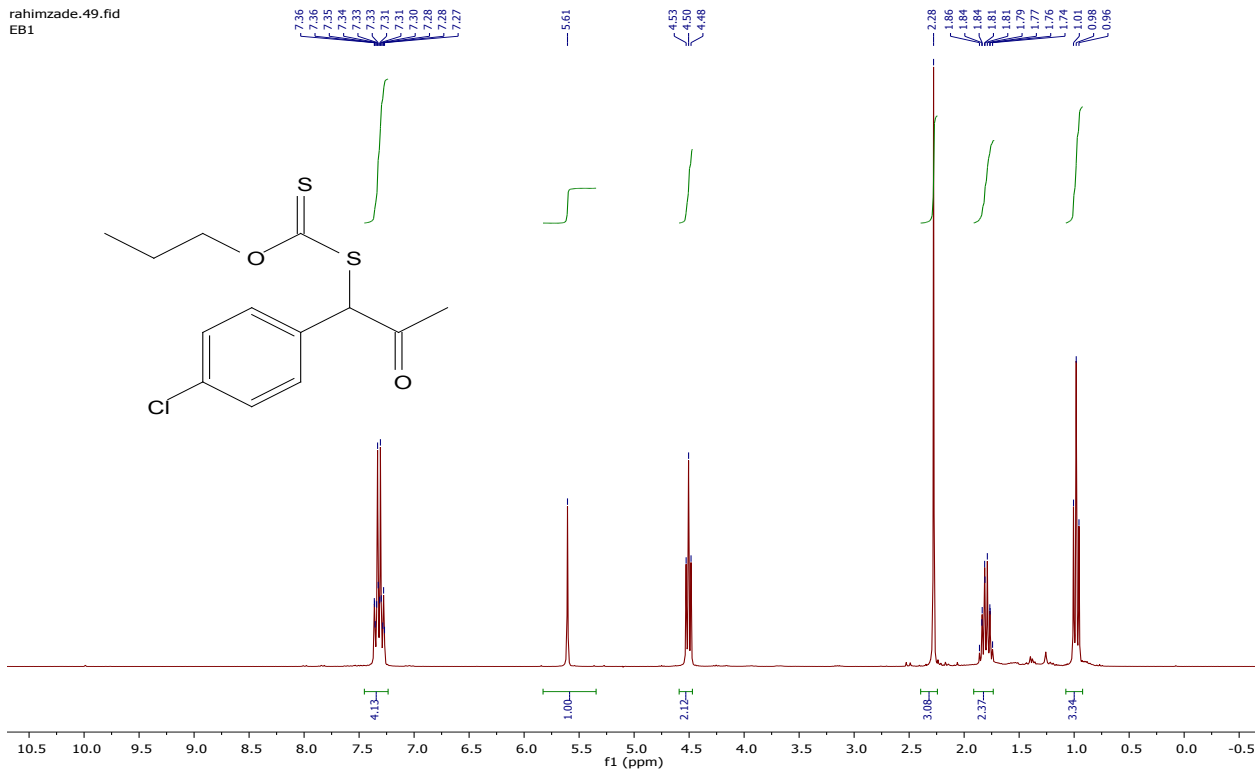

rahimzade\_59.fid  
EB1

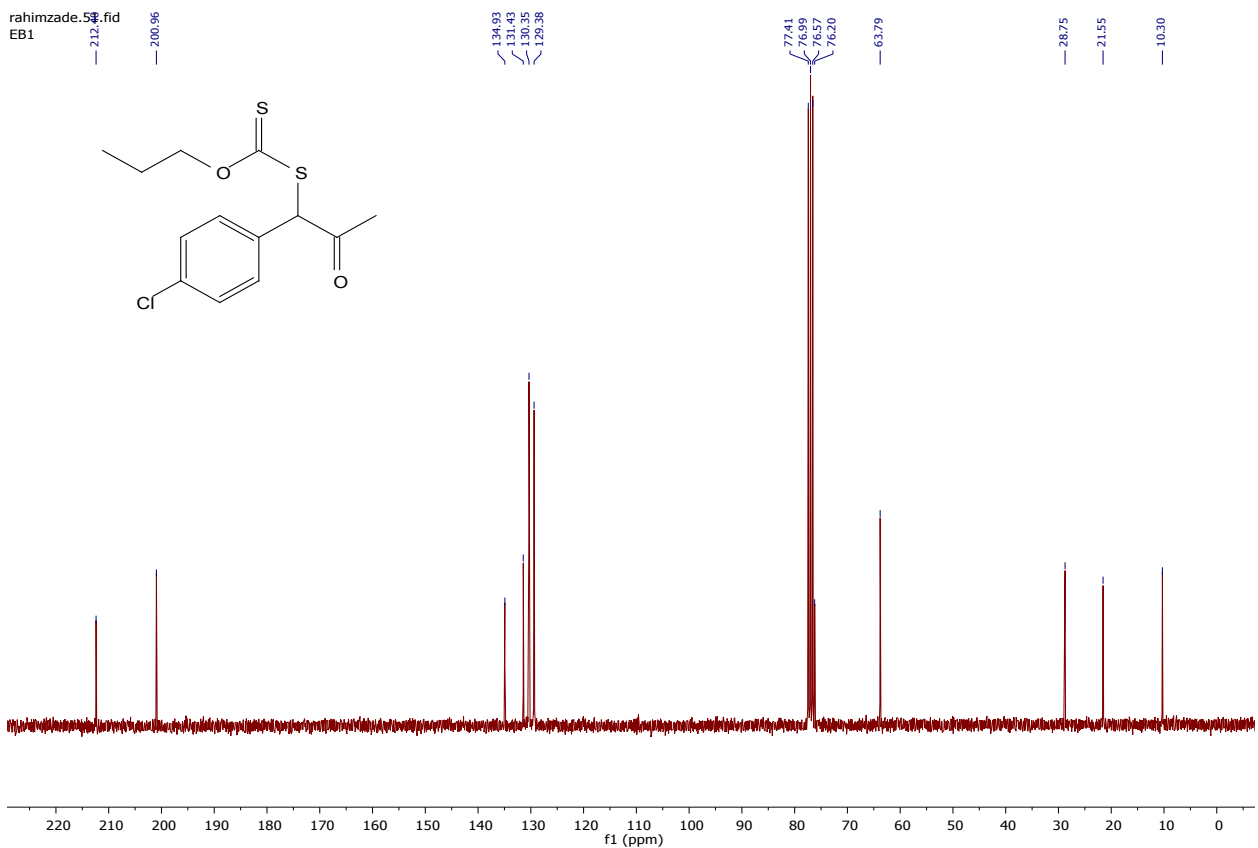

rahimzade.10.fid  
Ey1

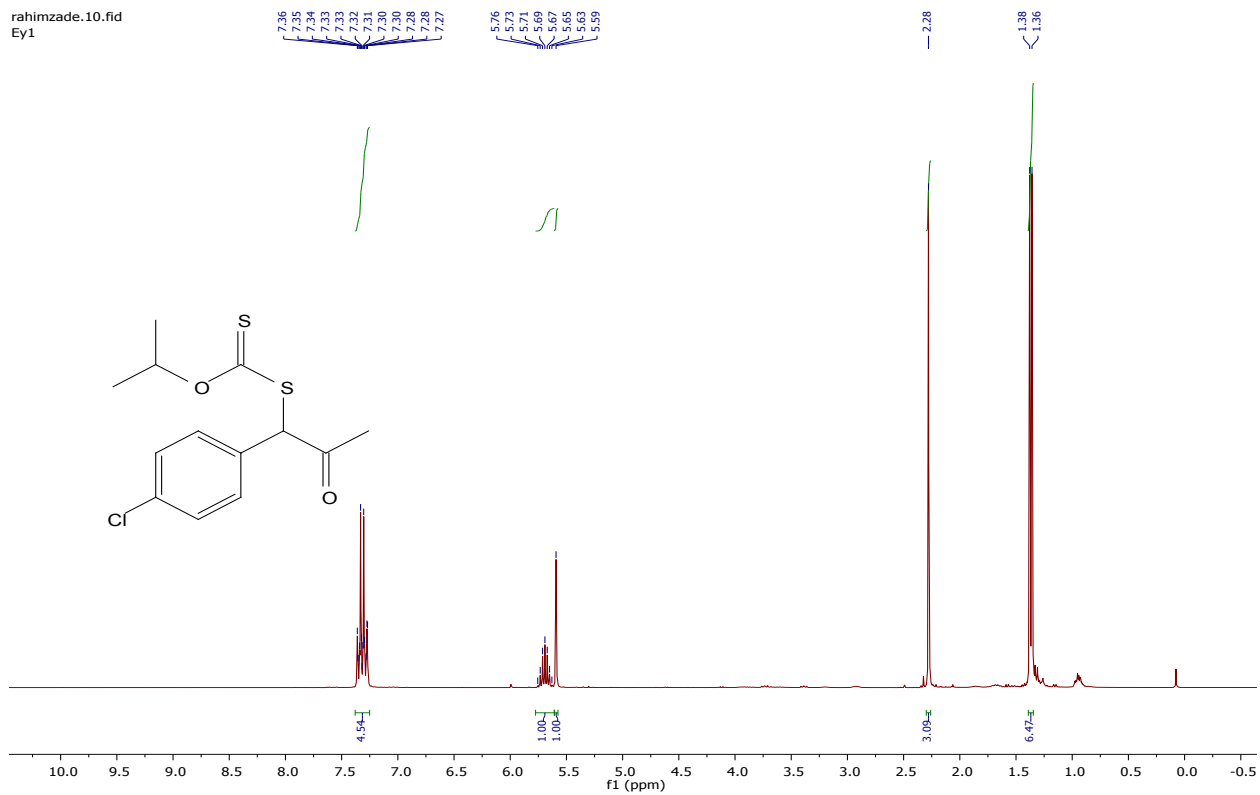

rahimzade.12.fid  
Ey1

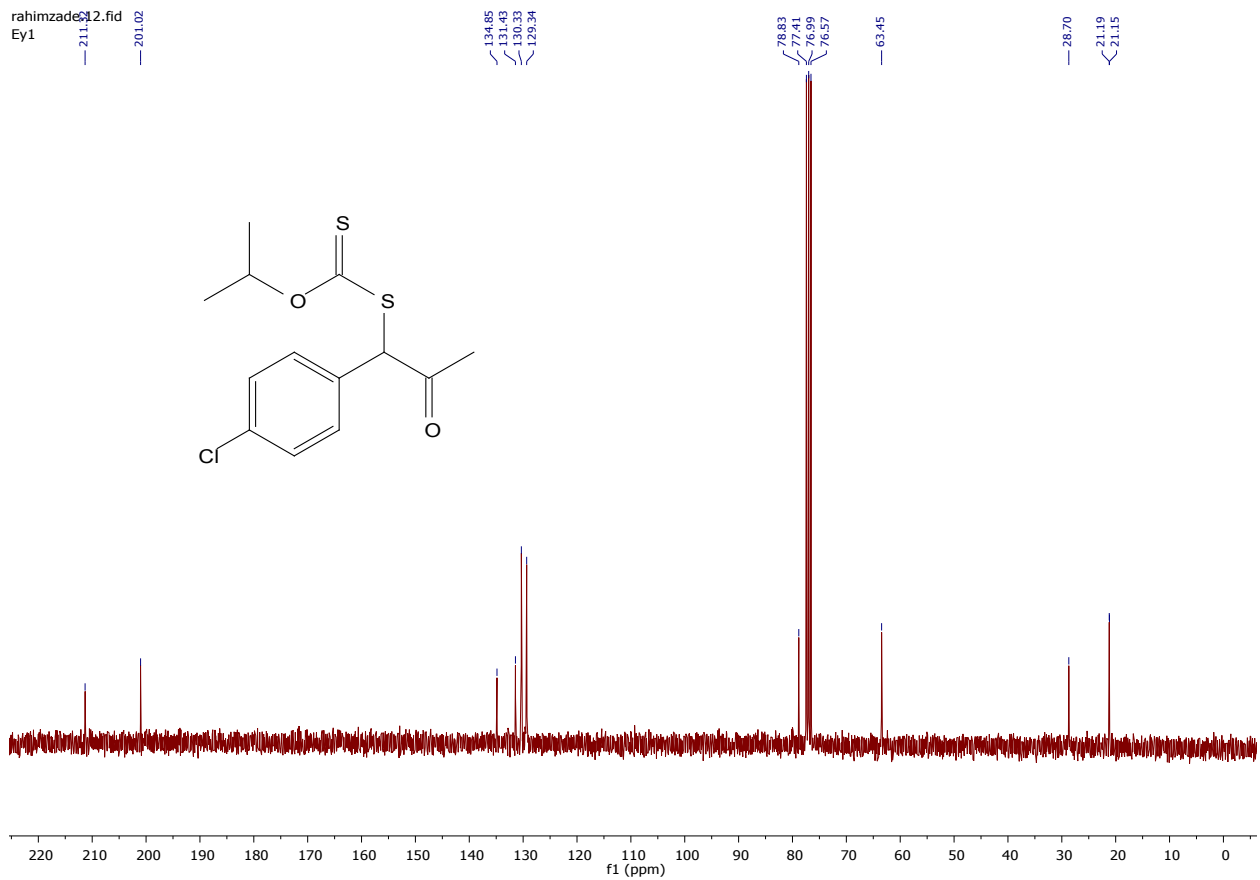

rahimzade.26.fid  
EY2

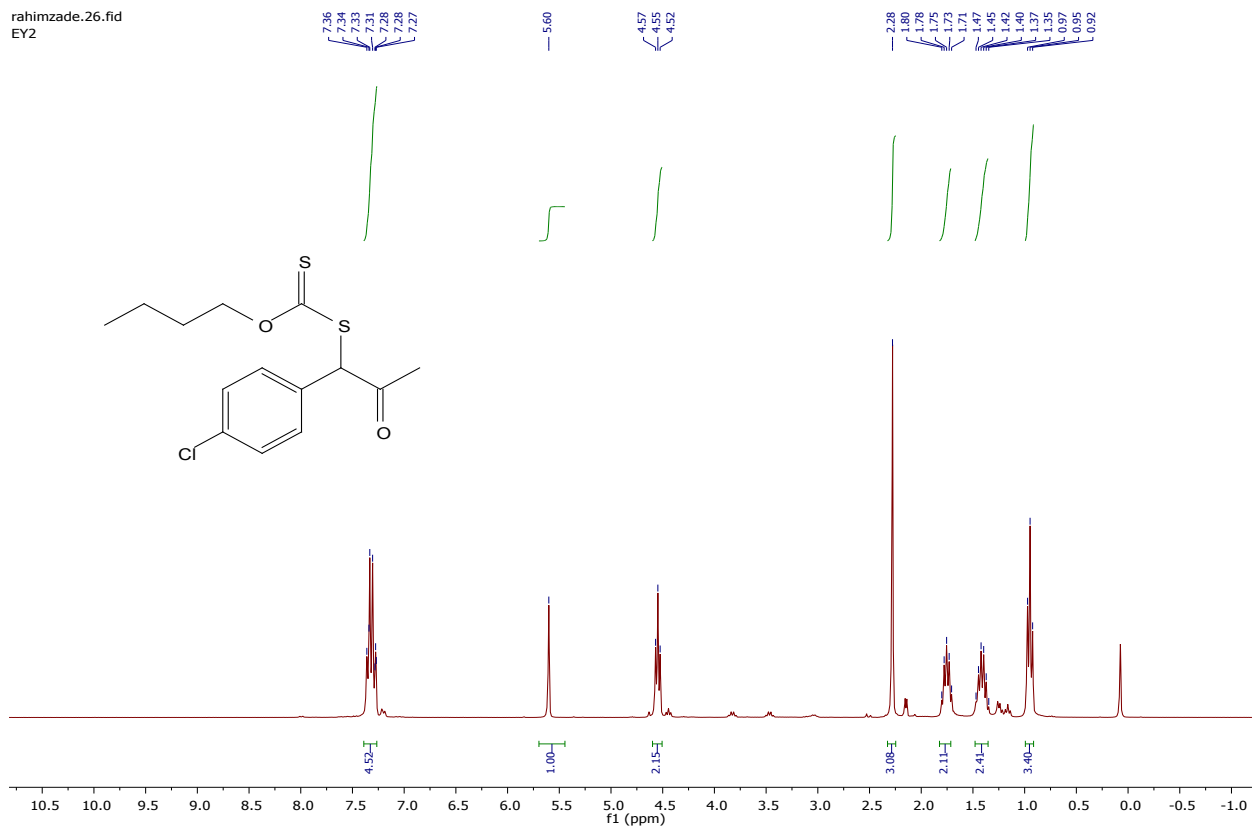

rahimzade.27.fid  
EY2

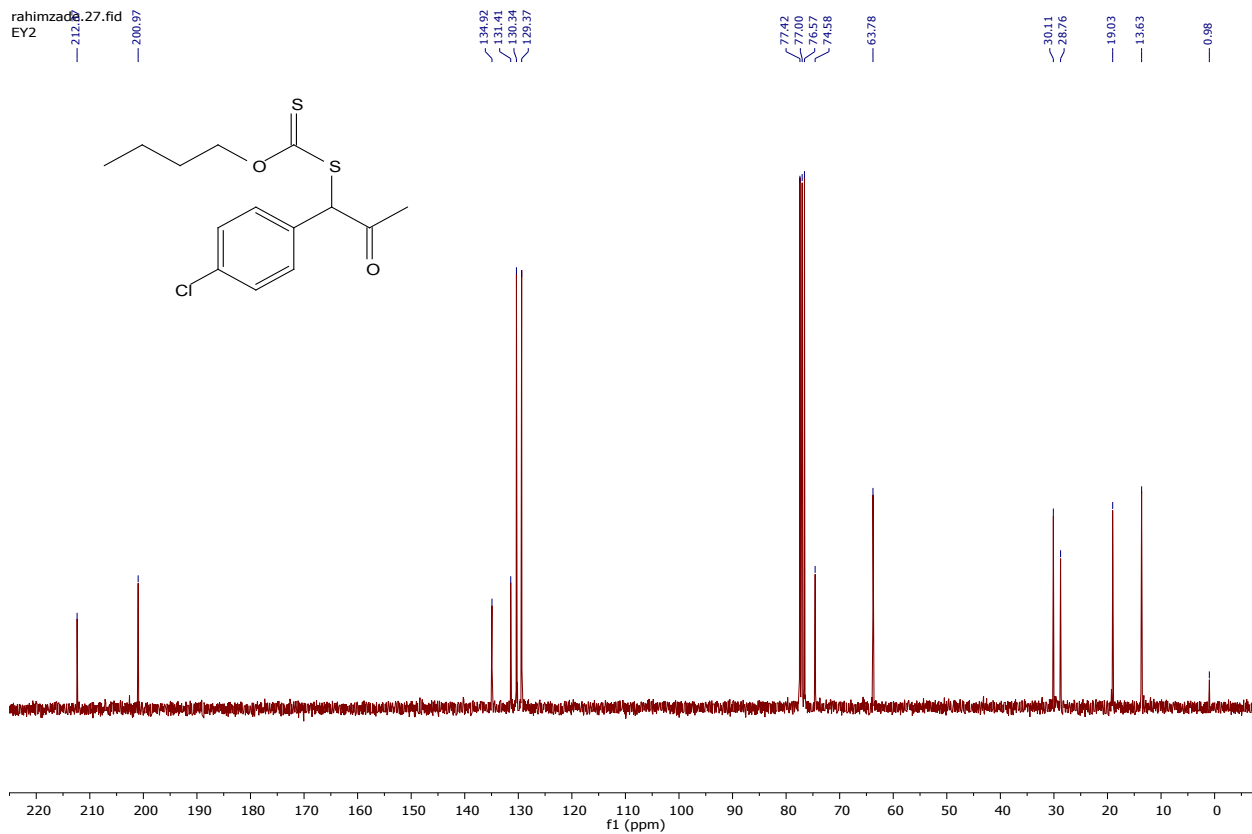

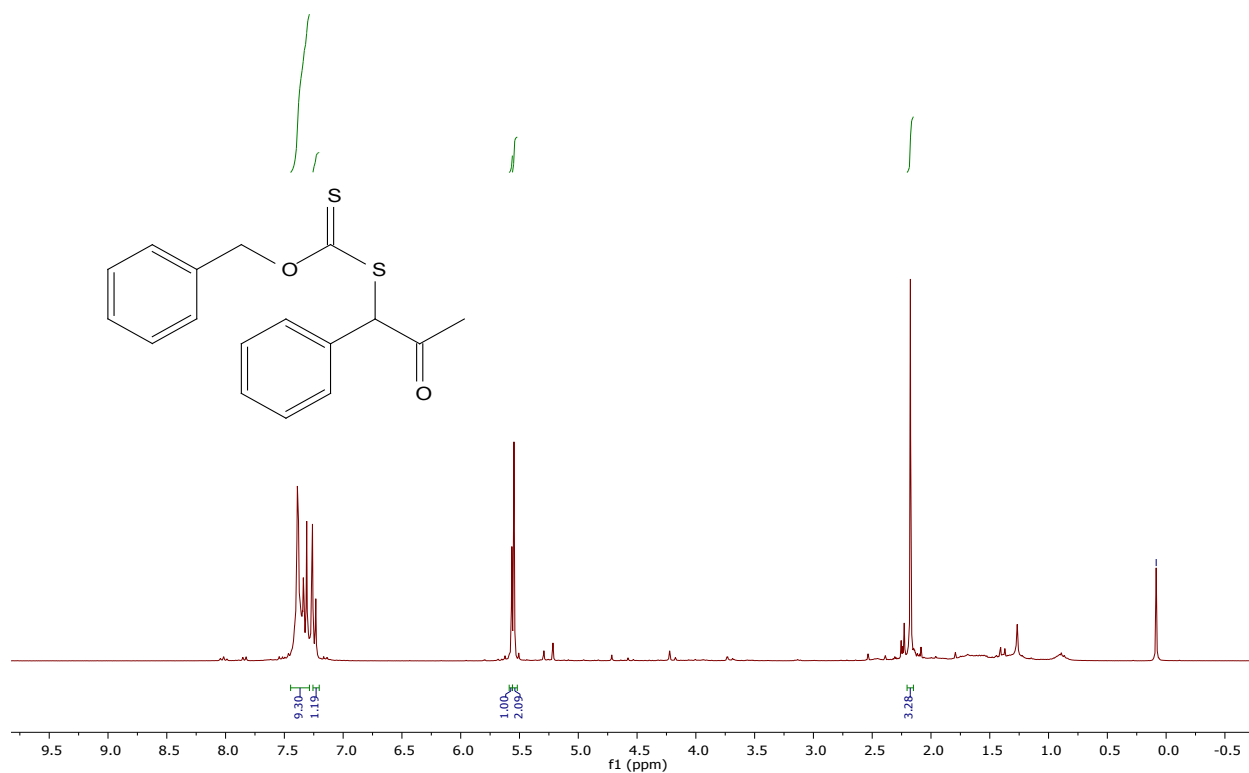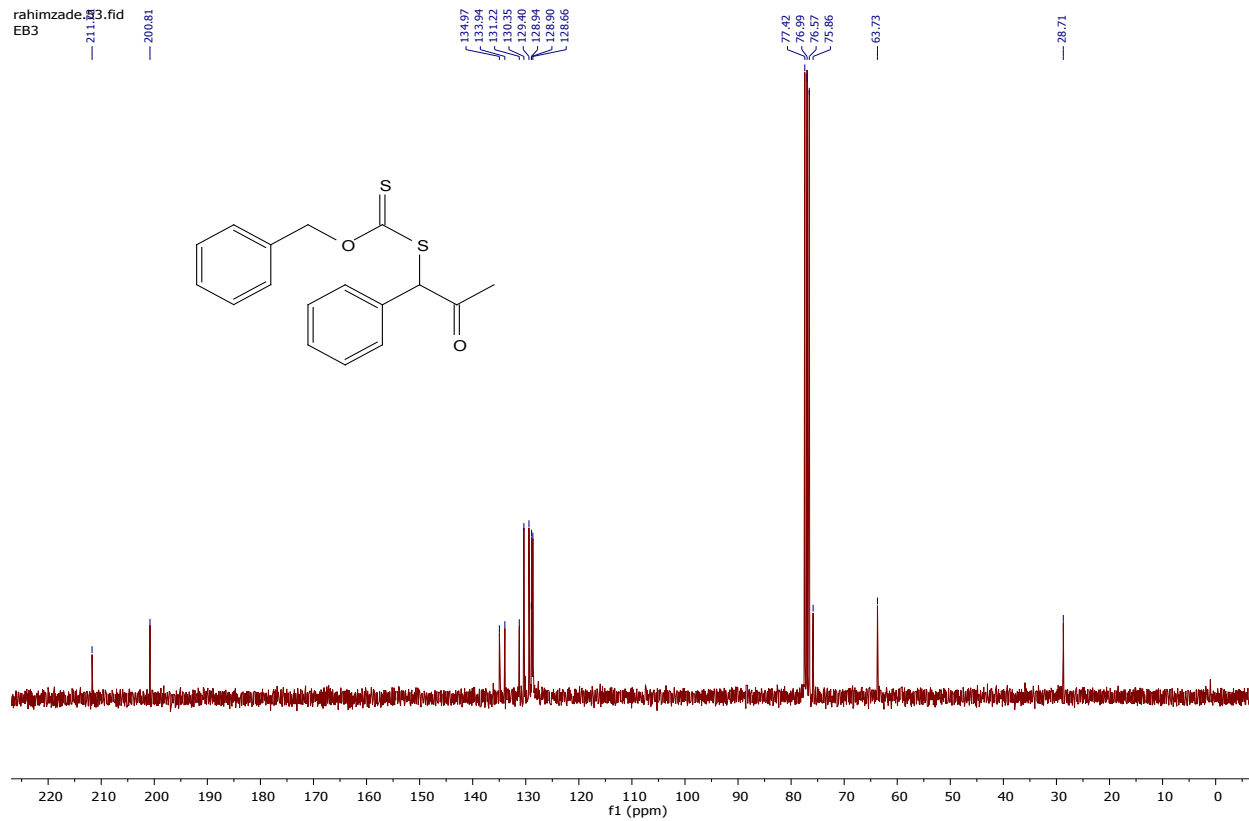

rahimzade.18.fid  
ES1

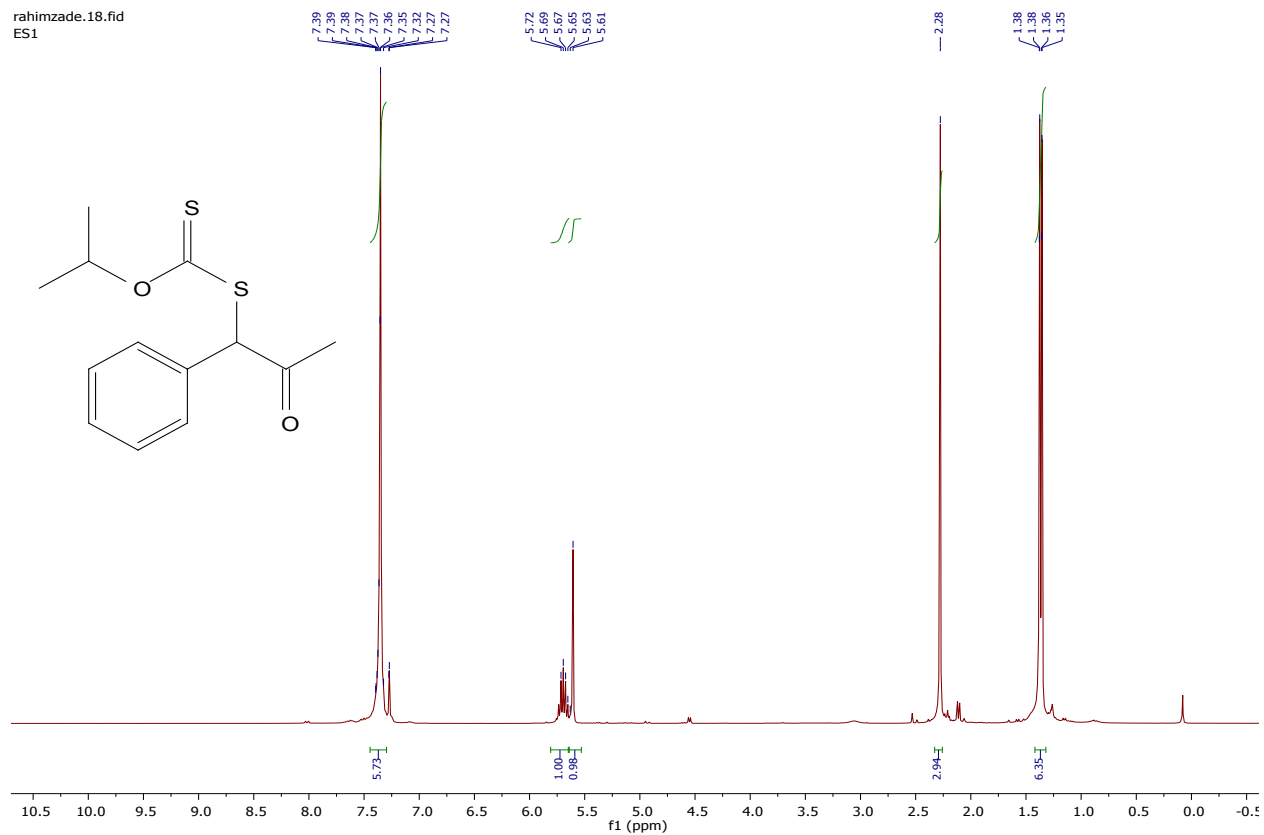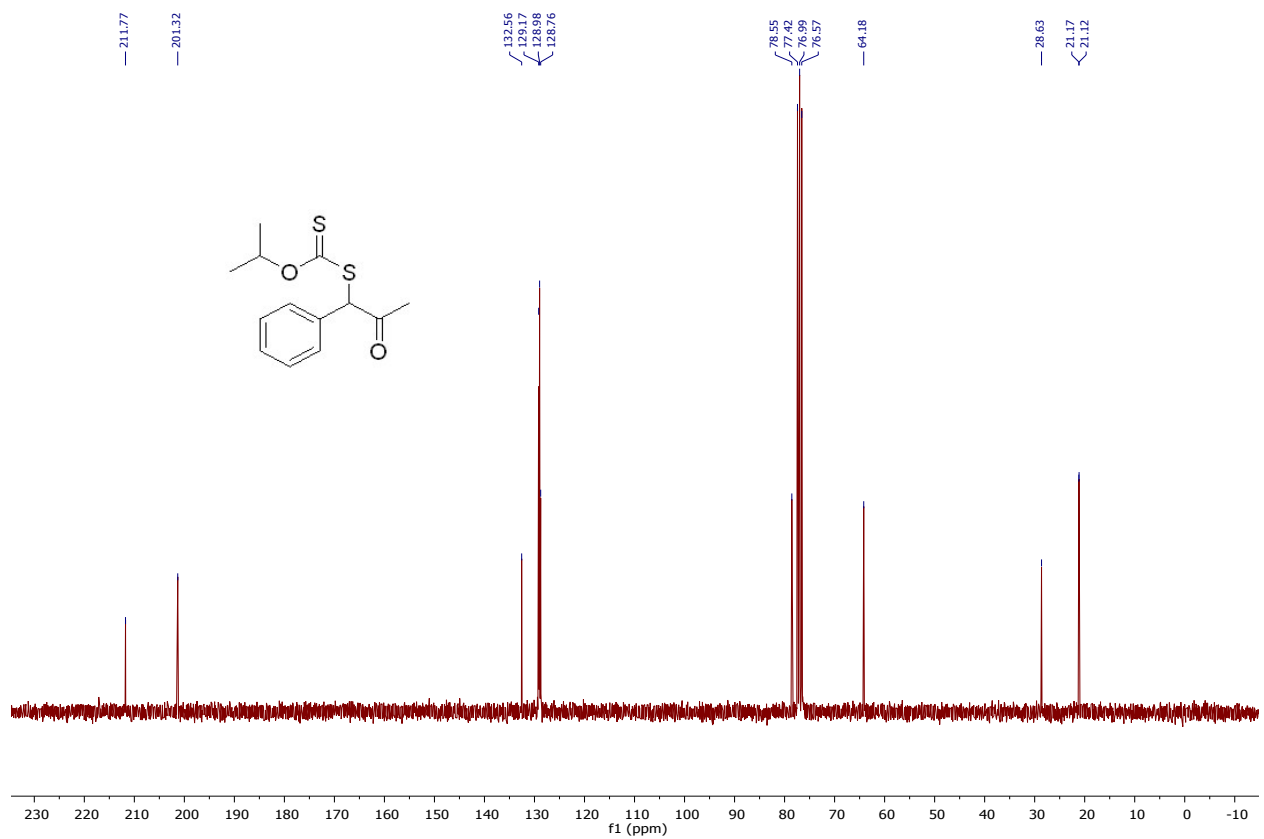



rahimzade.30.fid  
ES2

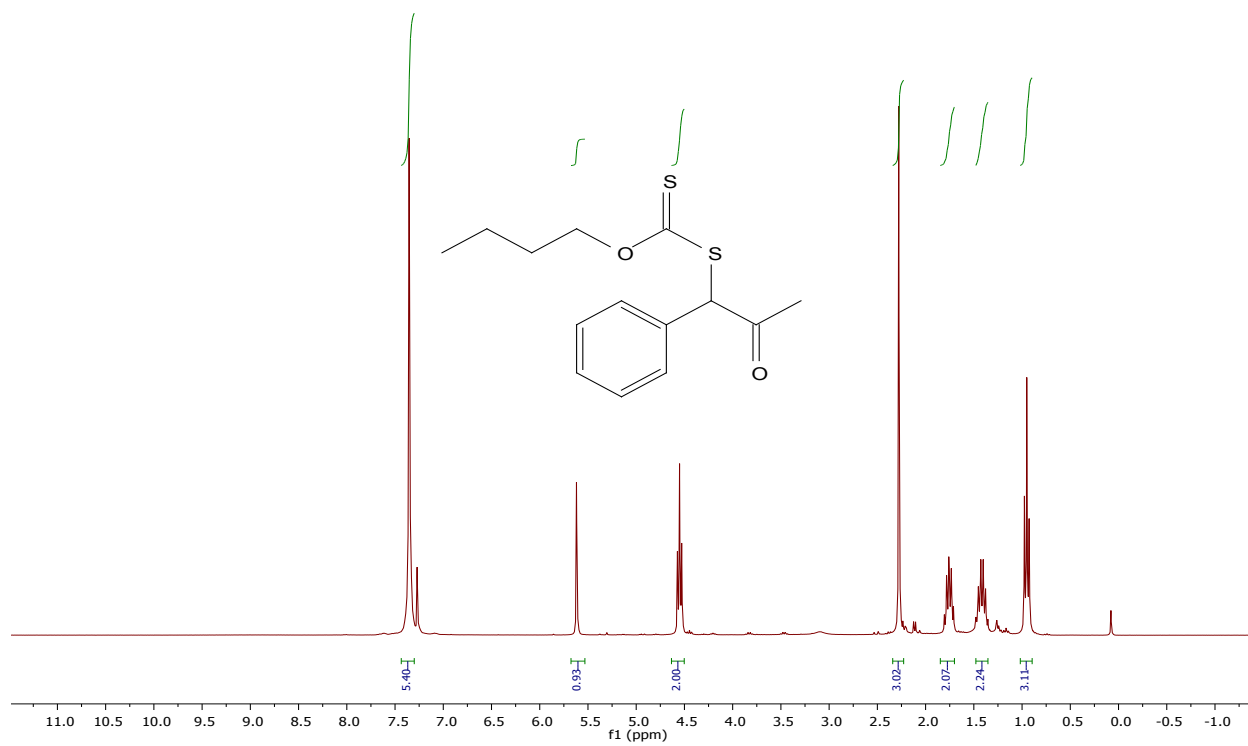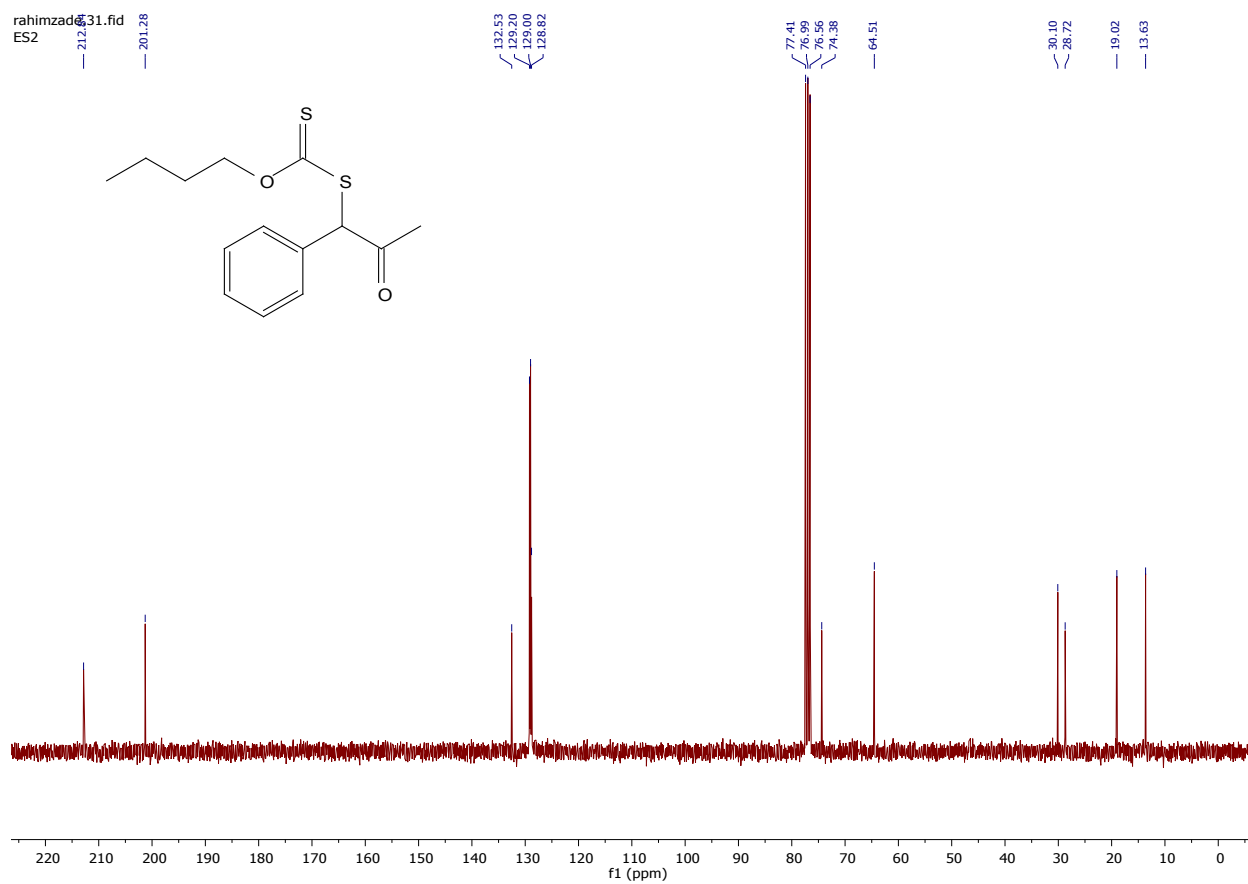

rahimzade.45.fid  
ES3

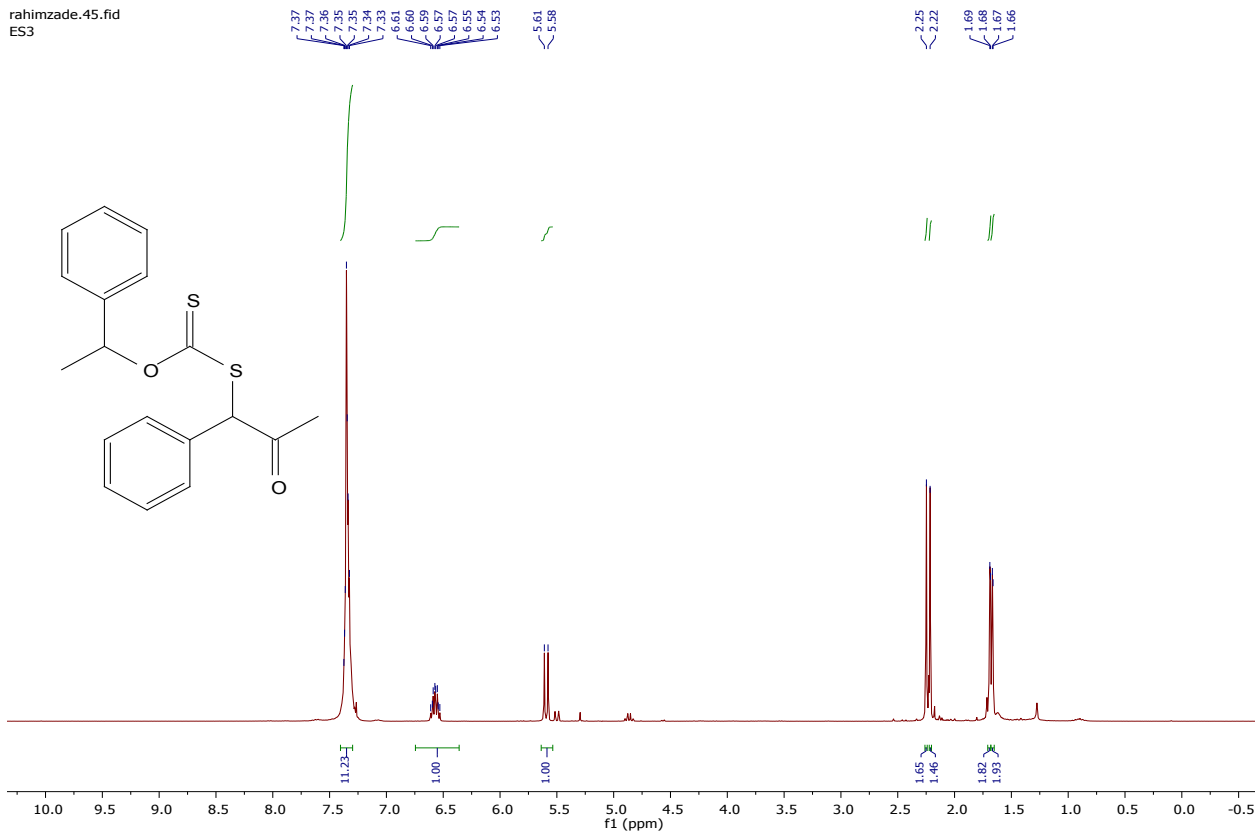

rahimzade.47.fid  
ES3

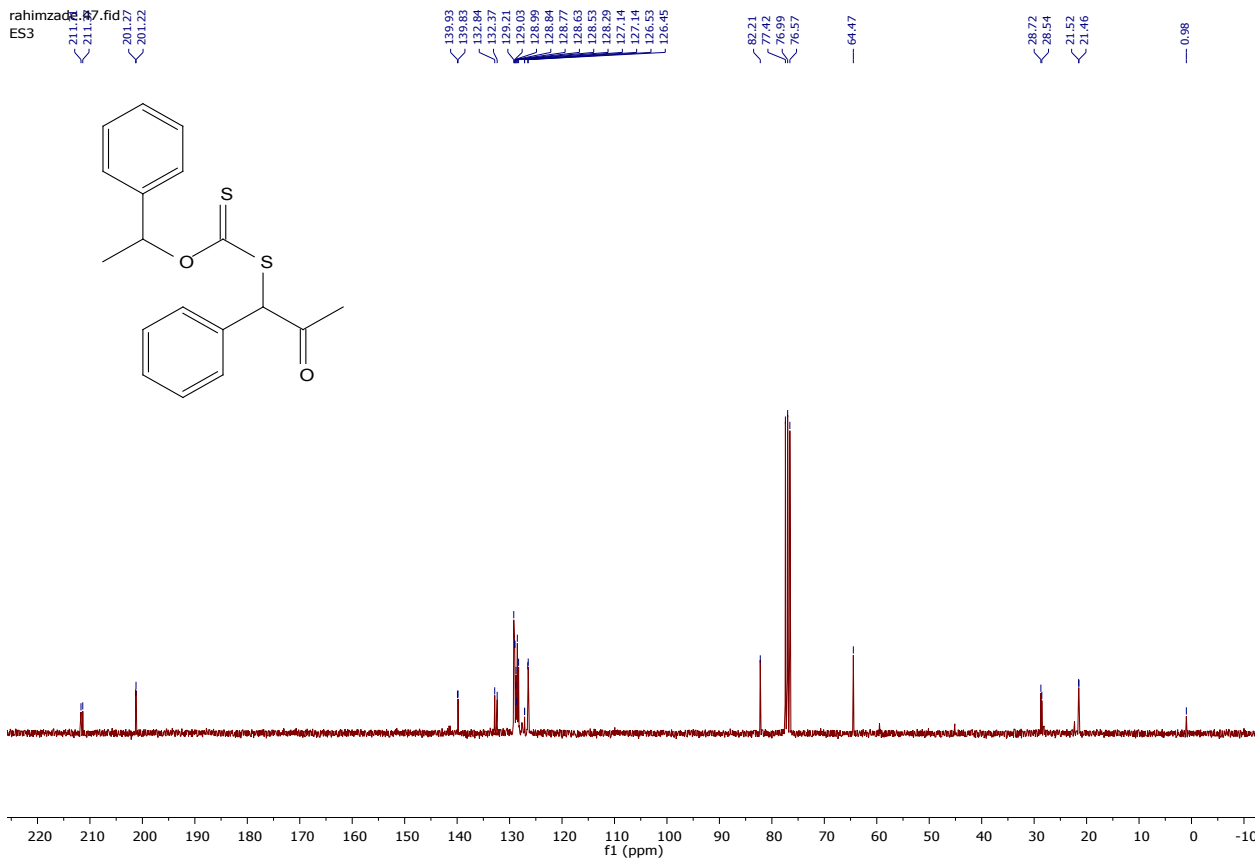

rahimzade.48.fid  
EB2

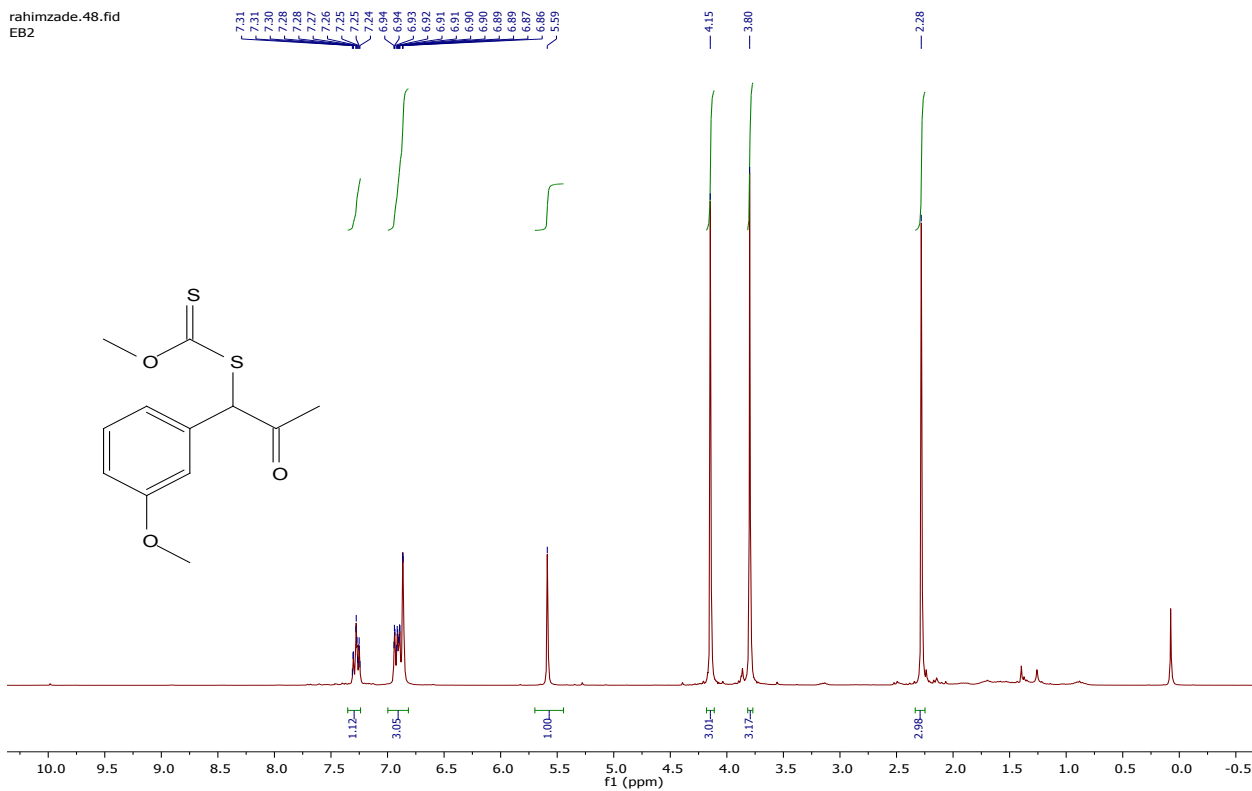

rahimzade.50.fid  
EB2

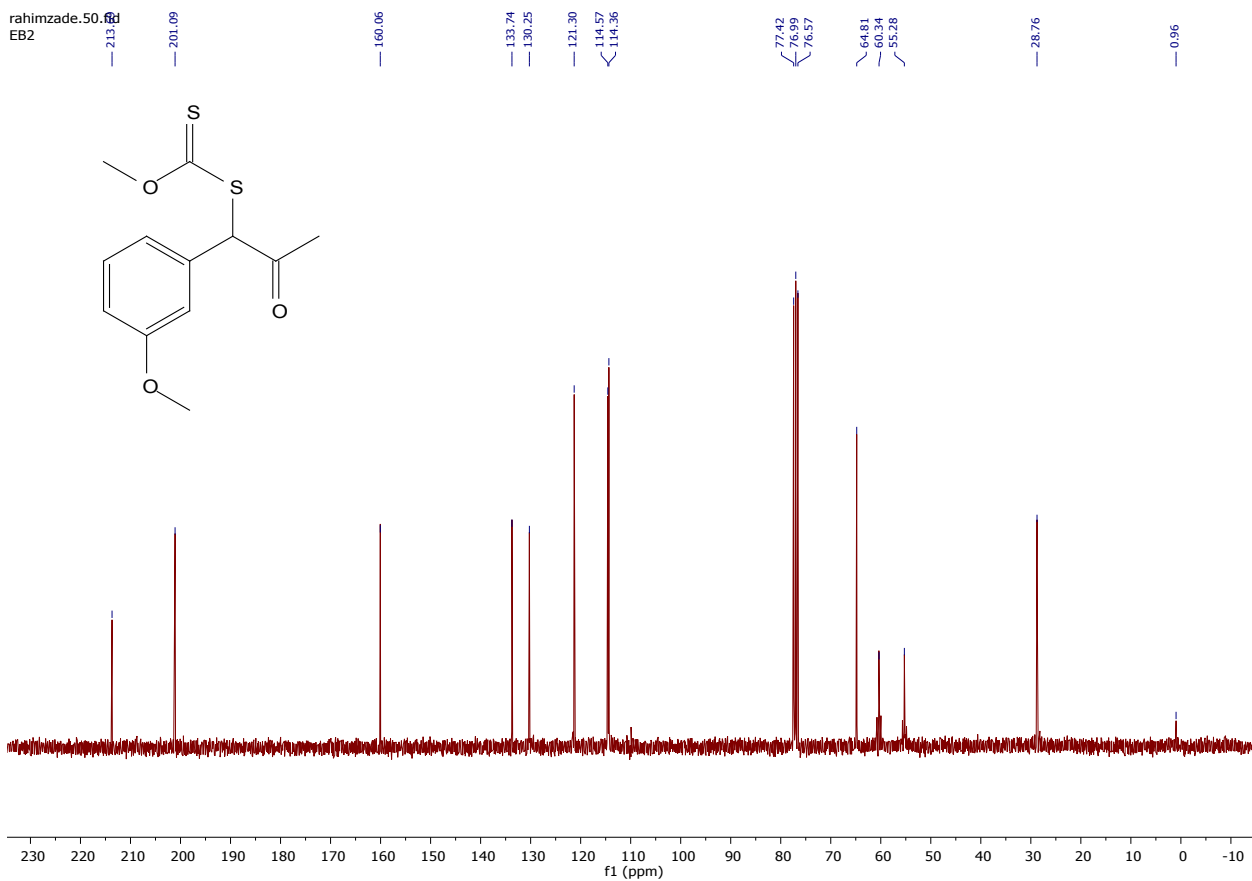

rahimzade.13.fid  
EX1

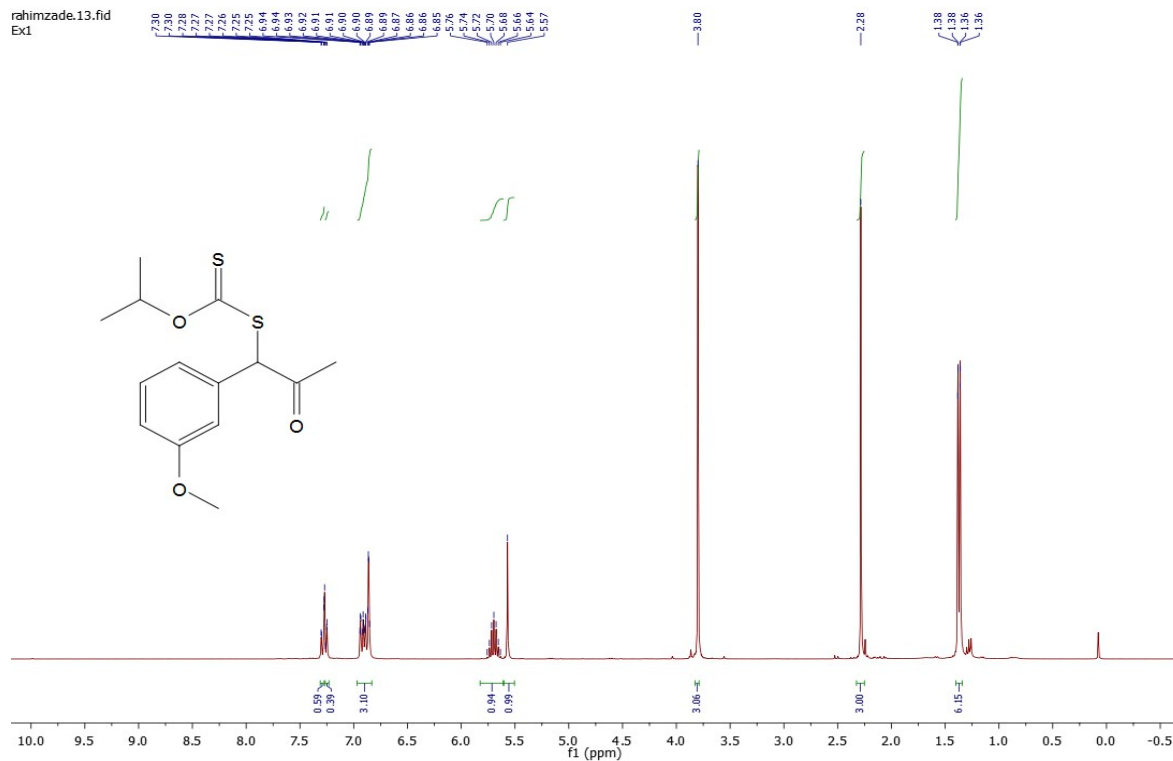

rahimzade.16.fid  
EX1

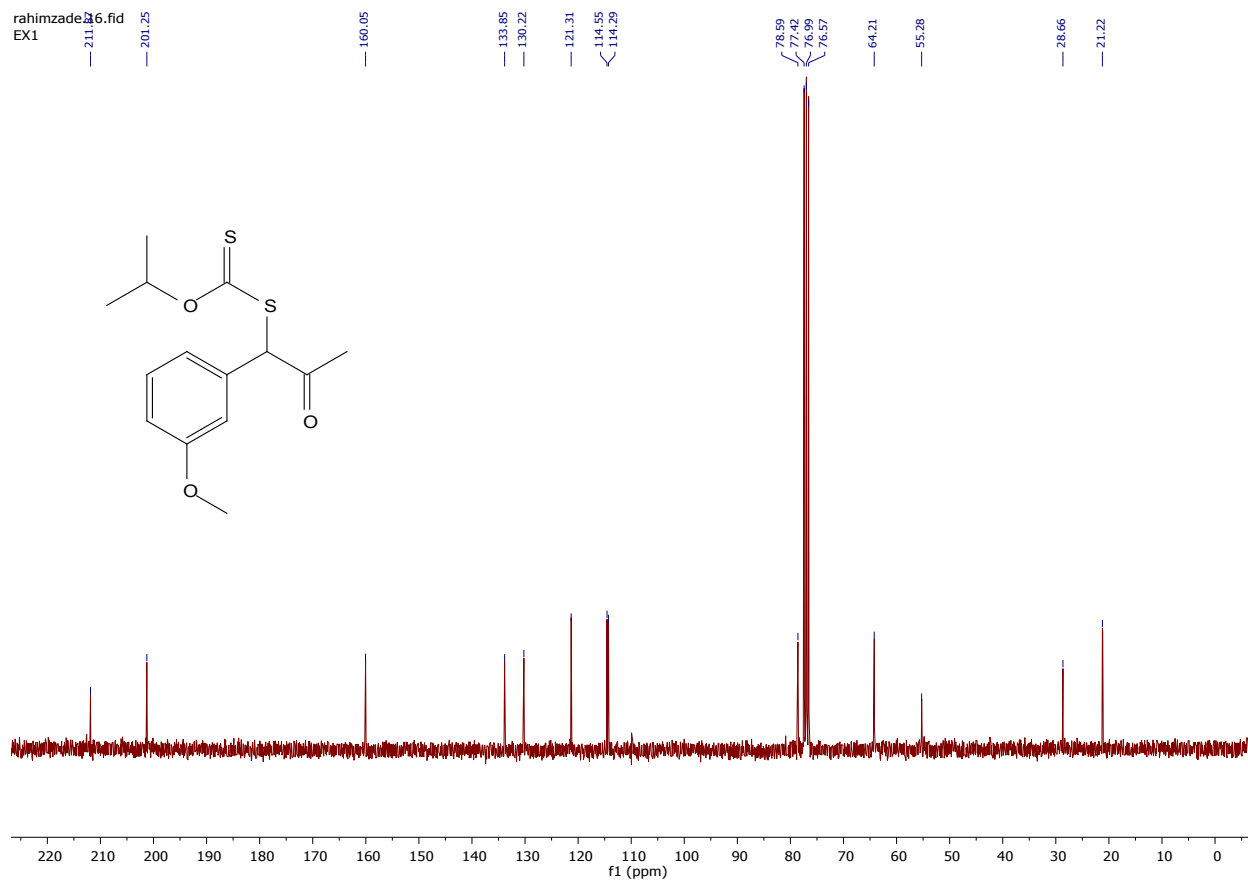

rahimzade.9.fid  
EX2

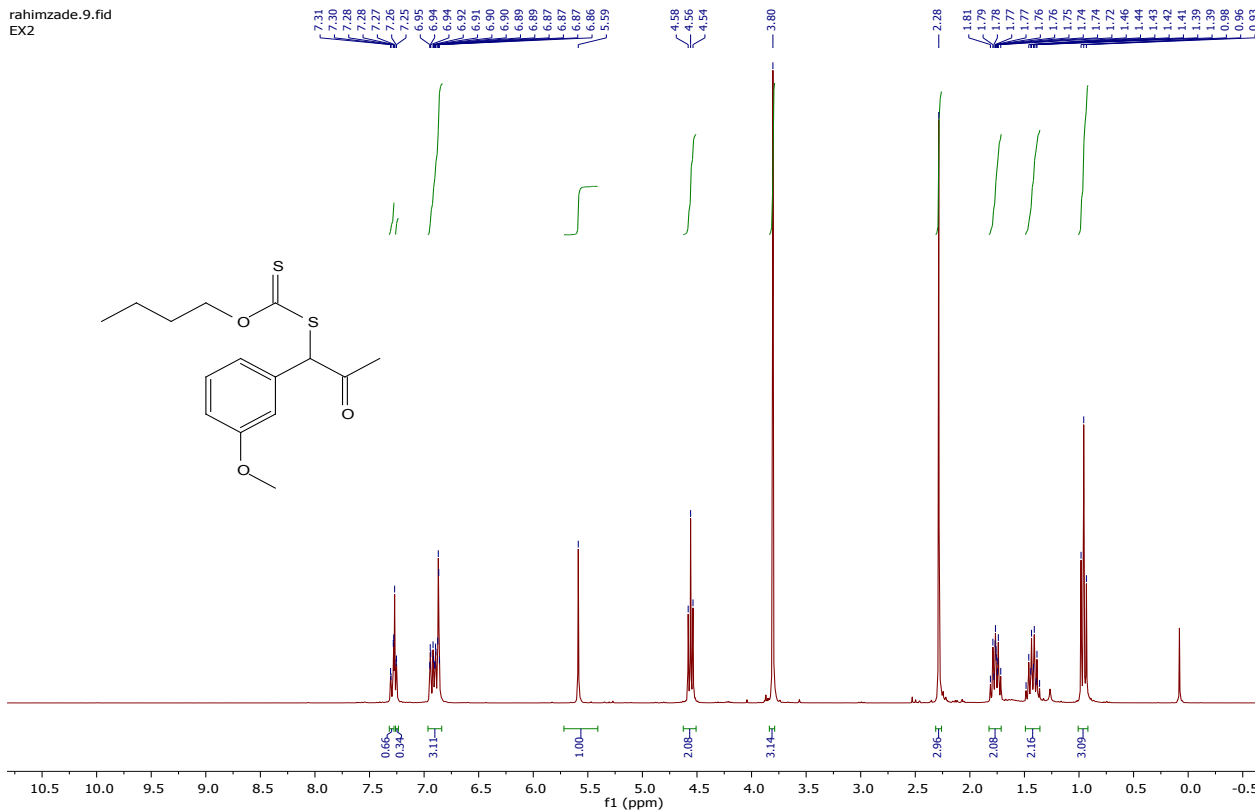

rahimzade.11.fid  
EX2

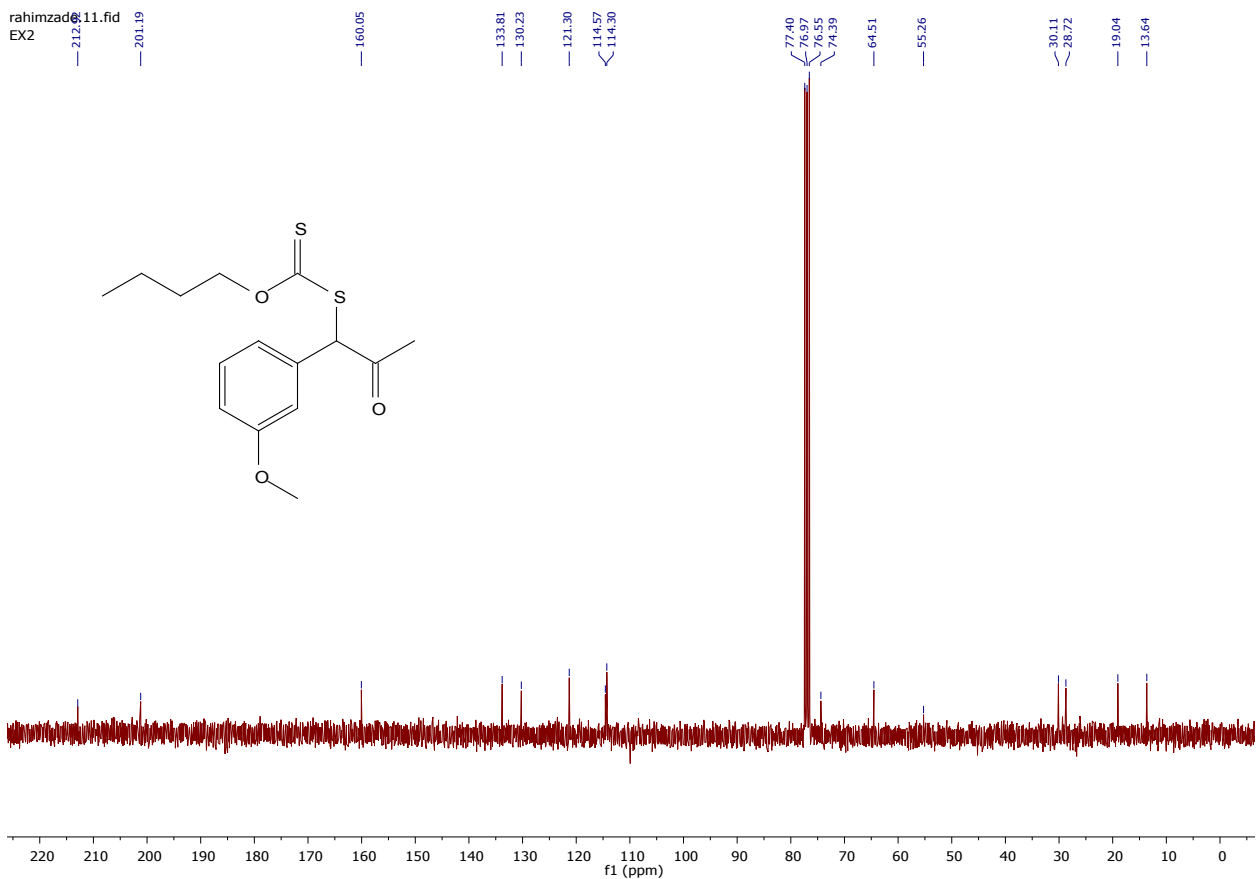

rahimzade.7.fid  
Ex3

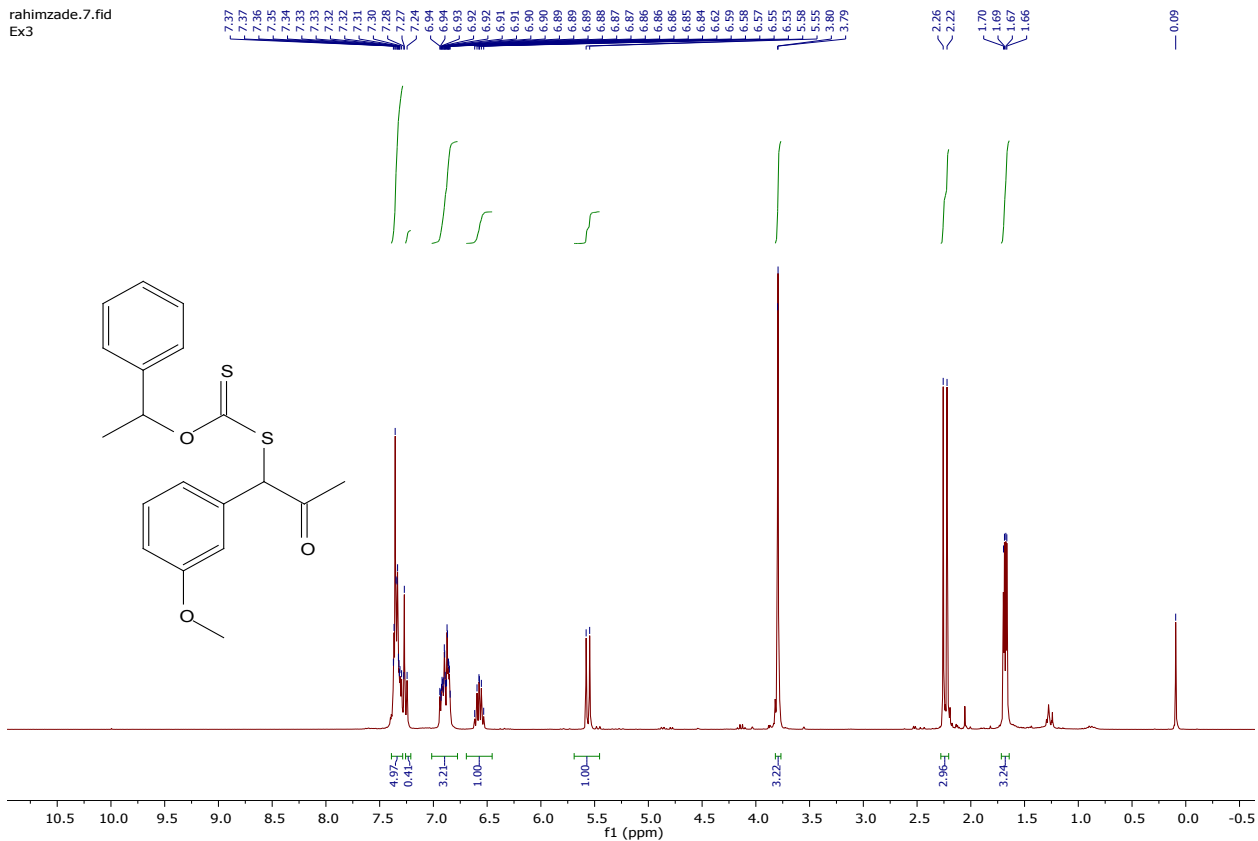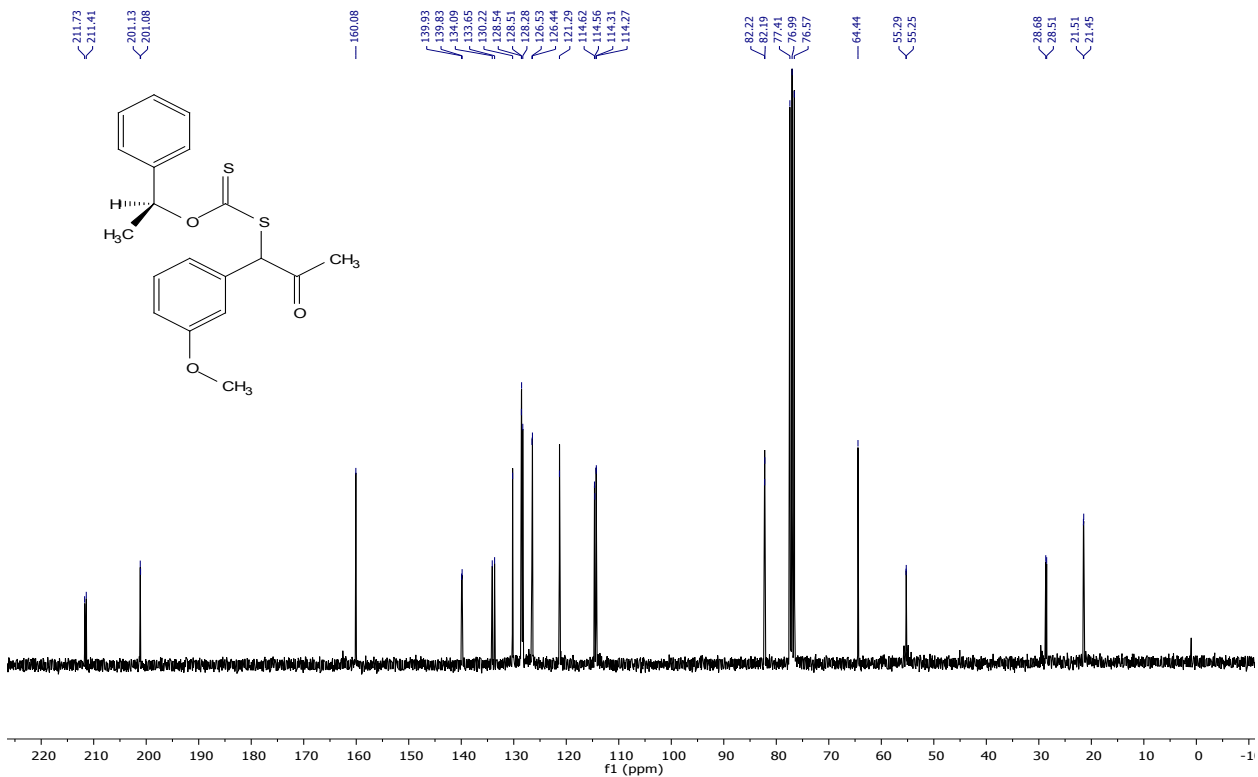

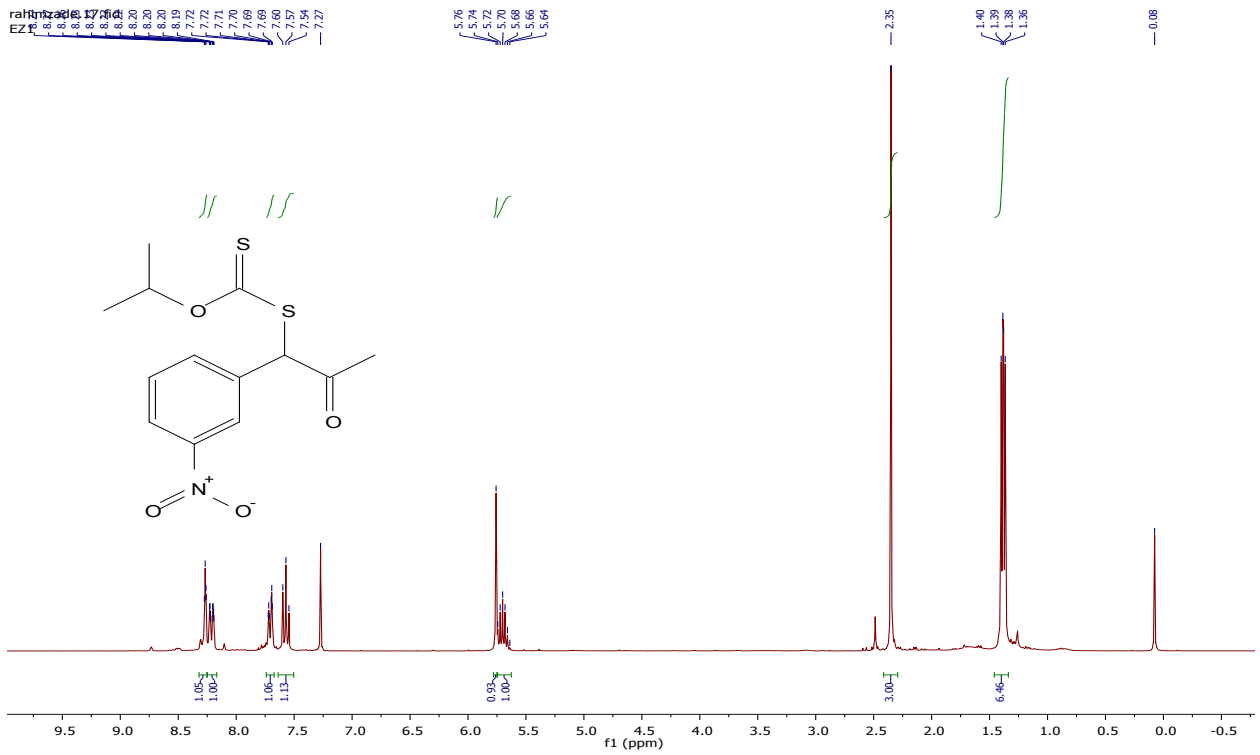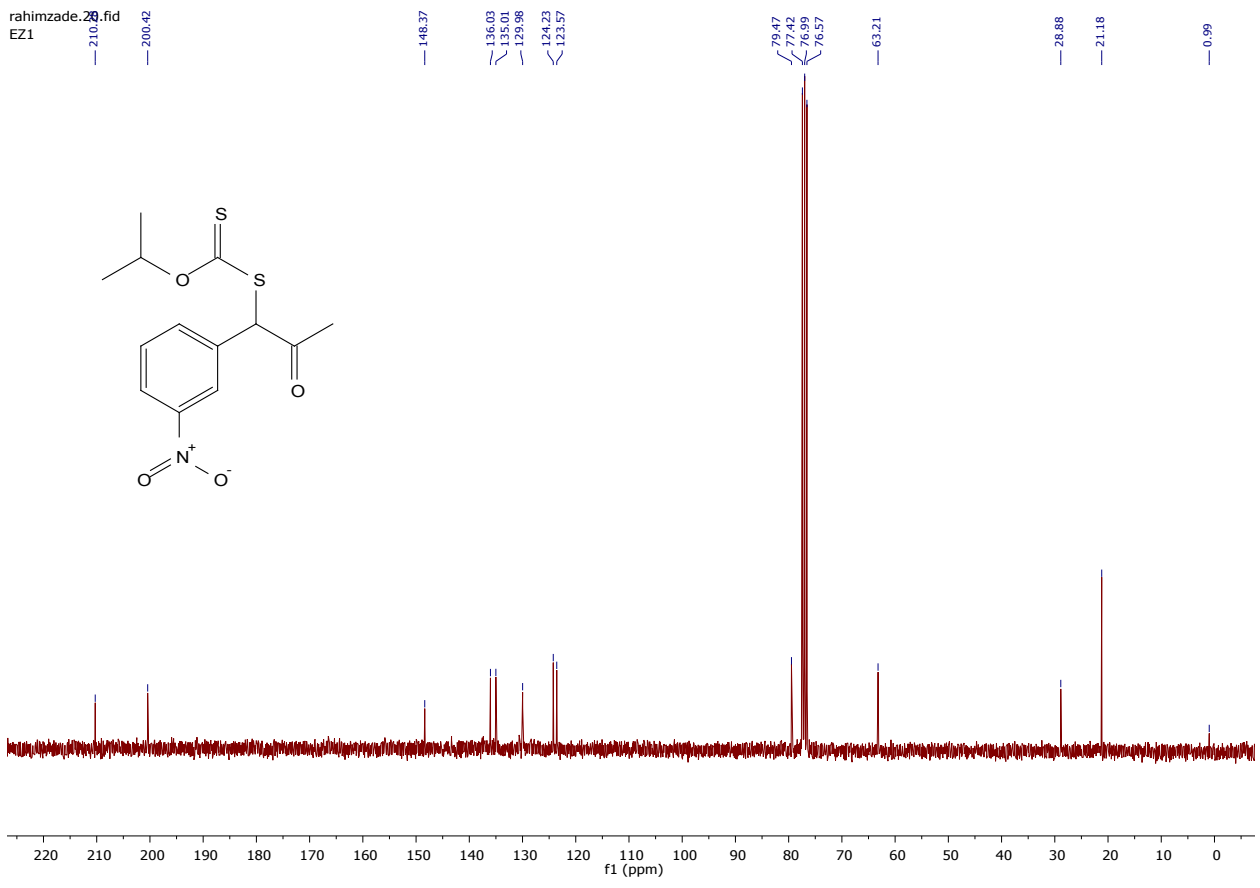

rahimzade.24.02  
EZ2

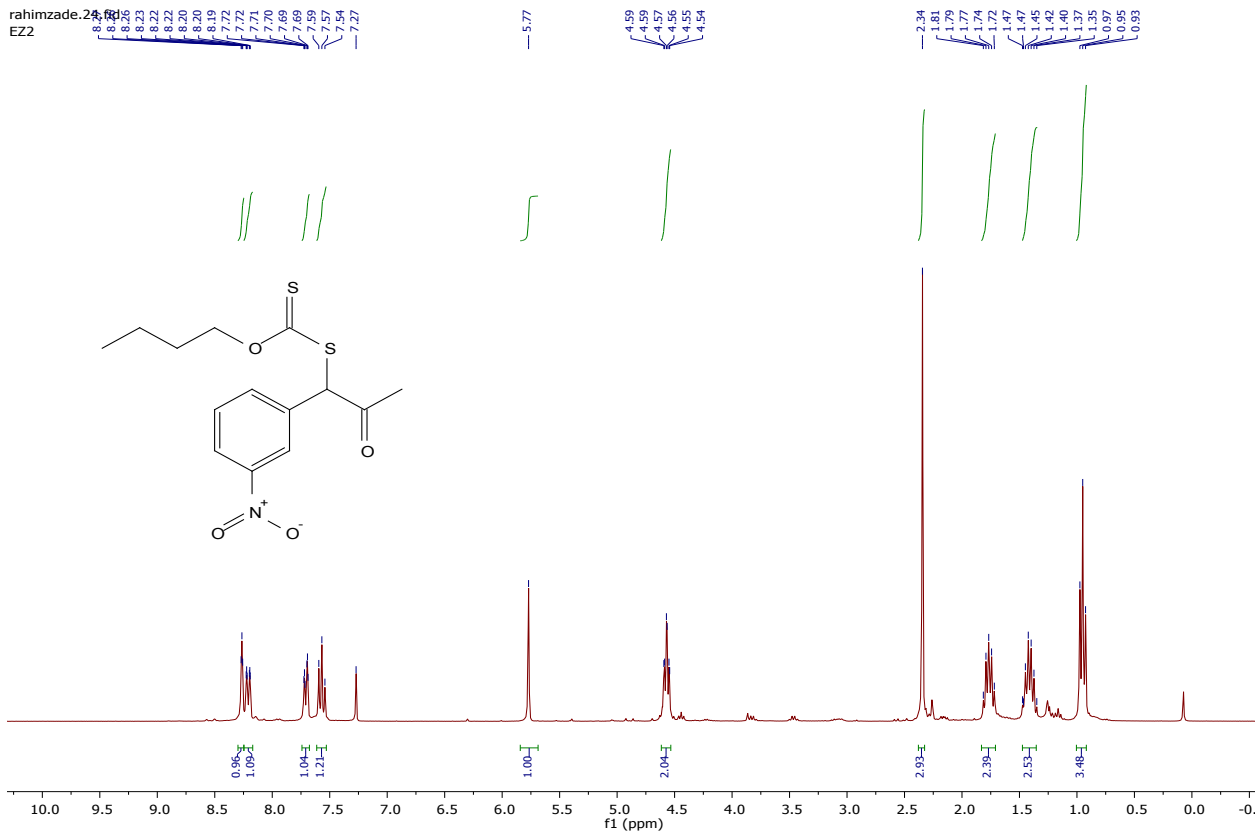



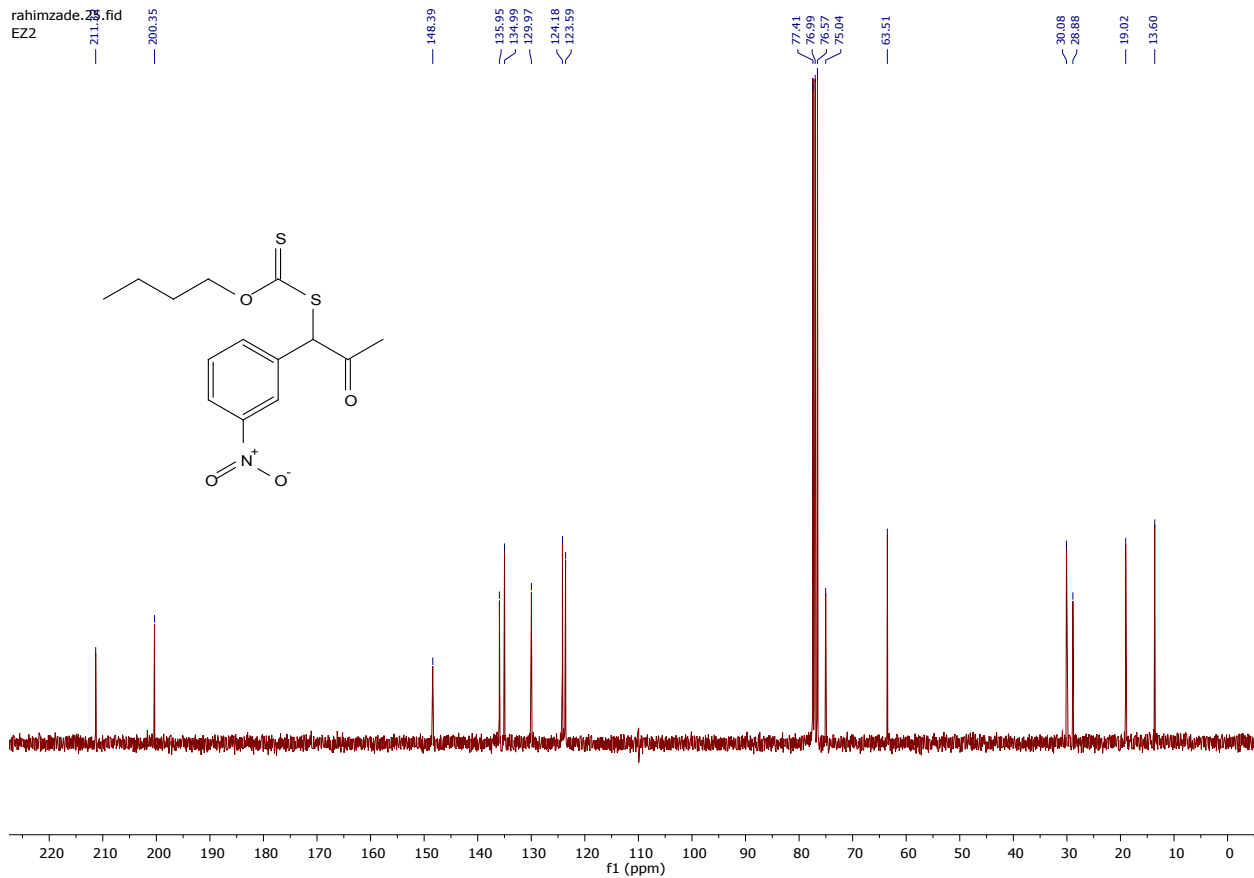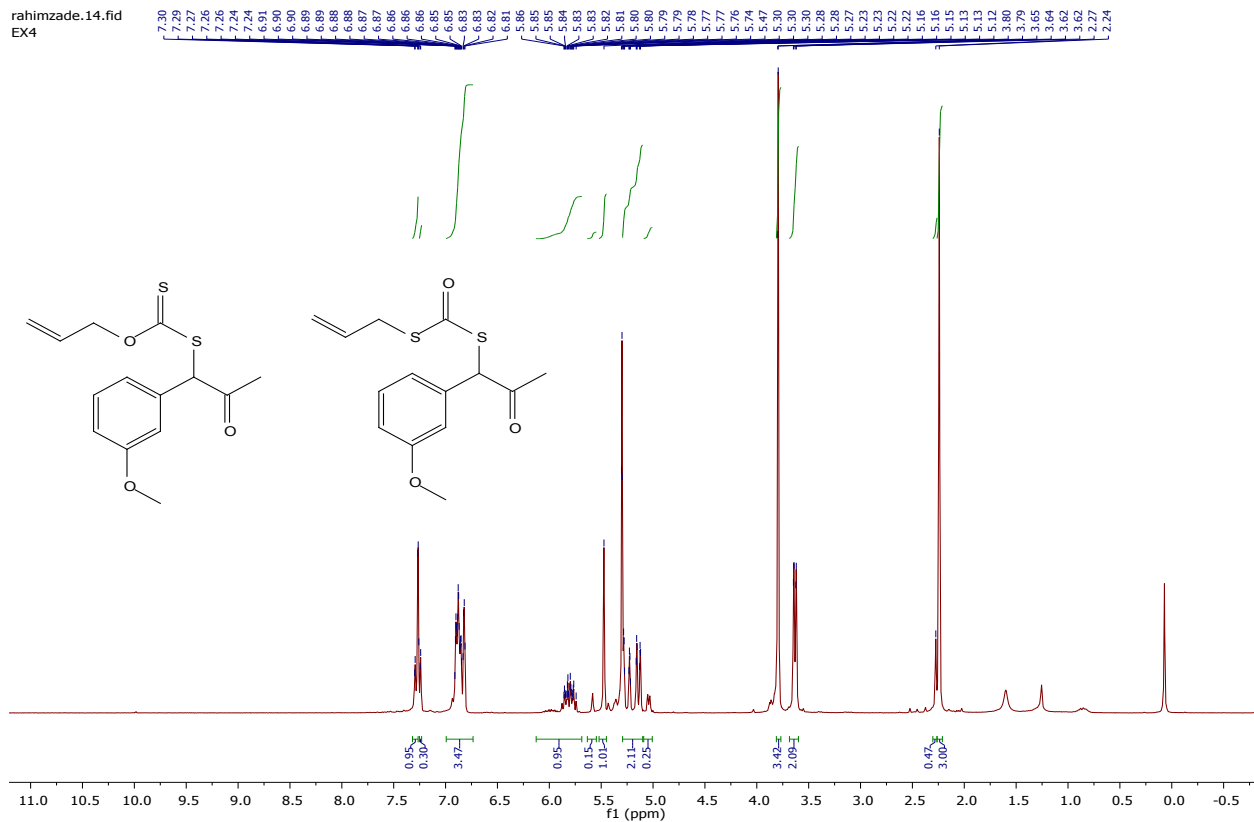

rahimzade.15.fid  
EX4

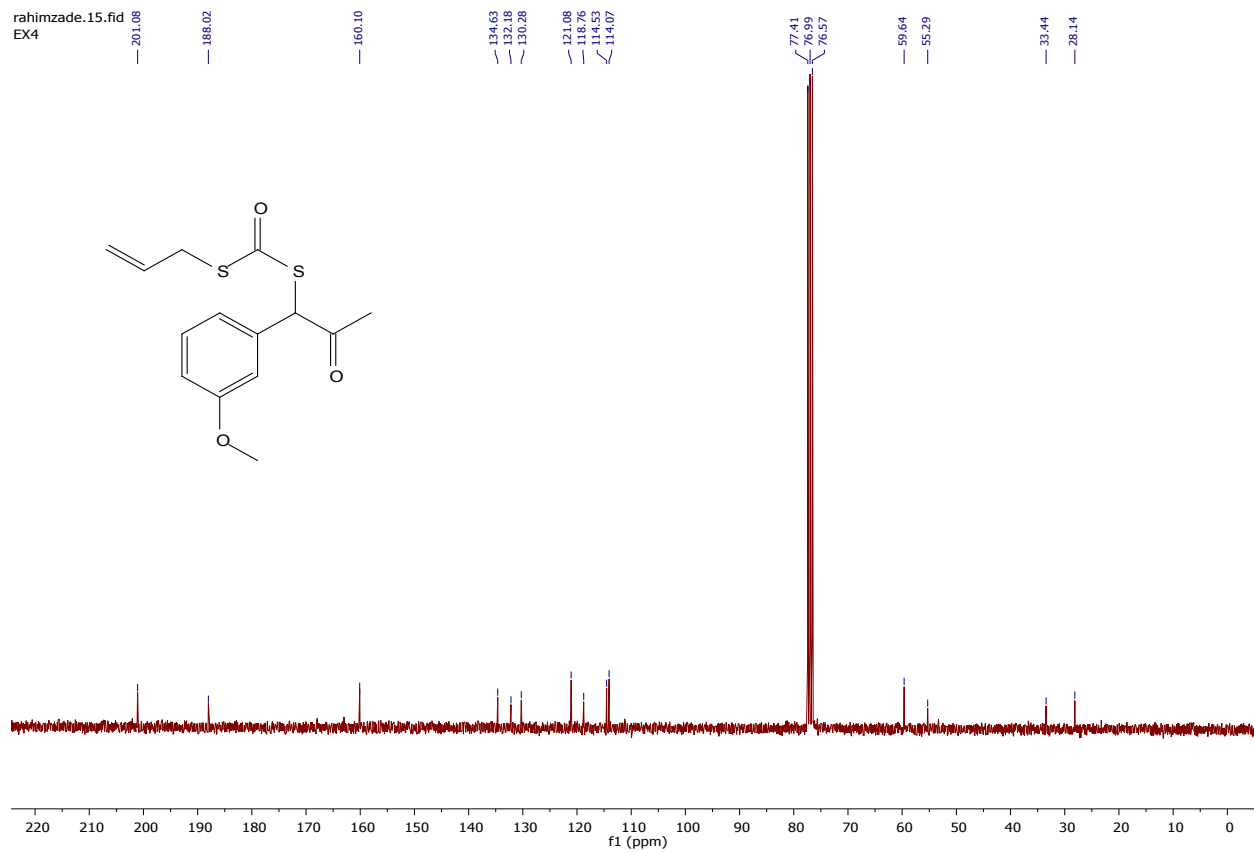

bedali  
NBE1

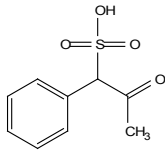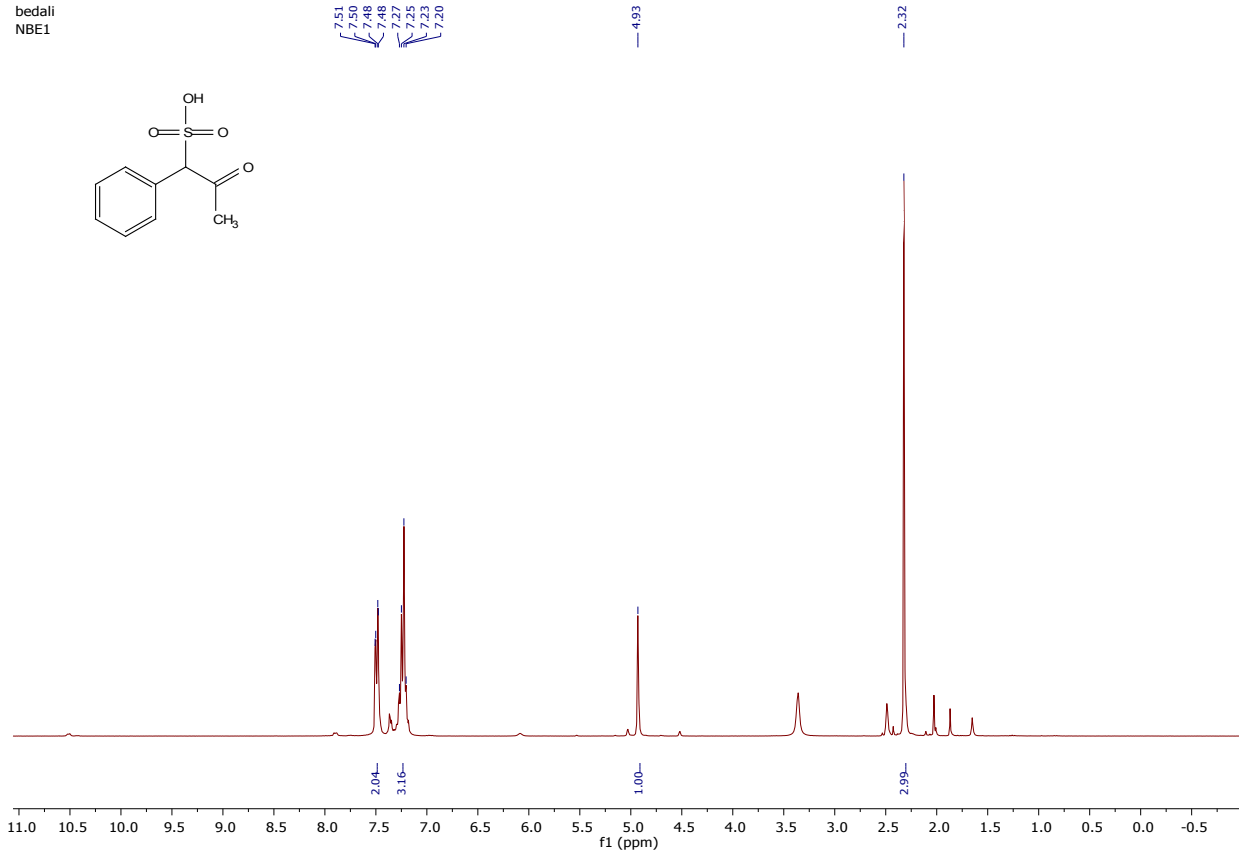

bedali  
NBE1

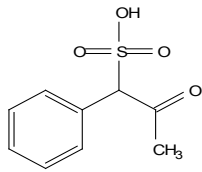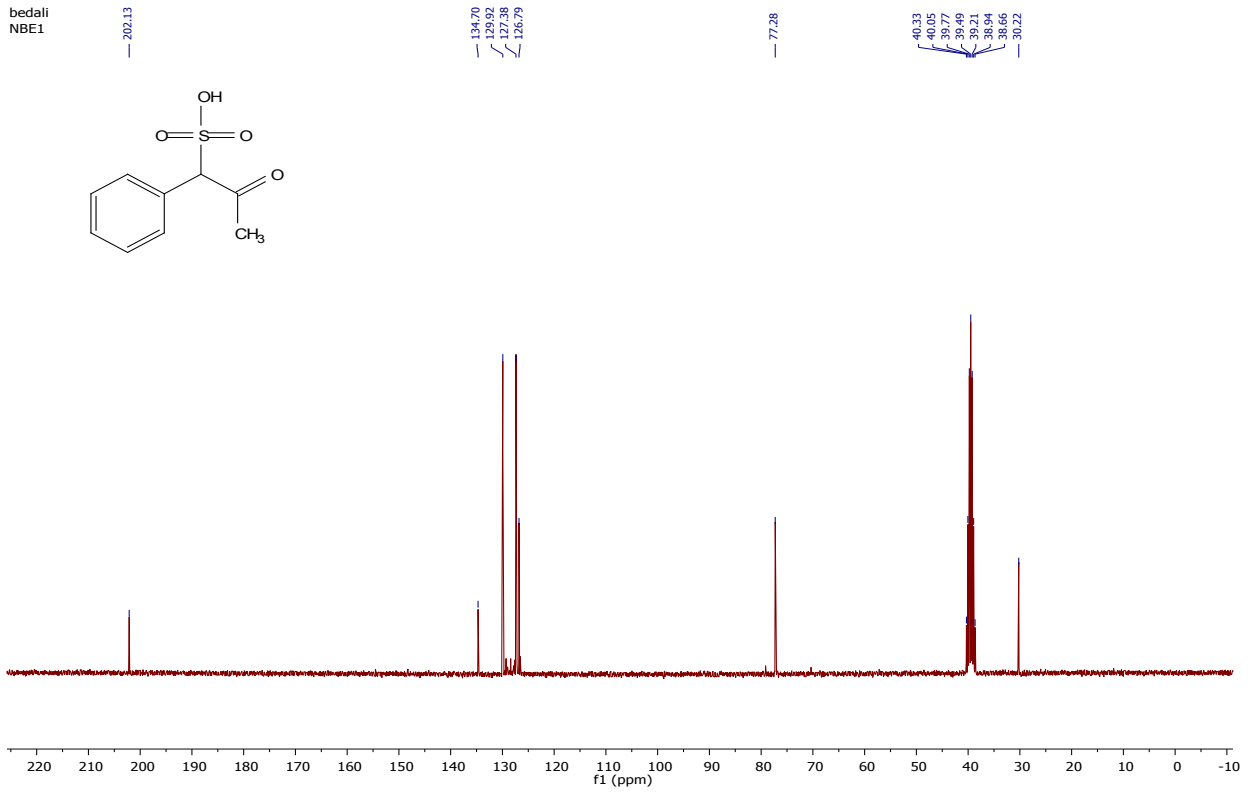

bedali  
NBEZ'

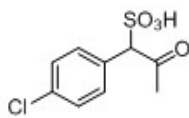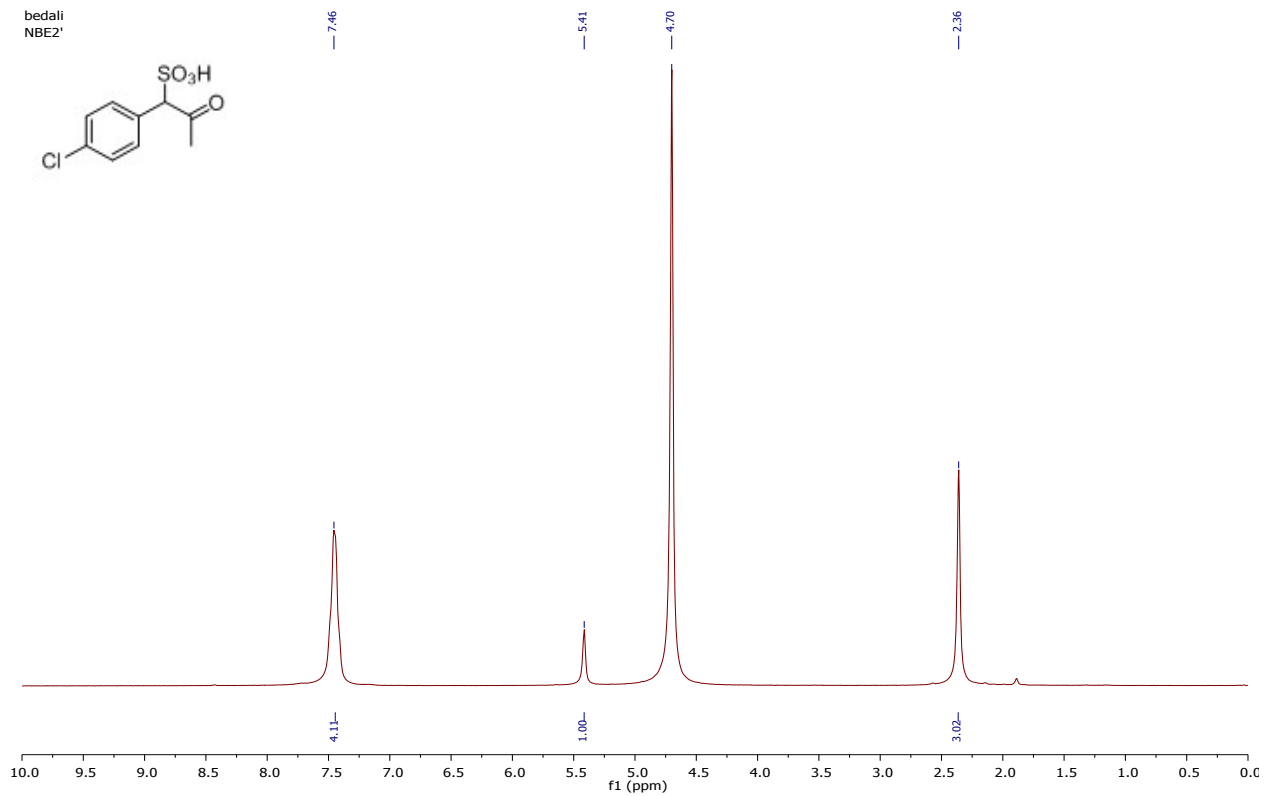

bedali  
NBEZ'

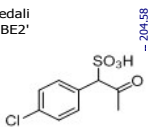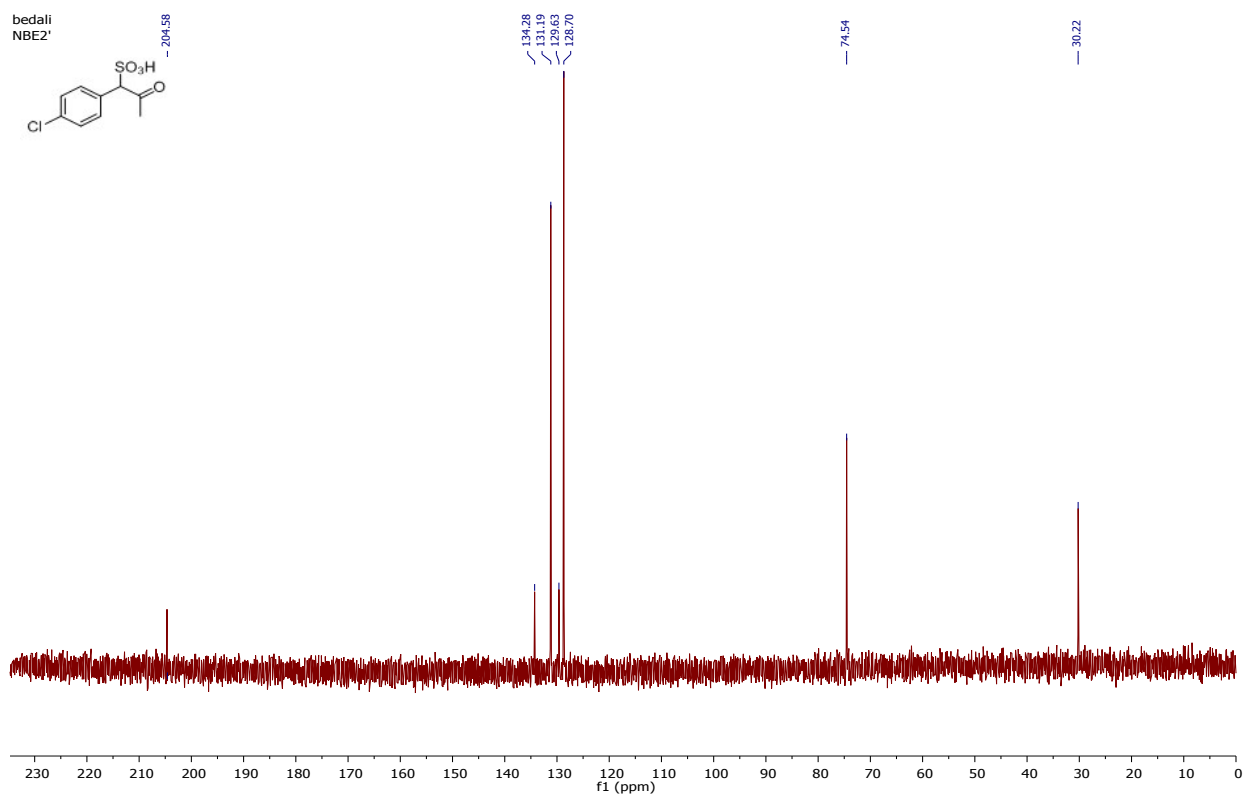

bedali  
NBE3'

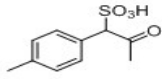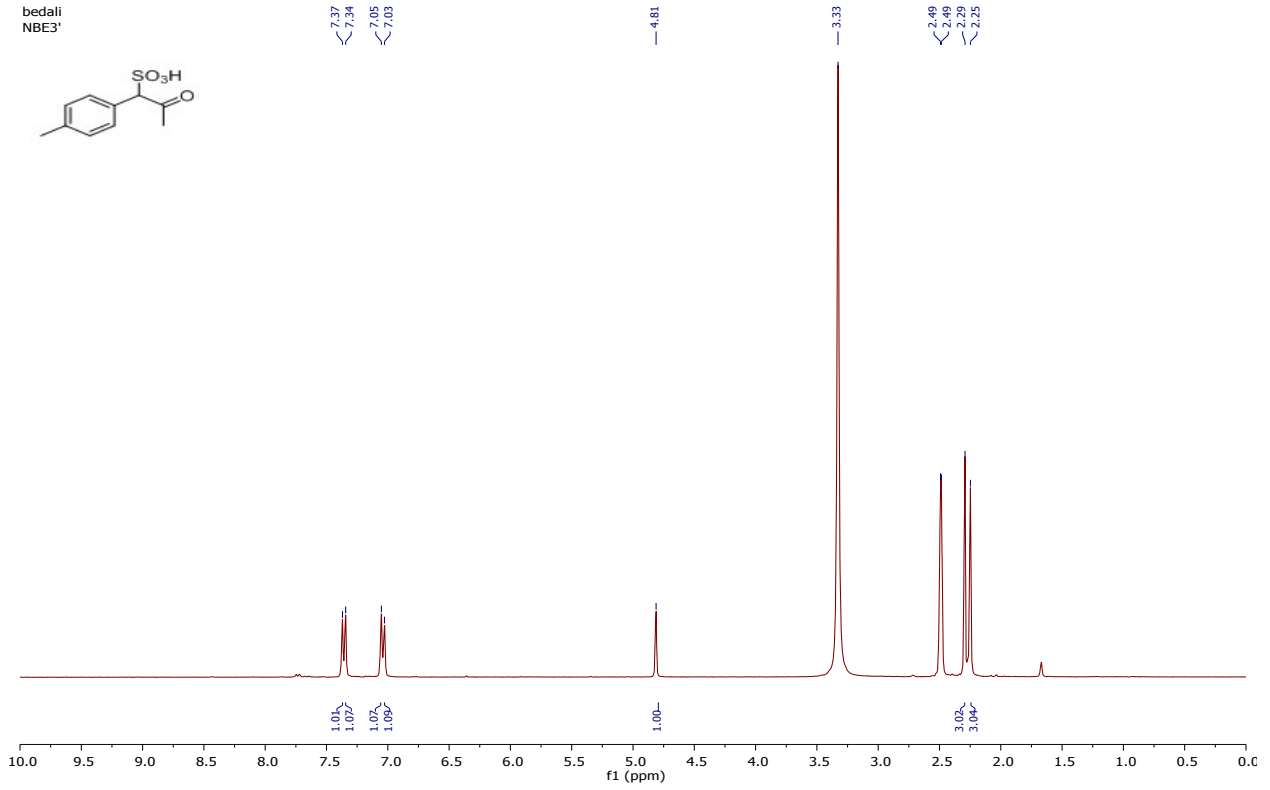

bedali  
NBE3'

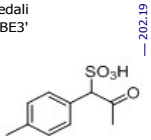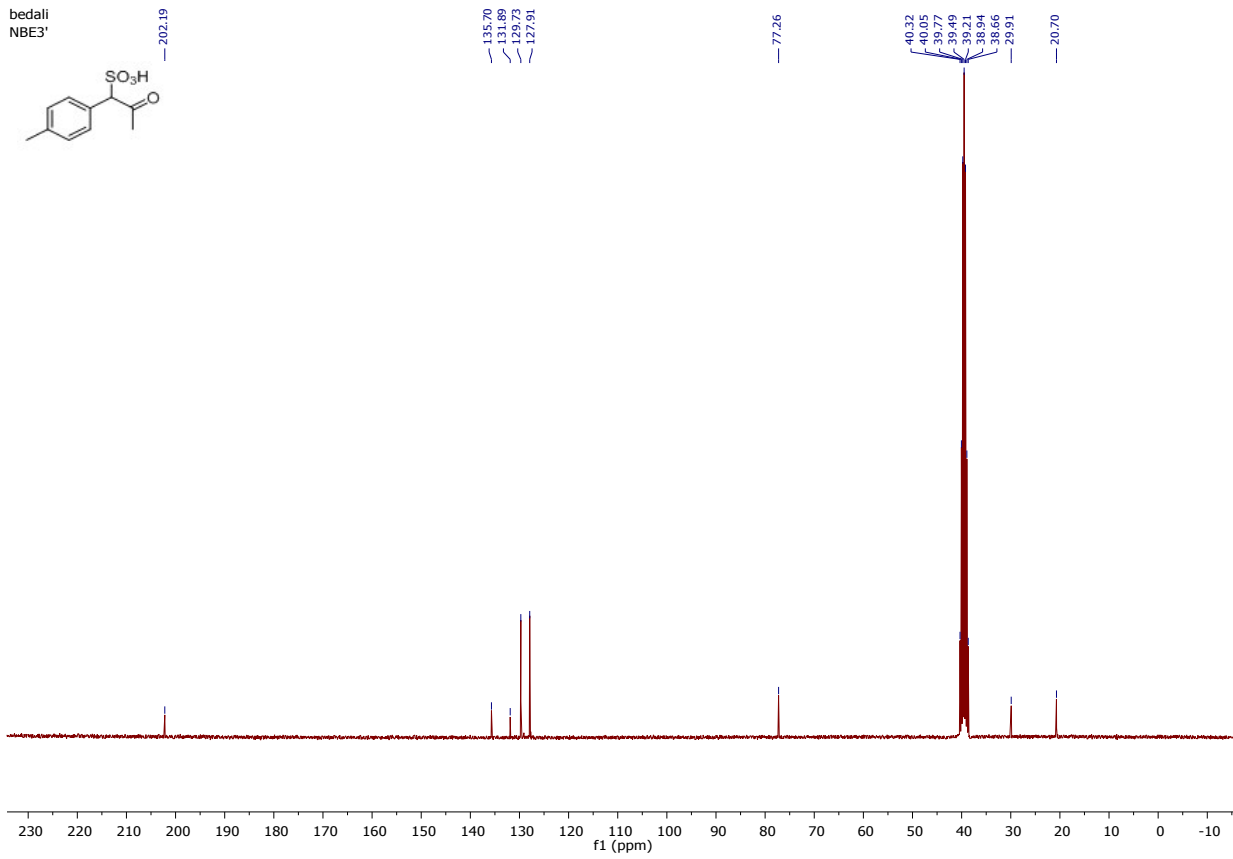

bedali  
NBE4

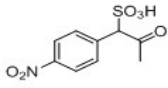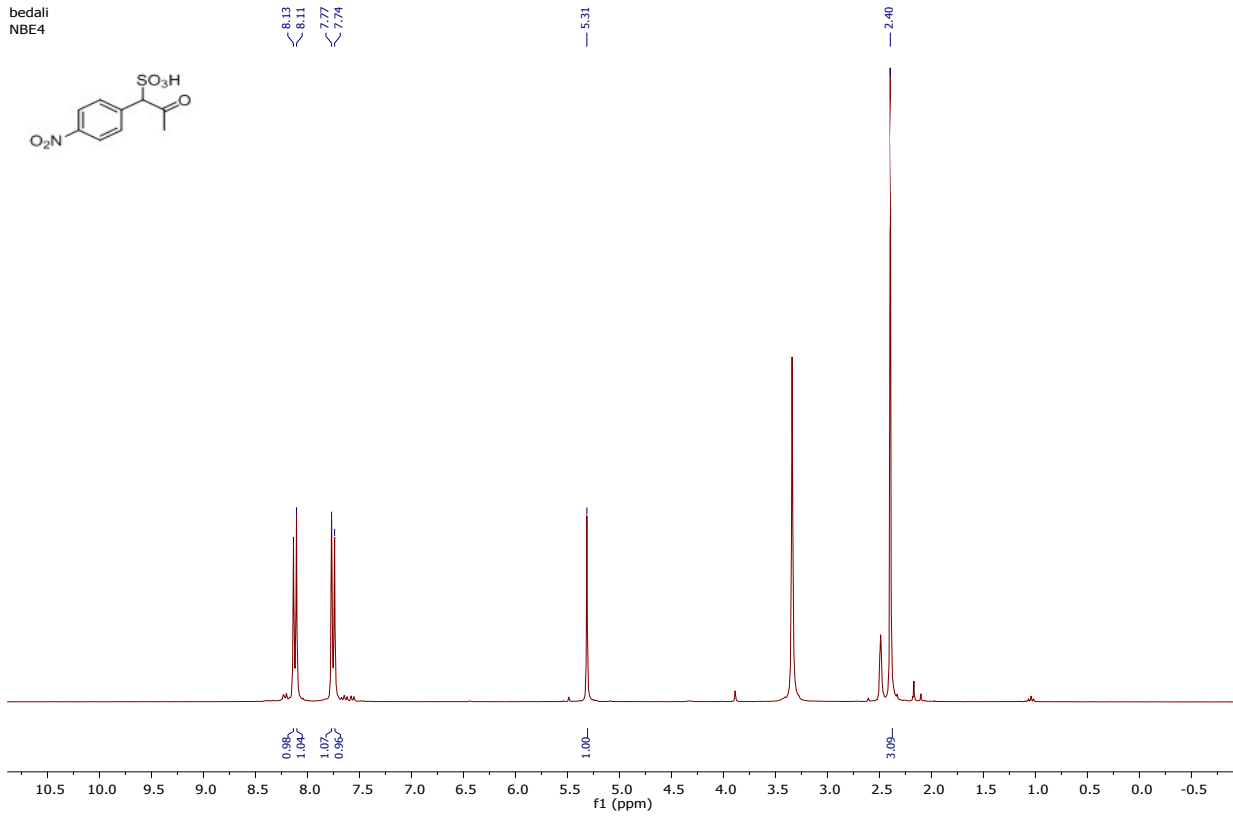

bedali  
NBE4

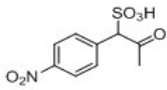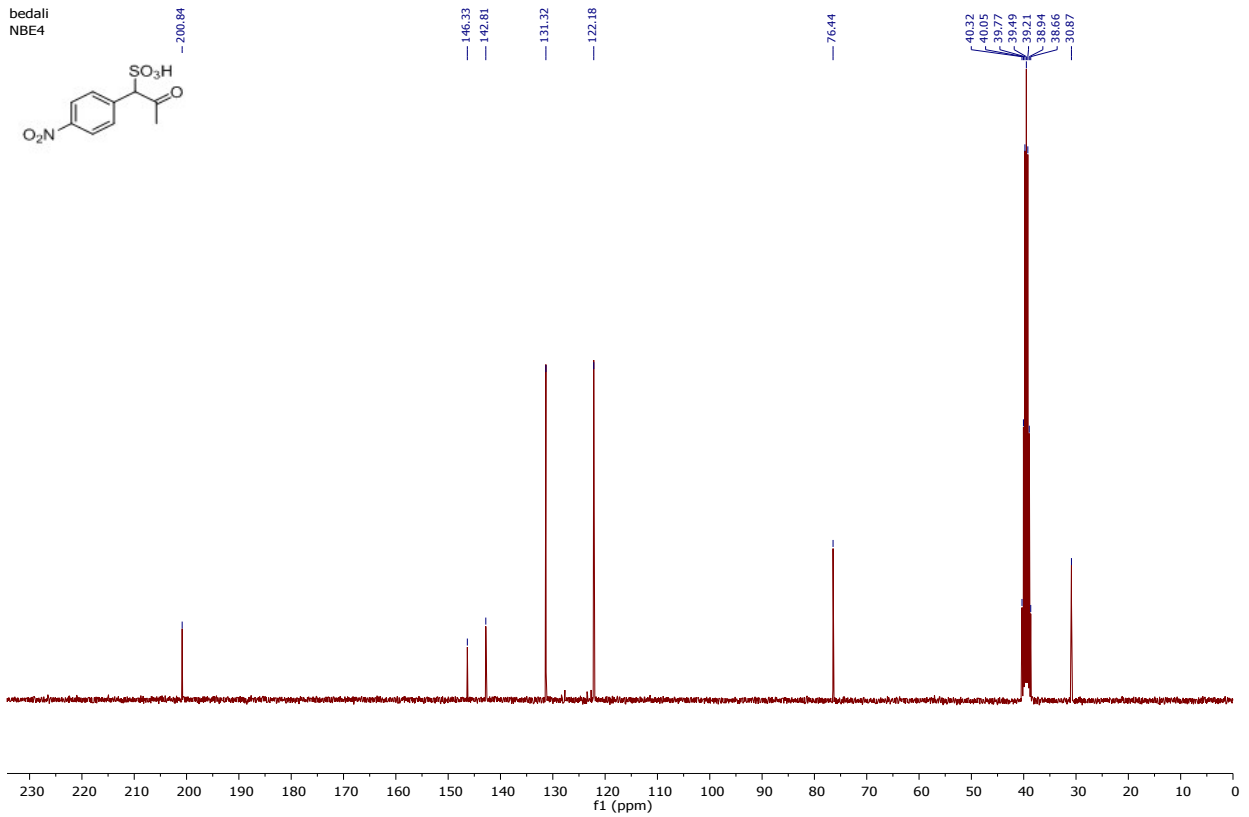

bedali  
NBE5

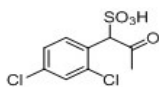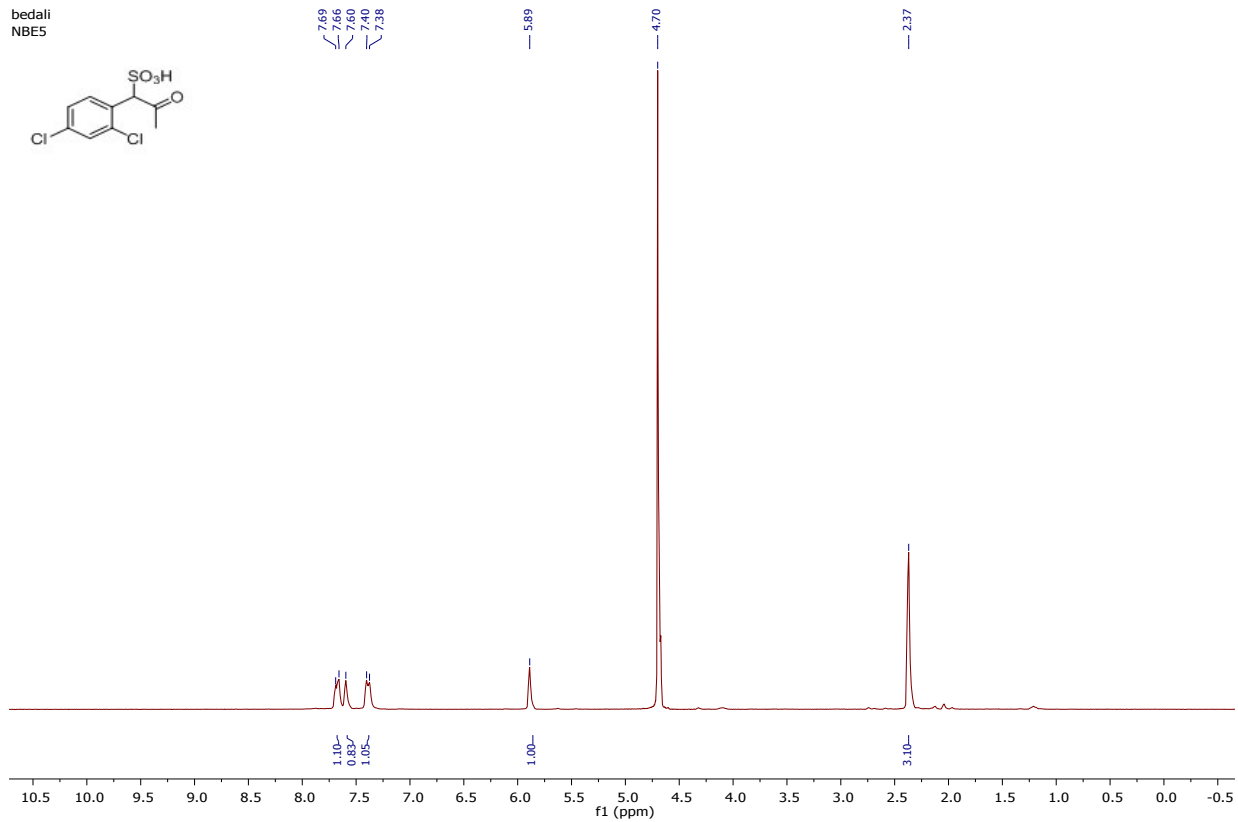

bedali  
NBE5

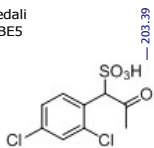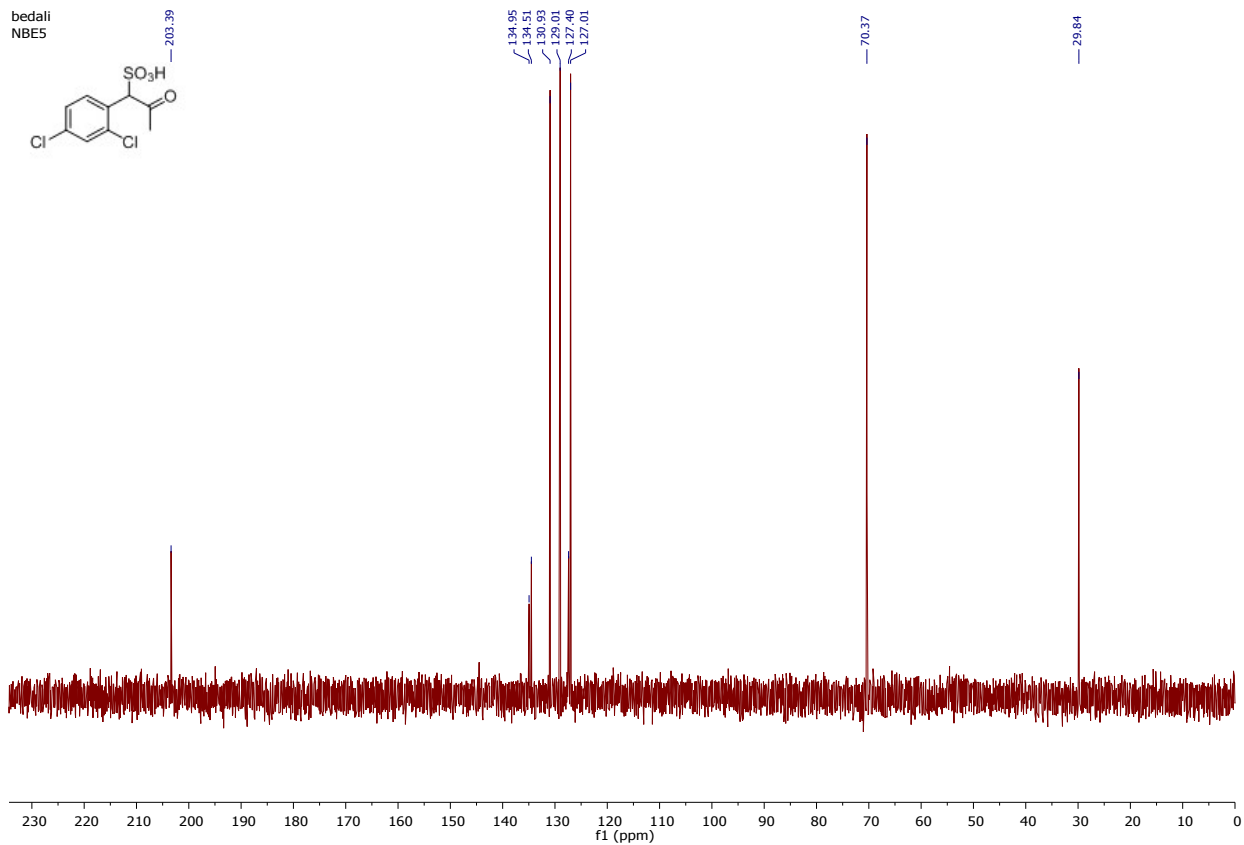

bedali  
NBE12'

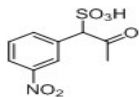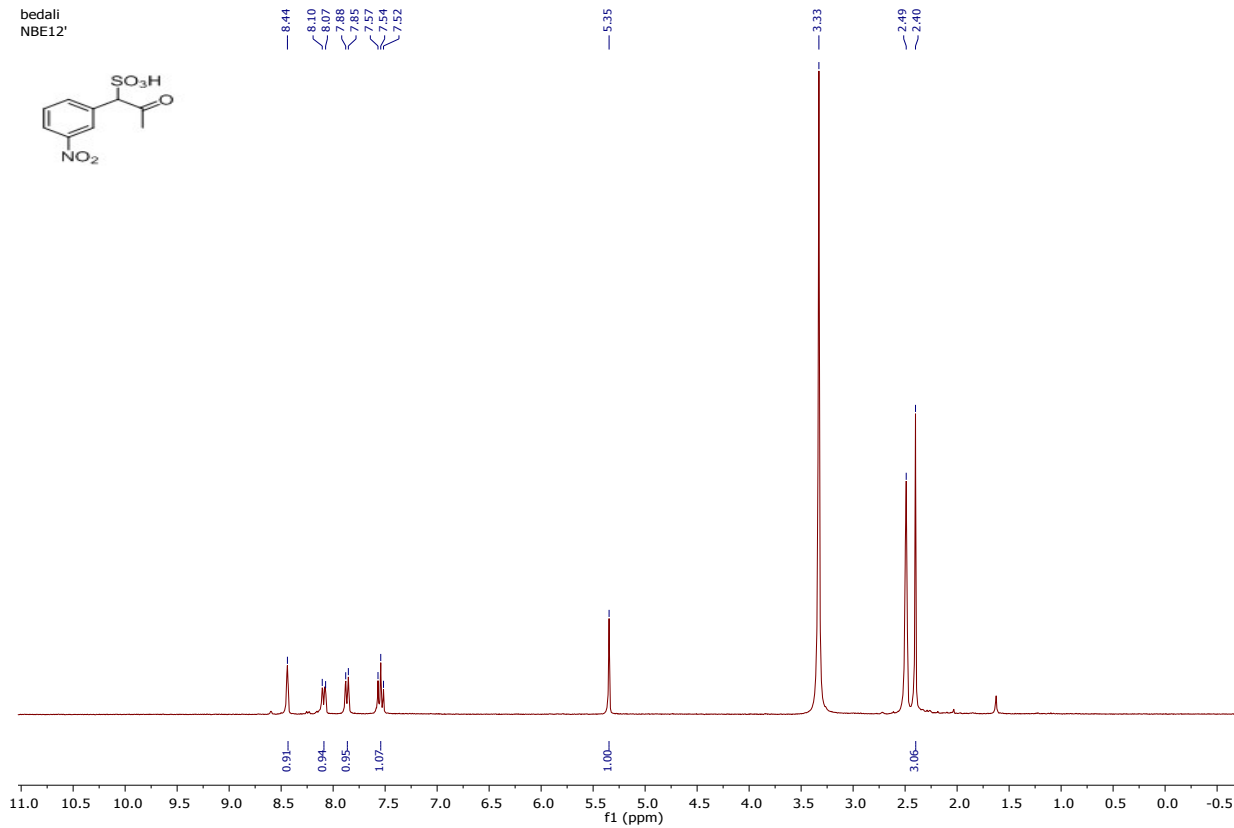

bedali  
NBE12'

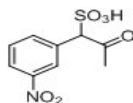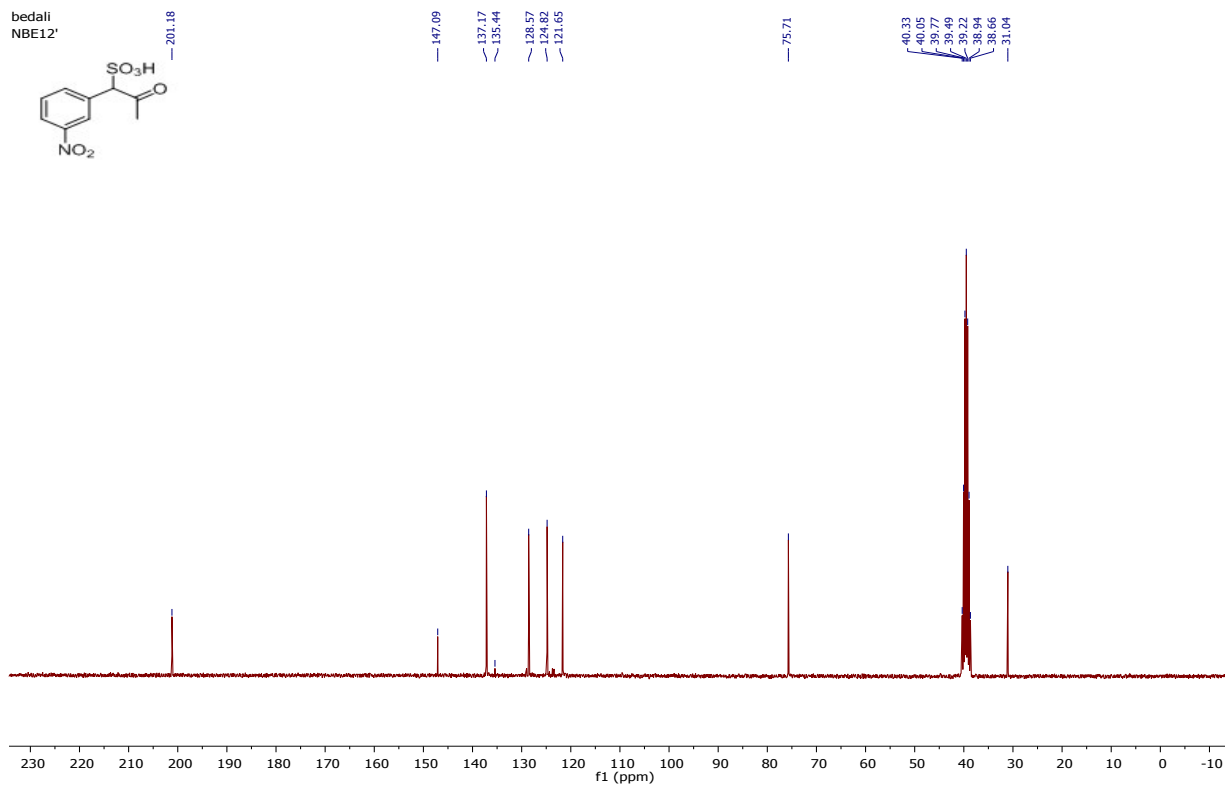



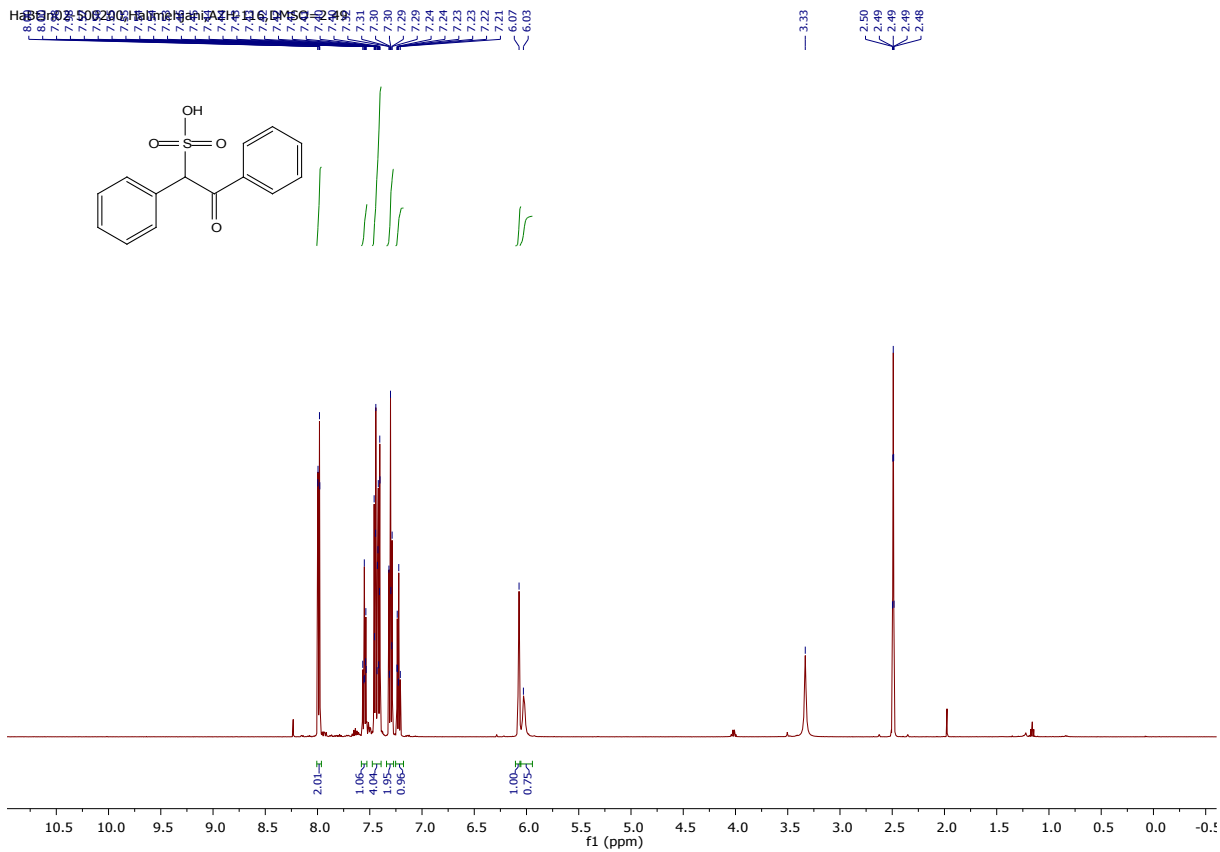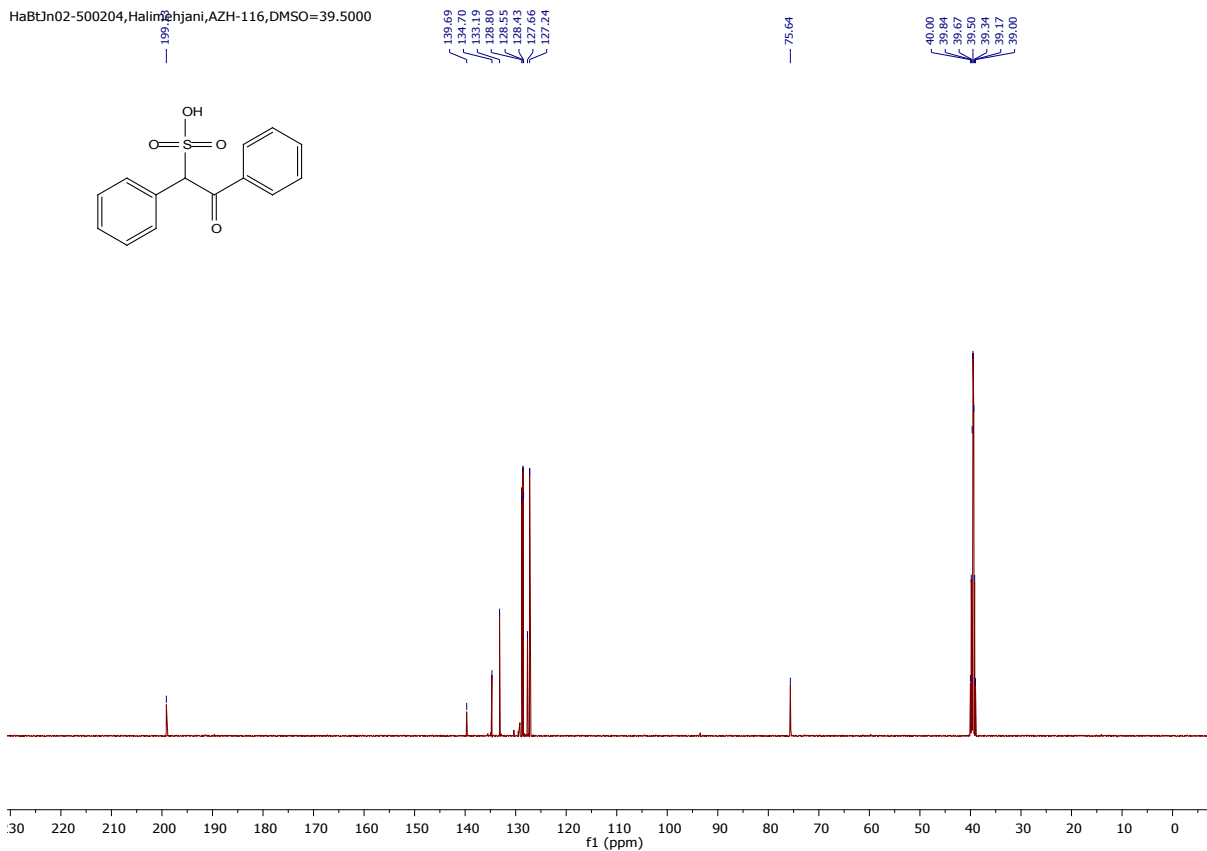

bedali  
NBE6

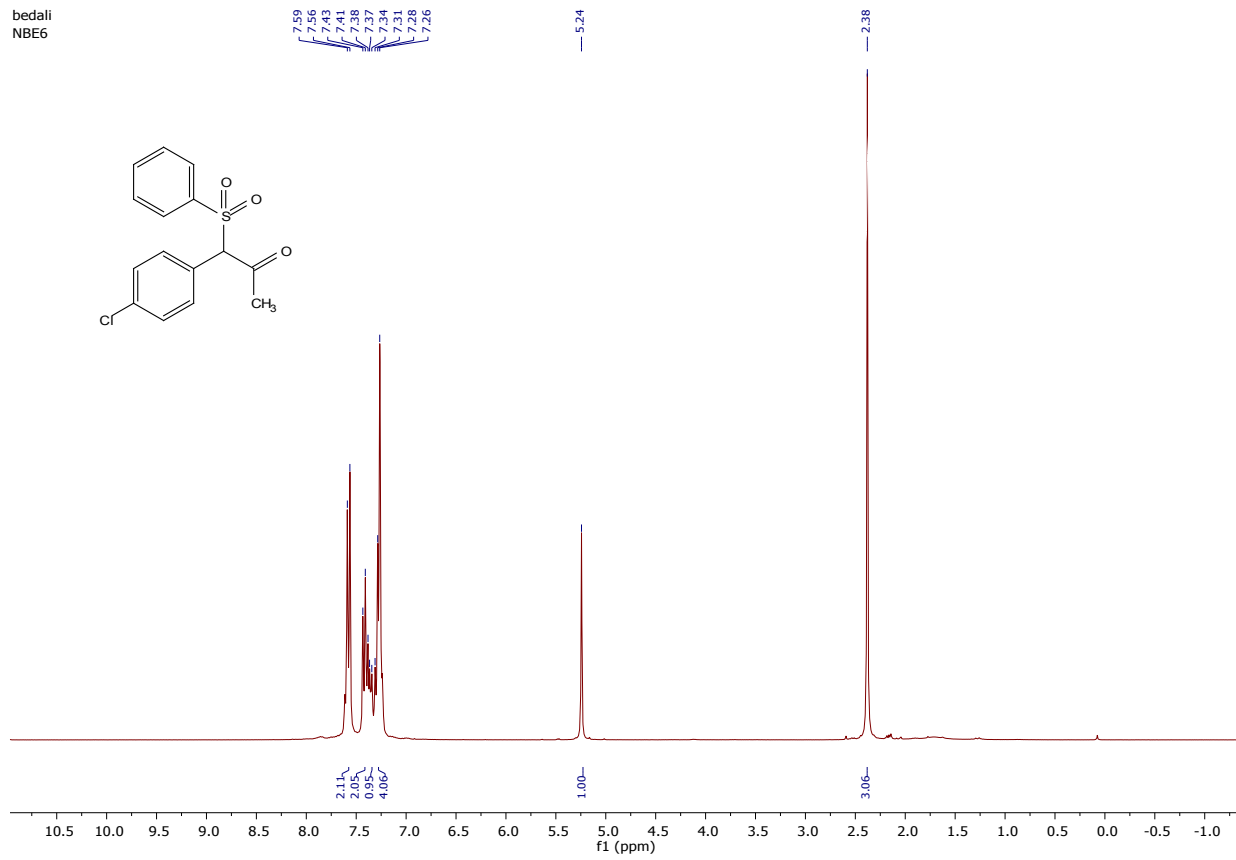

bedali  
NBE6

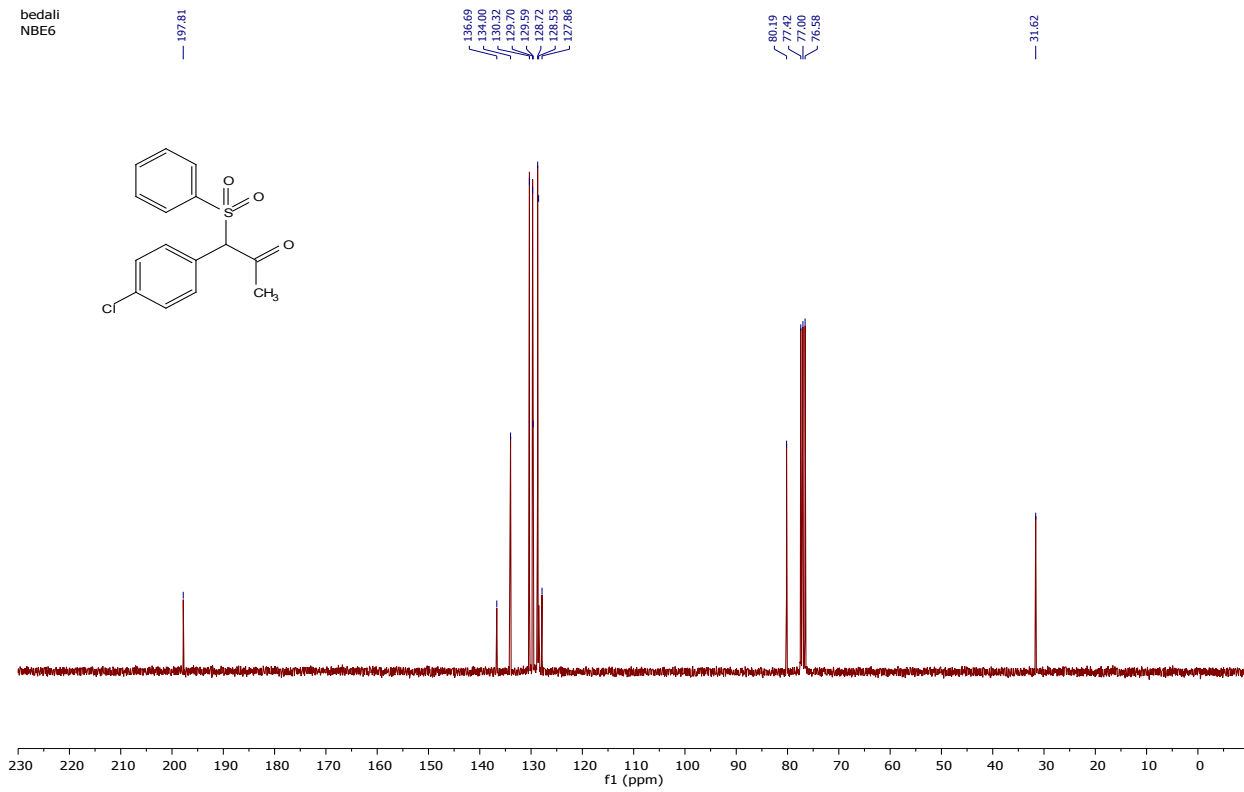

bedali  
NBE7

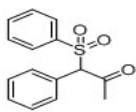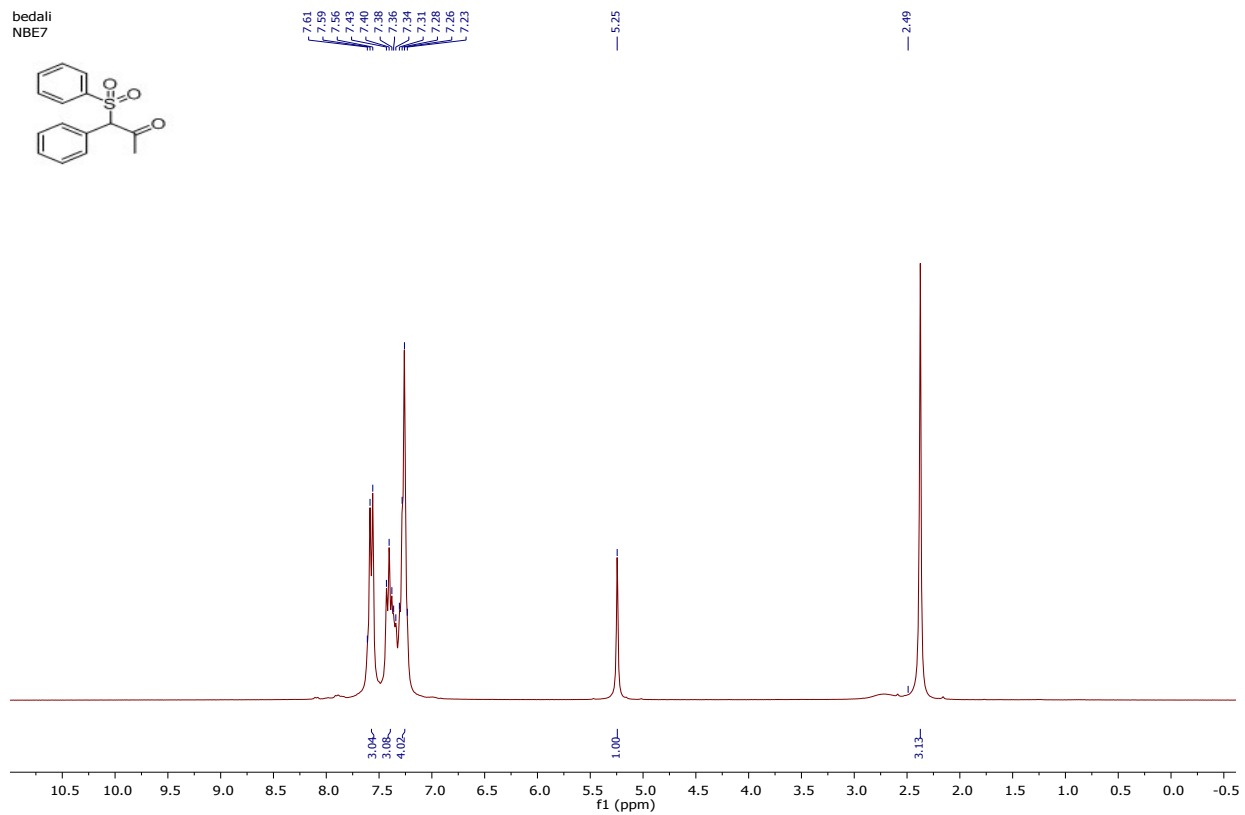

bedali  
NBE7

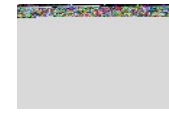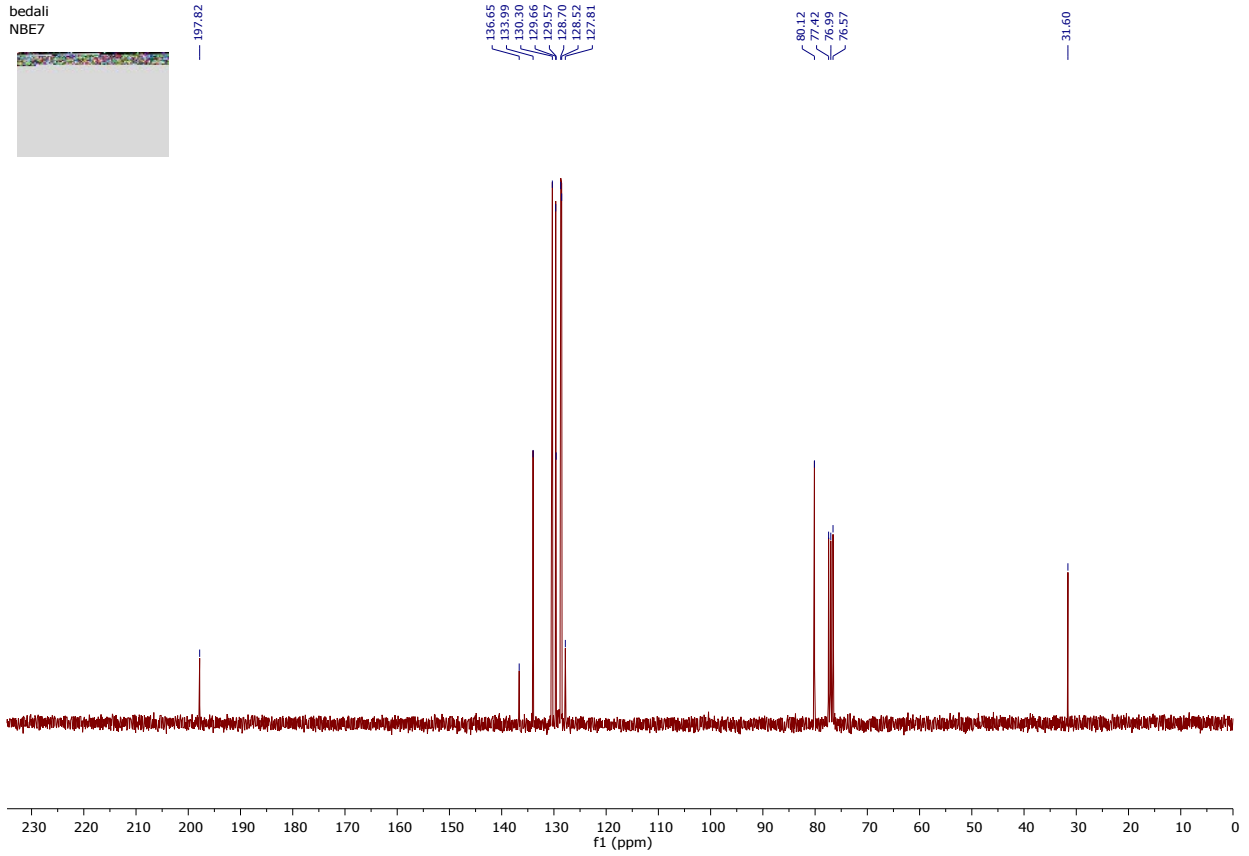

bedali  
NBE8

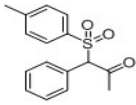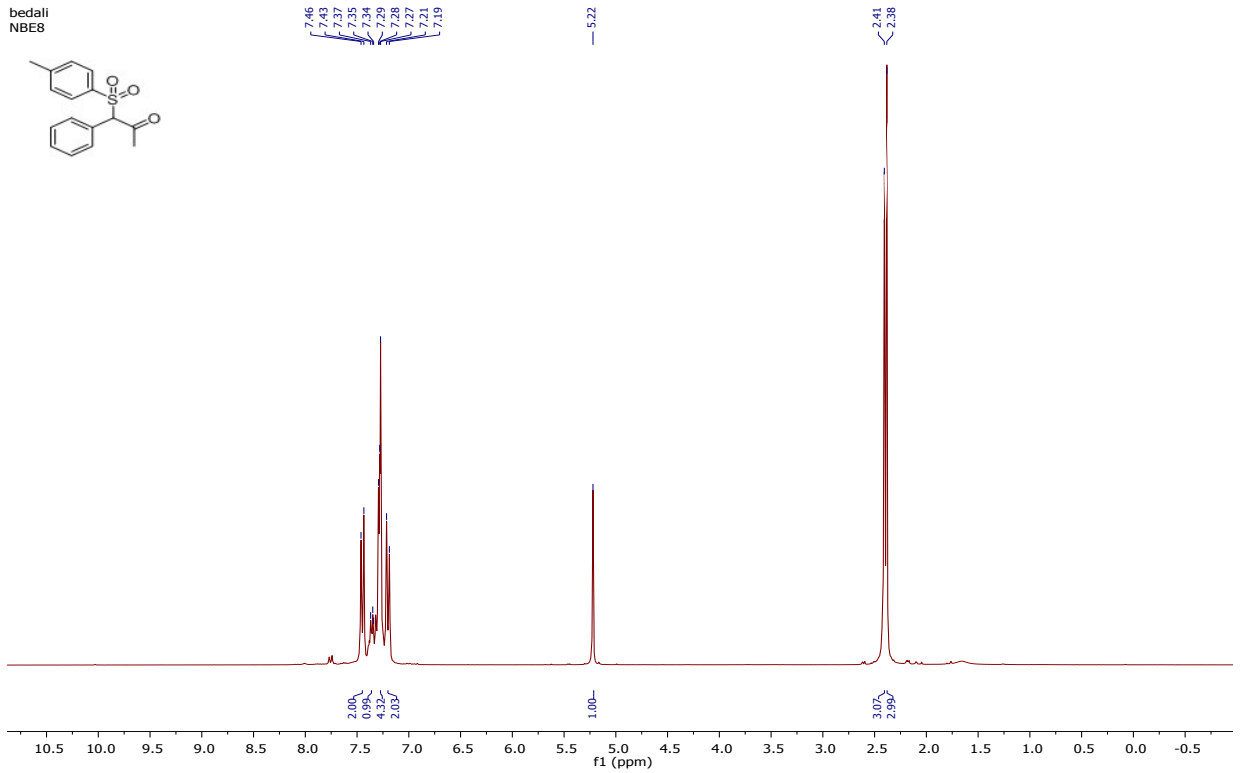

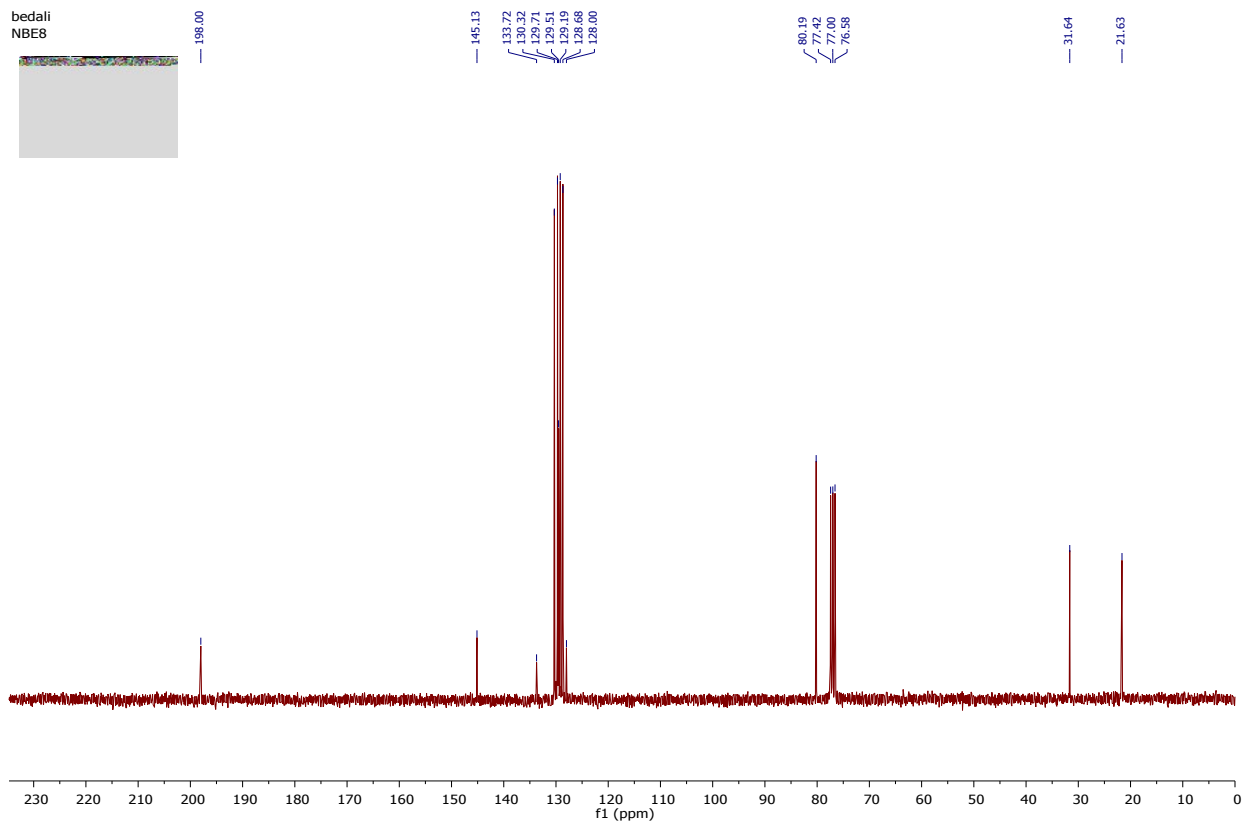

bedali  
NBE13

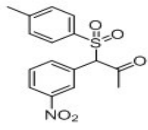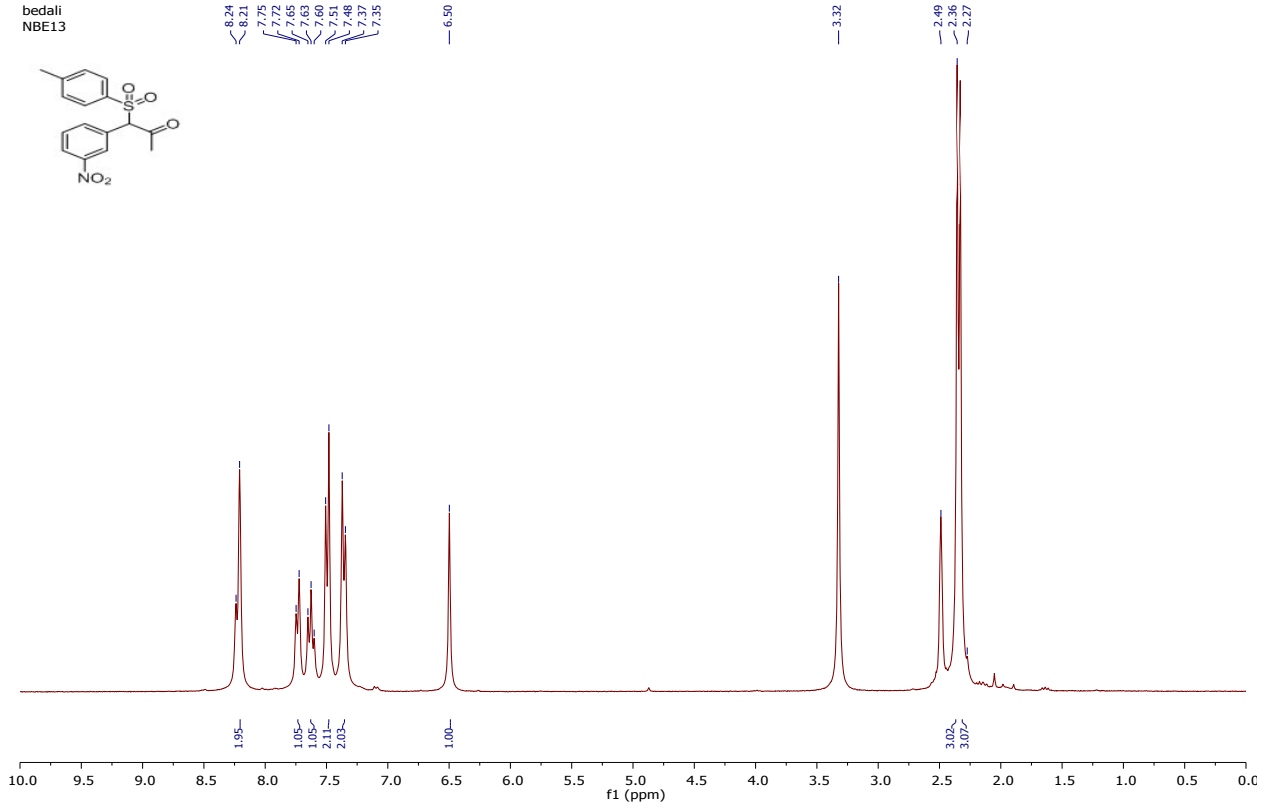

bedali  
NBE13

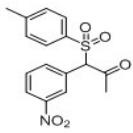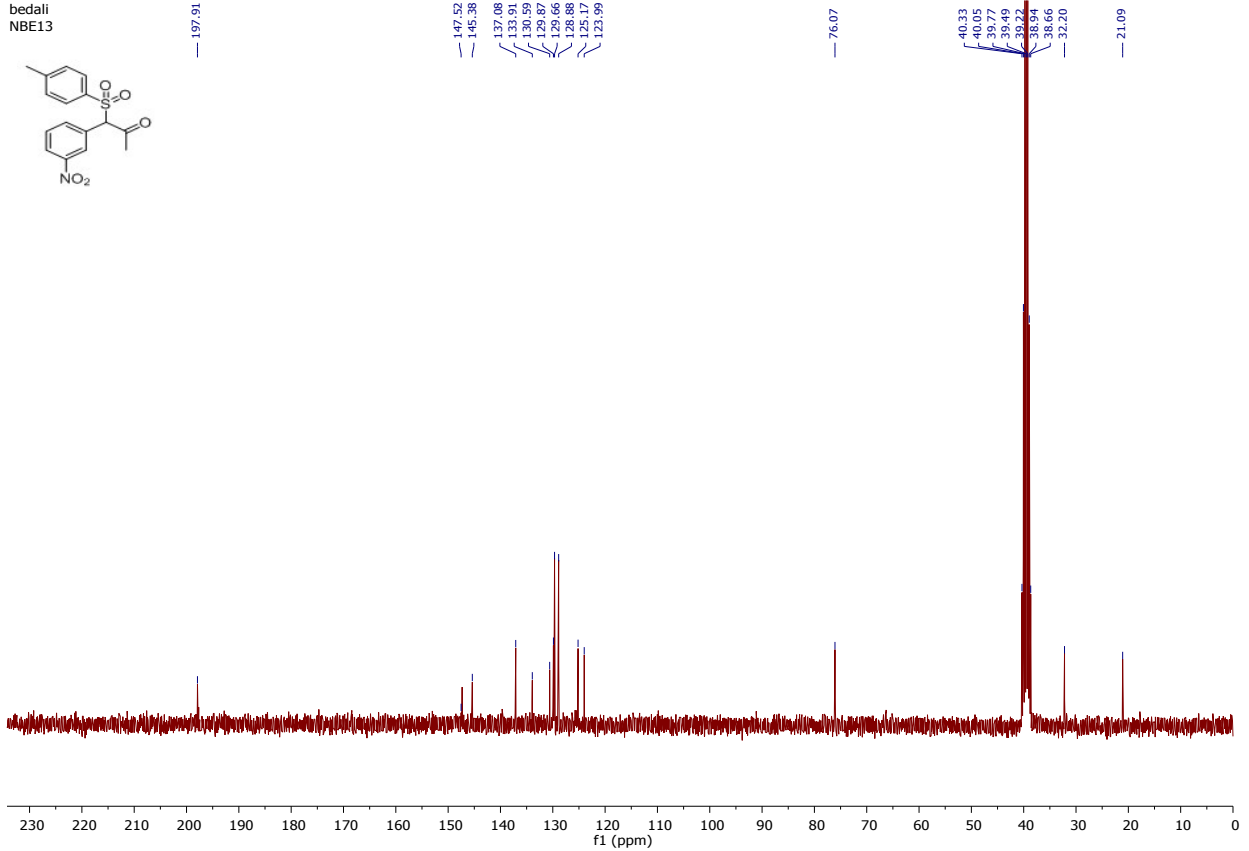

bedali  
NBE17

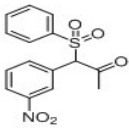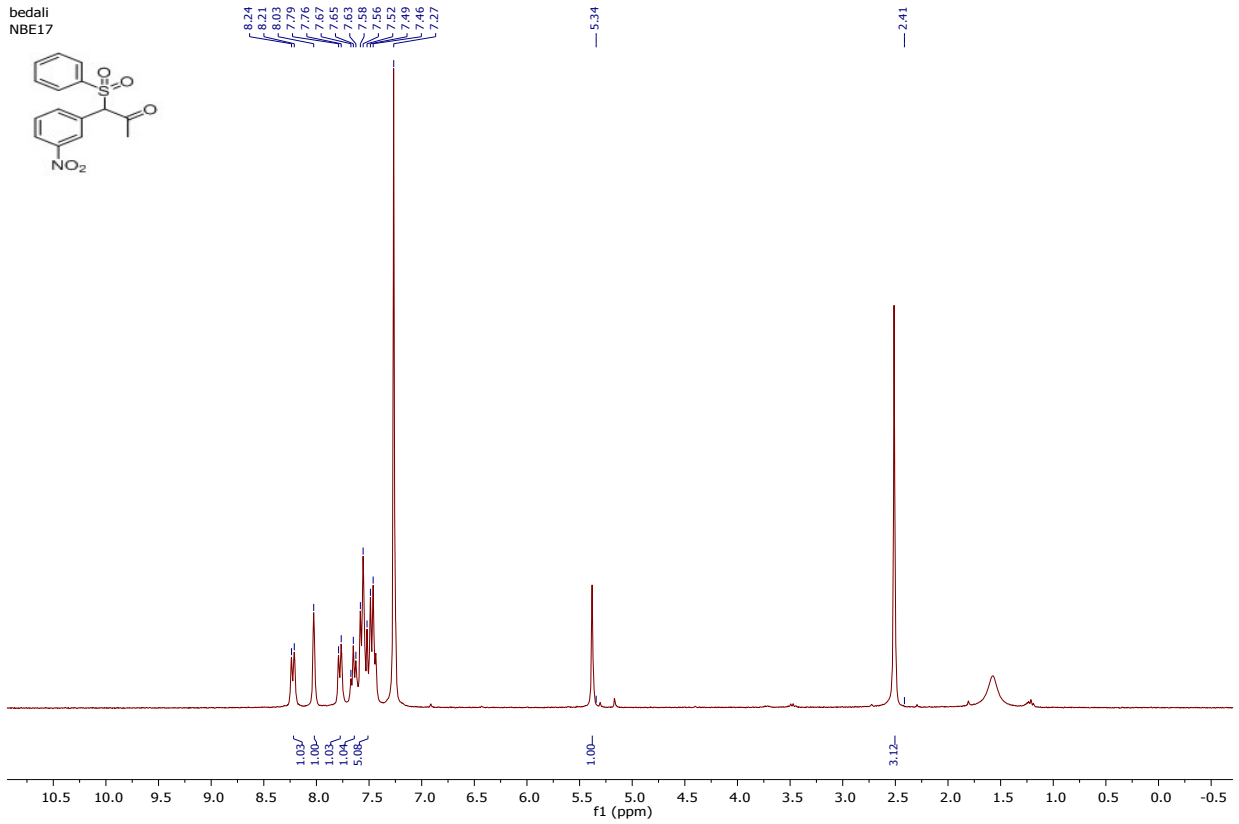

bedali  
NBE17

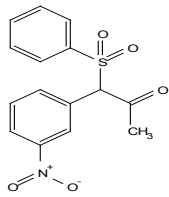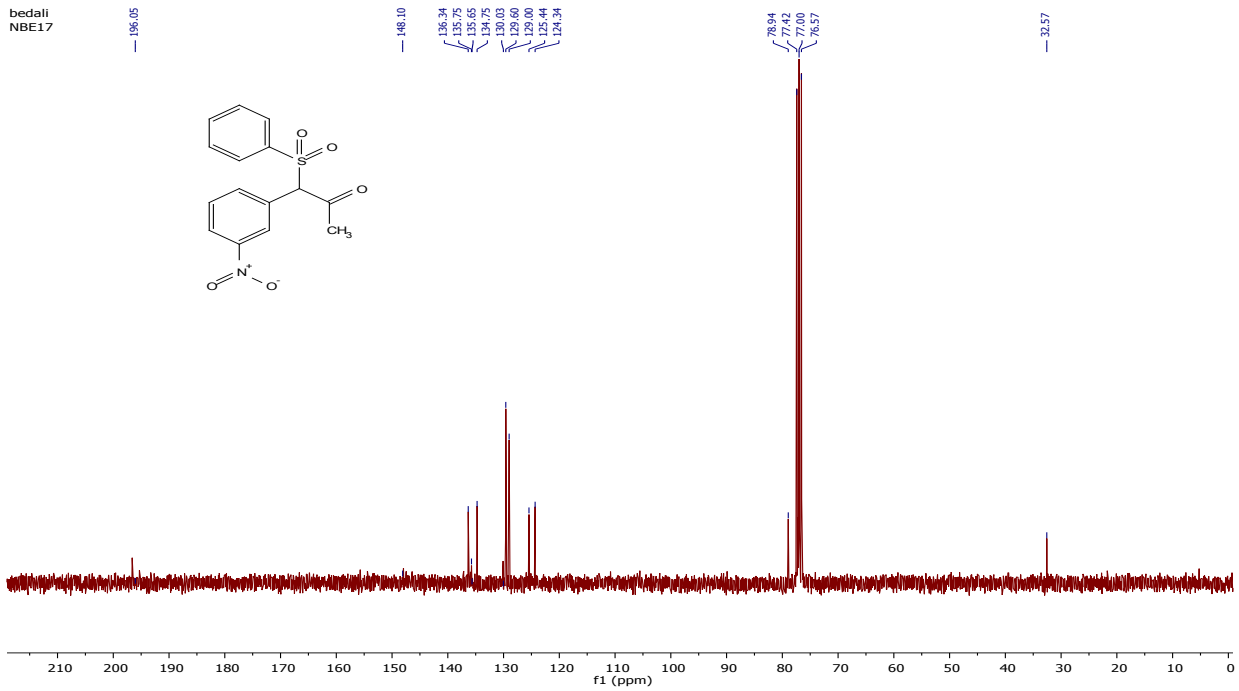

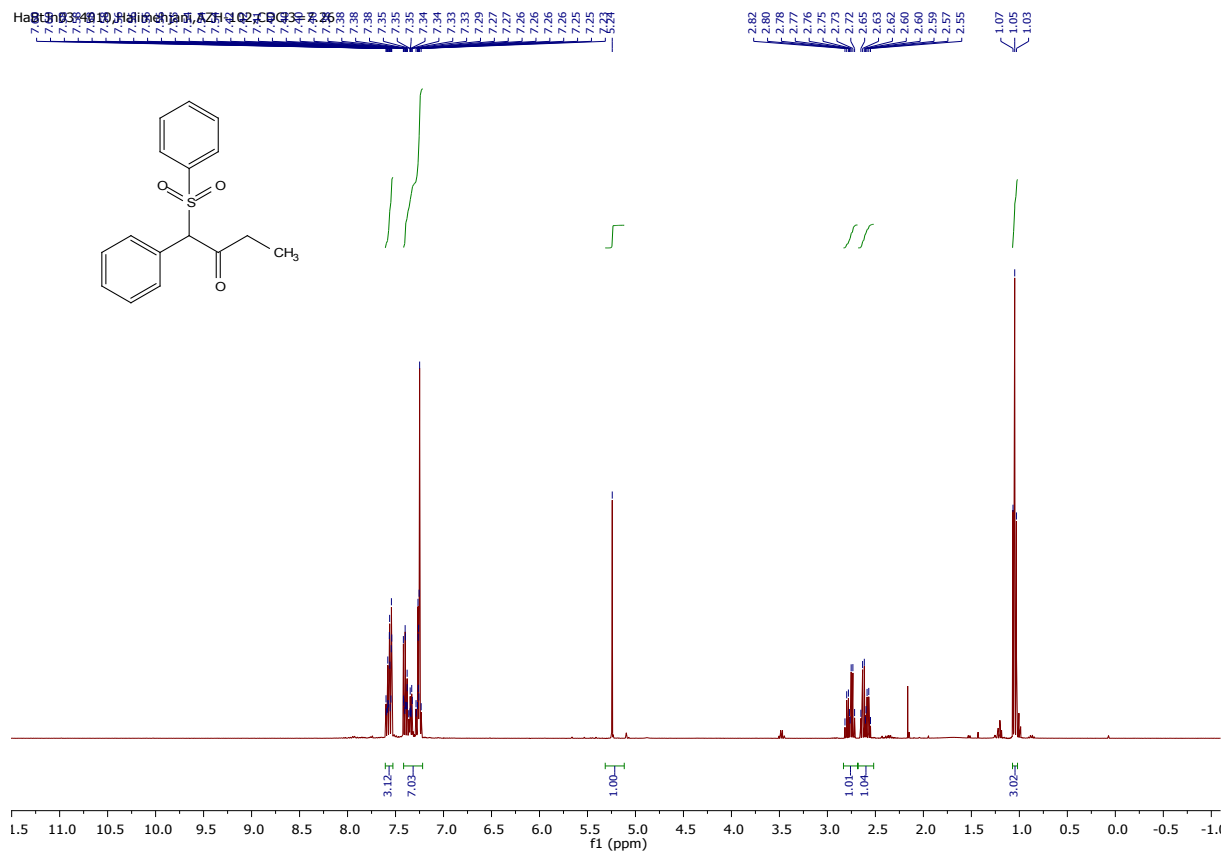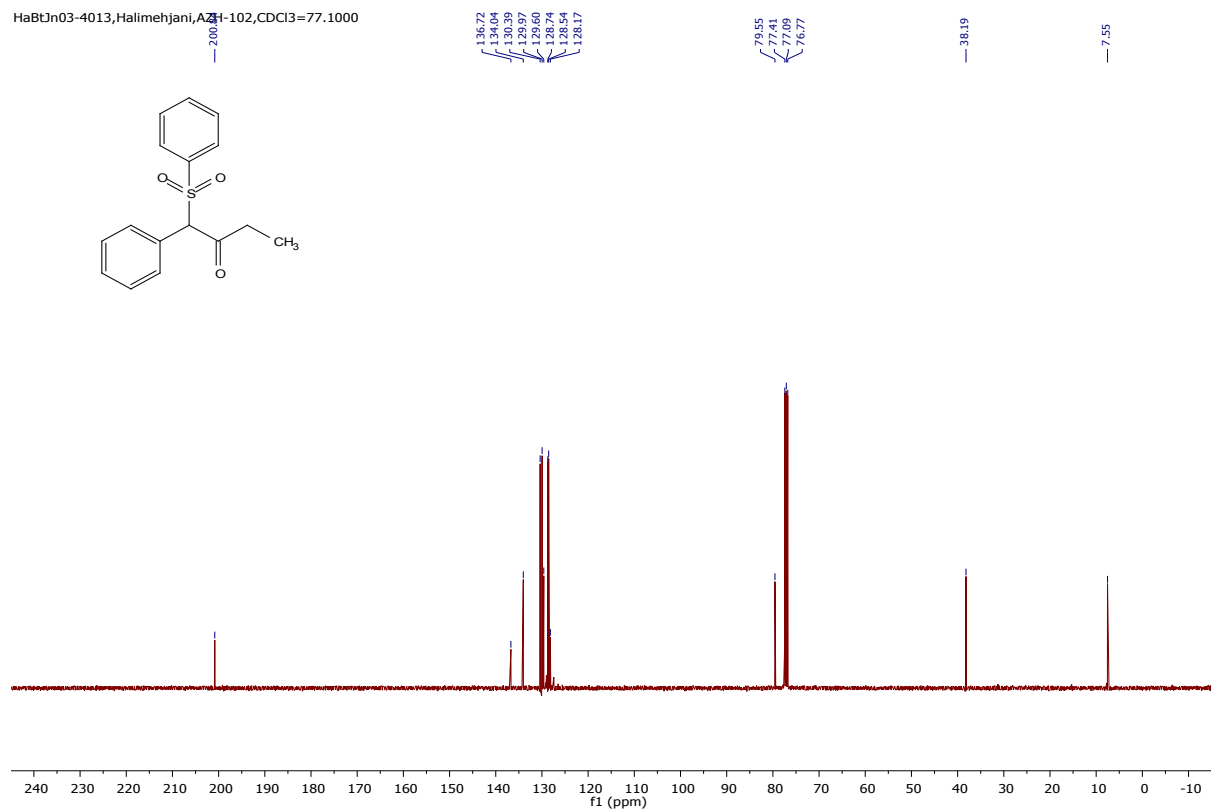



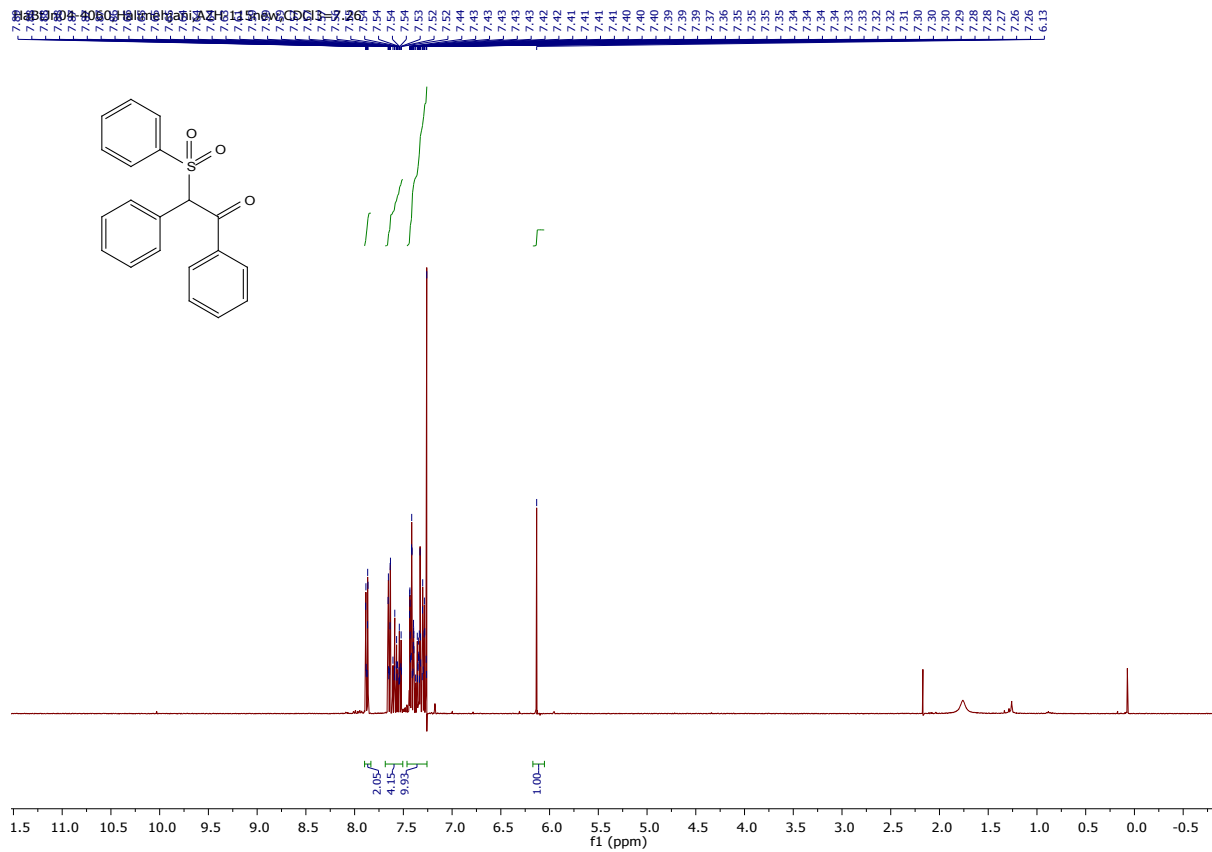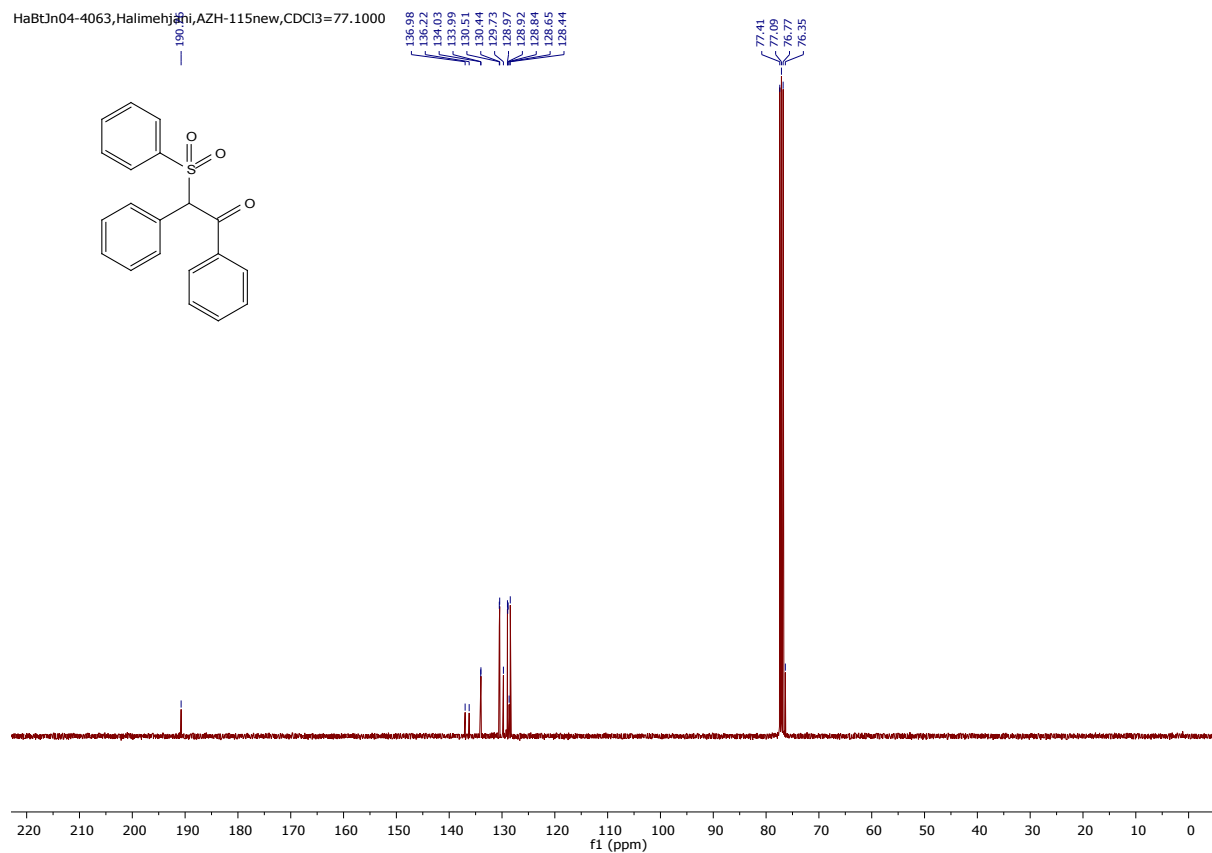

## References

1. Y. L. Nosood, A. Ziyaei Halimehjani, F. V. González, Regioselective Opening of Nitroepoxides with Unsymmetrical Diamines, *J. Org. Chem.* **2018**, *83*, 1252-1258
2. A. Groß, N. Schneiders, K. Daniel, T. Gottwald, J. Hartung, *Tetrahedron* **2008**, *64*, 10882-10889.
3. A. R. Katritzky, A. A. A. Abdel-Fattah, M. Wang, *J. Org. Chem.* **2003**, *68*, 1443-1446.
